# Supplementary material for: Mechanistic Phenotypes: An Aggregative Phenotyping Strategy to Identify Disease Mechanisms Using GWAS Data
Source: PLoS One. 2013 Dec 12;8(12):e81503. doi: 10.1371/journal.pone.0081503 (PMC3861317; doi:10.1371/journal.pone.0081503)
Supplement: File S1 — Table S1. Characteristics of the nsSNPs analyzed in the thrombosis study in AAs. Table S2. Characteristics of the nsSNPs analyzed in the cancer study in whites. Table S3. SNP selection and exclusion statistics. Table S4. Constituent phenotype ICD-9 grouping for the thrombosis mechanistic phenotype. Each row contains a diagnosis cluster and the ICD-9 codes mapped to that cluster. These groupings are similar to the Clinical Classification System for diagnosis codes, but some of the problem headings in the original classification system were subdivided into smaller groups of related ICD-9 codes. Table S5. ICD-9 and cancer mechanistic phenotype groupings. Each row contains a diagnosis cluster and the ICD-9 codes mapped to that cluster. These groupings are similar to the Clinical Classification System for diagnosis codes, but some of the problem headings in the original classification system were subdivided into smaller groups of related ICD-9 codes. Also shown are the mechanistic phenotypes (meta-groupings) that the diagnosis cluster was assigned to. Table S6. List of all functional ontologies associated with genes in the thrombosis data set. Table S7. List of all functional ontologies associated with genes in the cancer data set. Table S8. Type I error rates from simulations using the thrombosis data set. Type I error rates for the thrombosis phenotype are based on 1,000 randomizations of the 433 SNPs in the thrombosis data set. Type I error rates for the cancer data set are based on 500 randomizations of 833 SNPs in the cancer data set. For both reverse genetics models, the type 1 error represents the proportion of with p-values below the indicated threshold. Table S9. Association p-values between the thrombosis mechanistic phenotype and nsSNPs using a reverse genetics model (> = 2 affected subjects). Table S10. Association p-values between the thrombosis mechanistic phenotype and nsSNPs using a reverse genetics model (> = 2 affected subjects and Fisher p<0.1). Table [file pone.0081503.s006.xlsx]

## Sheet: Supplemental Table 1
SNP	chr	POS	Gene	MAF	A1	A2	a11	a12	a22
rs16823940	1	3548198	WRAP73	0.0939	T	C	12	287	1357
rs2275831	1	3745924	CEP104	0.08696	T	C	14	260	1382
rs10489962	1	15639581	FHAD1	0.09341	G	A	19	271	1364
rs16824215	1	17570691	PADI1	0.09813	A	G	14	297	1345
rs1748020	1	17668609	PADI4	0.09903	A	G	20	288	1348
rs12076815	1	18703328	IGSF21	0.09994	T	C	24	283	1349
rs2296225	1	21031042	KIF17	0.09634	C	T	15	270	1272
rs16828486	1	23763938	ASAP3	0.09789	G	T	11	302	1342
rs4393101	1	24416059	MYOM3	0.07207	T	C	11	203	1347
rs6659176	1	27239920	NR0B2	0.06798	G	C	10	205	1440
rs17360994	1	27278573	C1orf172	0.06711	C	T	11	200	1443
rs5939	1	28476520	PTAFR	0.07518	G	A	13	223	1420
rs3917974	1	36937701	CSF3R	0.09058	G	A	15	270	1371
rs3917973	1	36938269	CSF3R	0.09058	C	T	15	270	1371
rs1746842	1	39878815	MACF1	0.096	G	A	13	291	1347
rs6700677	1	43223489	LEPRE1	0.09994	T	C	16	280	1265
rs12094024	1	47280852	CYP4B1	0.08273	C	A	13	248	1395
rs17102592	1	47280927	CYP4B1	0.08273	G	T	13	248	1395
rs3087477	1	52861871	ORC1	0.08122	A	G	13	243	1400
rs17107831	1	53535499	PODN	0.07462	T	C	15	217	1423
rs7532933	1	64676452	UBE2U	0.09635	C	T	11	279	1272
rs17094779	1	74507423	LRRIQ3	0.09315	C	T	19	253	1290
rs1981071	1	79102726	IFI44L	0.06039	A	G	11	178	1467
rs11802902	1	100133290	PALMD	0.05982	A	C	11	176	1468
rs17121403	1	100335977	AGL	0.09934	G	A	11	307	1338
rs1175640	1	112999000	CTTNBP2NL	0.08099	A	G	13	227	1322
rs16833835	1	152059580	TCHHL1	0.09577	C	G	12	275	1274
rs423141	1	158669977	OR6K2	0.09347	C	G	18	256	1288
rs413029	1	158670426	OR6K2	0.09209	A	G	18	269	1369
rs16852767	1	163313568	NUF2	0.07459	C	A	13	220	1416
rs12060879	1	168665811	DPT	0.09539	A	G	13	272	1277
rs1028180	1	169345868	BLZF1	0.08726	C	T	11	267	1378
rs6031	1	169511903	F5	0.08424	T	C	12	255	1389
rs3917724	1	169581595	SELP	0.09698	T	C	12	297	1346
rs2072036	1	175105996	TNN	0.09923	T	C	16	278	1268
rs16855164	1	180010911	CEP350	0.09873	G	A	21	285	1350
rs2230157	1	183091058	LAMC1	0.09964	A	G	17	296	1343
rs3014626	1	204379617	PPP1R15B	0.09215	T	C	11	283	1361
rs16855539	1	205385412	LEMD1	0.07426	G	A	14	204	1344
rs17020956	1	207287481	C4BPA	0.09843	T	C	15	296	1345
rs3795523	1	214813941	CENPF	0.09541	G	C	14	288	1354
rs3795522	1	214814125	CENPF	0.09541	T	C	14	288	1354
rs3795519	1	214814733	CENPF	0.09511	C	A	14	287	1355
rs12067133	1	214814995	CENPF	0.09511	T	C	14	287	1355
rs3795517	1	214815916	CENPF	0.09511	G	A	14	287	1355
rs7533166	1	214819044	CENPF	0.09571	T	C	14	289	1353
rs5030752	1	220156704	EPRS	0.06306	C	T	10	177	1375
rs17163271	1	222753212	TAF1A	0.08575	C	A	14	256	1386
rs6689850	1	223567401	C1orf65	0.08099	C	T	13	227	1322
rs11802835	1	231320920	TRIM67	0.07639	T	C	23	207	1426
rs16832611	1	235594073	TBCE	0.07458	C	T	11	211	1340
rs16832619	1	235602193	TBCE	0.07426	G	A	10	212	1340
rs12359281	10	27353007	ANKRD26	0.08379	C	T	14	249	1390
rs12268559	10	32856746	CCDC7	0.08424	C	A	12	255	1389
rs17883898	10	44873213	CXCL12	0.08003	T	G	10	230	1322
rs2228065	10	45920506	ALOX5	0.08907	A	G	17	261	1378
rs12267385	10	46122199	ZFAND4	0.08333	A	G	15	246	1395
rs4253230	10	50667021	ERCC6	0.07266	A	G	10	207	1345
rs9073	10	52566611	A1CF	0.09964	T	C	10	310	1336
rs10509332	10	73051440	UNC5B	0.08097	A	G	14	240	1401
rs12256262	10	75037999	TTC18	0.0717	A	C	10	204	1348
rs11594934	10	76818077	DUPD1	0.08424	T	C	14	251	1391
rs7086200	10	85962824	CDHR1	0.09859	T	C	10	288	1264
rs12259382	10	96098493	NOC3L	0.09541	A	T	15	286	1355
rs2256871	10	96708974	CYP2C9	0.0795	C	T	11	241	1402
rs8187692	10	101595975	ABCC2	0.0855	T	G	12	259	1384
rs7073610	10	102006625	CWF19L1	0.08937	A	G	13	270	1373
rs12782963	10	102048208	PKD2L1	0.08686	T	G	13	261	1378
rs6584356	10	102050242	PKD2L1	0.08899	A	C	12	254	1296
rs7908490	10	112540884	RBM20	0.09635	A	C	21	259	1282
rs7920896	10	123846490	TACC2	0.09275	T	C	14	279	1362
rs3781408	10	126715692	CTBP2	0.08555	A	G	11	261	1382
rs28381319	10	127456150	MMP21	0.08092	T	C	10	248	1398
rs997983	10	129910475	MKI67	0.09843	C	A	11	304	1341
rs393044	11	5536537	UBQLNL	0.07074	A	C	10	201	1351
rs7924553	11	6646584	DCHS1	0.09667	T	C	20	262	1280
rs11041525	11	7694013	CYB5R2	0.0942	G	T	13	286	1357
rs1493953	11	12315891	MICALCL	0.08746	G	A	11	264	1360
rs7112749	11	17591922	OTOG	0.08092	T	C	10	248	1398
rs2445179	11	18195051	MRGPRX4	0.09849	A	G	11	304	1340
rs11820003	11	20948953	NELL1	0.08835	A	G	11	254	1297
rs1022586	11	32954344	QSER1	0.07609	C	T	12	228	1416
rs2297781	11	32955122	QSER1	0.07488	G	A	11	226	1419
rs7940077	11	32956244	QSER1	0.0765	A	G	11	217	1334
rs297118	11	55541098	OR5D13	0.08456	G	A	17	230	1314
rs297054	11	55563776	OR5D14	0.08514	T	G	17	248	1391
rs12291617	11	56086299	OR8K3	0.08611	A	G	16	237	1309
rs11228763	11	56511160	OR9G4	0.08364	G	A	12	253	1391
rs499037	11	59480952	OR10V1	0.09849	A	G	13	300	1342
rs77055528	11	62296535	AHNAK	0.09634	C	T	11	278	1268
rs624307	11	65144075	SLC25A45	0.08104	T	C	12	229	1320
rs7927388	11	65715005	TSGA10IP	0.0685	A	C	15	184	1363
rs11826683	11	66249898	DPP3	0.08333	A	G	11	254	1391
rs7926203	11	70821059	SHANK2	0.07426	A	G	10	212	1340
rs5743673	11	71712453	IL18BP	0.08931	A	G	14	251	1297
rs7938203	11	72040830	CLPB	0.06944	G	C	12	206	1438
rs2511241	11	72945341	P2RY2	0.08434	C	T	15	249	1390
rs12419308	11	73768553	C2CD3	0.09155	T	C	12	262	1288
rs12422149	11	74883577	SLCO2B1	0.08726	A	G	10	269	1377
rs17099969	11	102992107	DYNC2H1	0.08355	A	G	15	231	1316
rs7128270	11	112119652	C11orf34	0.0685	G	A	11	192	1359
rs2298813	11	121393684	SORL1	0.09849	A	G	14	298	1343
rs12792040	11	124624150	ESAM	0.07678	A	G	13	228	1413
rs7927108	11	134038949	NCAPD3	0.09758	T	G	12	299	1344
rs2230382	12	26639155	ITPR2	0.09379	A	G	18	257	1287
rs17118224	12	53097191	KRT77	0.09027	T	C	13	256	1293
rs2229774	12	53605545	RARG	0.08701	T	C	13	262	1380
rs17119344	12	57422934	MYO1A	0.0788	A	G	16	229	1411
rs2304821	12	70963619	PTPRB	0.09269	A	G	23	261	1372
rs10735309	12	78225374	NAV3	0.08611	A	G	10	249	1303
rs17855933	12	95660182	VEZT	0.07911	G	A	10	242	1404
rs17855934	12	95694111	VEZT	0.08031	G	T	10	246	1400
rs7135642	12	95926991	USP44	0.09328	C	T	18	272	1361
rs11838270	12	98927281	TMPO	0.07548	G	A	13	224	1419
rs12322444	12	99020476	IKBIP	0.08706	A	C	11	266	1377
rs7296162	12	100444984	UHRF1BP1L	0.06798	A	G	10	205	1440
rs60293430	12	109665242	ACACB	0.09686	A	G	19	264	1276
rs16942745	12	113758166	SLC24A6	0.08303	A	G	13	249	1394
rs9668527	12	118511726	VSIG10	0.09662	T	C	13	294	1349
rs11833399	12	122292685	HPD	0.07971	T	C	13	238	1405
rs11833801	12	131561394	GPR133	0.07729	A	G	12	232	1412
rs2282406	13	25743781	AMER2	0.09891	C	G	19	271	1272
rs4150313	13	103513951	ERCC5	0.07669	G	A	14	226	1416
rs1959630	14	20528359	OR4L1	0.08545	C	A	14	255	1387
rs10083536	14	20876189	TEP1	0.07613	A	G	10	232	1413
rs2067648	14	20979022	RNASE10	0.09315	A	G	21	249	1292
rs17103671	14	21811196	RPGRIP1	0.07911	G	A	12	238	1406
rs61744791	14	24586567	DCAF11	0.08136	A	G	13	228	1320
rs7151995	14	24901276	KHNYN	0.05616	G	T	11	164	1481
rs17104991	14	37149866	SLC25A21	0.0804	A	C	10	231	1320
rs13021	14	39650924	PNN	0.07746	G	A	12	218	1332
rs28507587	14	52493996	NID2	0.0701	T	C	10	199	1353
rs17094821	14	59113223	DACT1	0.08483	G	T	10	245	1307
rs17182762	14	74507320	CCDC176	0.08213	A	G	10	252	1394
rs6114	14	95056407	SERPINA5	0.08718	C	G	12	248	1300
rs2273801	14	100847437	WDR25	0.08665	C	T	12	263	1381
rs748358	14	105404593	AHNAK2	0.07458	A	G	10	213	1339
rs2066704	15	25953442	ATP10A	0.09873	A	G	20	287	1349
rs2066703	15	25962058	ATP10A	0.09758	T	C	19	285	1351
rs2307105	15	40265799	EIF2AK4	0.09827	A	G	13	281	1268
rs2444007	15	45047125	TRIM69	0.08978	A	G	13	271	1370
rs17588988	15	45047402	TRIM69	0.08816	G	A	13	266	1377
rs2279854	15	65863917	PTPLAD1	0.09843	C	A	16	294	1346
rs35571449	15	65917355	SLC24A1	0.09865	G	T	17	274	1270
rs2277552	15	69339787	NOX5	0.09825	T	C	23	279	1352
rs2929516	15	72338423	MYO9A	0.06306	A	G	10	177	1375
rs736118	15	74473739	STRA6	0.08278	T	C	13	248	1394
rs17598561	15	85198606	NMB	0.08671	T	C	14	259	1382
rs2242047	15	85478696	SLC28A1	0.08092	A	G	12	244	1400
rs16944971	15	91419098	FURIN	0.08912	T	C	11	273	1371
rs8050974	16	1618306	IFT140	0.08967	T	C	12	273	1371
rs7202010	16	4790599	C16orf71	0.07126	T	C	11	214	1431
rs16958654	16	11873158	ZC3H7A	0.09667	C	T	17	268	1277
rs373496	16	12060163	TNFRSF17	0.09692	T	C	12	297	1347
rs2228473	16	21974134	UQCRC2	0.08675	A	C	11	249	1302
rs9930821	16	26147454	HS3ST4	0.09699	T	G	15	273	1274
rs8057474	16	48138272	ABCC12	0.08182	A	T	11	249	1396
rs16957538	16	56533706	BBS2	0.07337	A	G	13	217	1426
rs34621310	16	66944180	CDH16	0.09859	T	C	13	282	1267
rs16957552	16	75269124	BCAR1	0.08736	C	T	12	247	1292
rs17736370	16	84256619	KCNG4	0.0997	T	C	18	294	1343
rs3751803	16	86565826	MTHFSD	0.0971	G	C	18	285	1350
rs17227354	16	89806477	FANCA	0.08387	T	C	13	236	1313
rs17225943	16	89869704	FANCA	0.06594	C	T	11	184	1367
rs17762735	17	3119611	OR1A1	0.08575	A	G	12	260	1384
rs3853648	17	5086956	ZNF594	0.09571	C	A	16	285	1355
rs9901675	17	7484812	CD68	0.06919	A	G	10	196	1355
rs17880282	17	7591997	WRAP53	0.08152	A	G	13	244	1399
rs11868946	17	7673605	DNAH2	0.08394	G	A	14	250	1392
rs3027238	17	8135061	CTC1	0.08333	A	G	12	252	1392
rs16945431	17	11795158	DNAH9	0.08696	A	G	11	266	1379
rs8072048	17	17896110	LRRC48	0.08792	A	G	13	265	1377
rs9909732	17	18181592	TOP3A	0.09813	T	C	19	287	1350
rs11870360	17	19835191	AKAP10	0.06643	A	G	10	200	1446
rs35452097	17	26883895	PIGS	0.08092	A	C	12	244	1400
rs34669811	17	26887128	PIGS	0.07729	T	C	10	236	1410
rs7216628	17	33772552	SLFN13	0.05858	T	C	14	155	1393
rs8072510	17	33772658	SLFN13	0.09305	T	G	16	276	1363
rs7210156	17	36997461	C17orf98	0.08937	A	G	14	251	1296
rs8071814	17	39577215	KRT37	0.05816	A	G	14	163	1465
rs9675246	17	39644900	KRT36	0.09184	T	C	12	280	1363
rs8069943	17	39645740	KRT36	0.09315	C	T	13	265	1284
rs8082683	17	39645761	KRT36	0.09315	A	G	13	265	1284
rs161628	17	41059631	G6PC	0.07337	T	C	10	223	1423
rs588703	17	41165493	IFI35	0.07855	T	C	10	240	1405
rs1135034	17	47783663	SLC35B1	0.09088	A	G	13	275	1368
rs2231510	17	48542690	CHAD	0.08462	A	G	13	238	1309
rs8178318	17	56324988	LPO	0.08877	T	C	20	254	1382
rs8068240	17	57288251	SMG8	0.09028	T	C	16	267	1373
rs6504191	17	62041068	SCN4A	0.08981	T	C	14	268	1366
rs9892705	17	72248482	TTYH2	0.08676	A	C	13	261	1380
rs8072406	17	80887123	TBCD	0.07795	T	G	10	238	1407
rs9676012	18	14837246	ANKRD30B	0.06731	T	C	10	190	1360
rs2917782	18	51855721	STARD6	0.09161	T	C	15	256	1290
rs1065205	18	61322995	SERPINB3	0.09469	G	A	53	204	1380
rs608433	18	74611127	ZNF236	0.05525	T	C	10	163	1483
rs16992131	19	3942110	NMRK2	0.07106	A	G	10	202	1350
rs2230635	19	4409511	CHAF1A	0.09347	G	A	14	264	1284
rs10417885	19	5924893	RANBP3	0.06582	A	G	10	198	1448
rs34488963	19	6430106	SLC25A41	0.08333	A	G	10	256	1390
rs12608960	19	6755155	SH2D3A	0.09722	C	T	20	282	1354
rs1035442	19	8961981	MUC16	0.09558	G	C	14	288	1351
rs7246969	19	9225940	OR7G1	0.0779	A	G	11	236	1409
rs7246980	19	9225973	OR7G1	0.08157	A	G	12	246	1397
rs7256787	19	15662199	CYP4F22	0.07441	C	A	13	206	1340
rs3212723	19	17954215	JAK3	0.08835	T	G	12	252	1298
rs8100724	19	29704010	UQCRFS1	0.06534	A	C	10	184	1367
rs7260392	19	33240734	TDRD12	0.09379	G	A	14	265	1283
rs34562867	19	36230767	IGFLR1	0.09539	G	A	13	272	1277
rs34494265	19	36350474	KIRREL2	0.06352	T	C	13	184	1456
rs11569681	19	48386992	SULT2A1	0.06598	G	C	10	186	1365
rs16981956	19	48789501	ZNF114	0.0914	C	T	12	278	1362
rs10406757	19	49965956	ALDH16A1	0.09539	A	G	14	270	1278
rs8104931	19	50954153	MYBPC2	0.09059	A	G	20	243	1299
rs16988799	19	51503285	KLK8	0.09789	T	C	17	290	1348
rs35849605	19	55606944	PPP1R12C	0.09964	A	G	20	290	1346
rs2240038	19	57955729	ZNF749	0.08937	A	G	16	264	1376
rs10413455	19	58131623	ZNF134	0.09964	A	G	21	288	1347
rs7577483	2	29274730	FAM179A	0.08001	T	G	15	235	1406
rs17031074	2	43801911	THADA	0.09873	A	G	14	299	1343
rs17031297	2	43927538	PLEKHH2	0.08243	A	C	14	245	1397
rs6756629	2	44065090	ABCG5	0.07669	A	G	16	222	1418
rs2302878	2	54135936	PSME4	0.09813	C	T	16	293	1347
rs11896293	2	73800058	ALMS1	0.0733	A	G	12	205	1345
rs13405869	2	74688884	MOGS	0.08092	A	G	13	242	1401
rs11126472	2	75720372	EVA1A	0.06522	T	C	10	196	1450
rs17025503	2	84932866	DNAH6	0.08001	A	G	12	241	1403
rs6742280	2	103136337	SLC9A4	0.06944	G	A	10	210	1436
rs10187689	2	106690368	C2orf40	0.07458	A	G	10	227	1419
rs6731822	2	113513825	CKAP2L	0.07458	T	C	14	219	1423
rs13409059	2	137872746	THSD7B	0.06914	A	G	10	209	1437
rs3815875	2	160710153	LY75	0.08726	G	T	14	261	1381
rs17544587	2	170502401	CCDC173	0.09315	A	G	10	271	1281
rs2737085	2	173352507	ITGA6	0.09118	T	G	14	274	1368
rs6758025	2	174074512	ZAK	0.09281	T	C	15	277	1362
rs10164753	2	179438866	TTN	0.08066	T	C	17	233	1405
rs922985	2	179615931	TTN	0.08808	C	G	10	255	1296
rs4894048	2	179638721	TTN	0.09058	T	C	15	270	1371
rs16867510	2	182780817	SSFA2	0.09603	T	C	14	272	1276
rs13419724	2	196545025	SLC39A10	0.07778	T	A	13	217	1332
rs3731895	2	220193917	RESP18	0.09091	T	C	14	256	1292
rs6742404	2	220250769	DNPEP	0.09603	C	T	13	274	1275
rs6736017	2	231973416	HTR2B	0.08515	C	T	11	244	1307
rs1529874	2	233349588	ECEL1	0.0942	C	T	17	278	1361
rs7565275	2	234229320	SAG	0.09873	G	A	20	287	1349
rs2286323	2	242036797	MTERFD2	0.08062	G	A	15	237	1404
rs6140807	20	947909	RSPO4	0.07266	T	C	10	207	1345
rs17717241	20	1224774	RAD21L1	0.09281	C	A	12	283	1359
rs6046740	20	20208971	C20orf26	0.08605	A	G	13	259	1384
rs11907355	20	31622711	BPIFB6	0.09432	A	C	14	284	1356
rs17122711	20	31680334	BPIFB4	0.08031	T	C	15	236	1405
rs6059139	20	31757078	BPIFA2	0.09783	A	G	18	288	1350
rs867186	20	33764554	PROCR	0.09366	G	A	14	282	1359
rs4988492	20	35882698	GHRH	0.07971	A	G	13	238	1405
rs16987188	20	36856616	KIAA1755	0.08701	A	G	14	260	1381
rs2233903	20	43851108	SEMG2	0.09245	T	C	18	270	1367
rs2233106	20	43922428	MATN4	0.09063	A	C	14	272	1369
rs7272702	20	55033782	CASS4	0.08726	T	G	17	255	1384
rs438363	20	62198348	HELZ2	0.09849	G	A	15	296	1344
rs8131735	21	31859574	KRTAP19-2	0.07069	A	C	12	210	1433
rs16989521	21	33949151	TCP10L	0.0781	T	C	12	220	1330
rs915877	21	45502844	TRAPPC10	0.07778	G	T	11	221	1330
rs9306099	21	45751814	C21orf2	0.08899	T	C	15	248	1299
rs16982020	22	17619076	CECR5	0.0788	G	C	12	222	1327
rs2073201	22	25294369	SGSM1	0.08483	A	G	10	245	1307
rs11549795	22	30221120	ASCC2	0.08943	A	G	15	266	1374
rs16989535	22	32229931	DEPDC5	0.07743	T	C	12	232	1409
rs16996616	22	36661891	APOL1	0.08387	A	G	13	236	1313
rs16998061	22	37692092	CYTH4	0.06763	G	A	10	204	1442
rs61737838	22	38084910	NOL12	0.08003	C	T	14	222	1326
rs17001213	22	39907975	SMCR7L	0.09358	T	C	17	275	1359
rs17002890	22	42607817	TCF20	0.0939	T	C	12	287	1357
rs9626829	22	46654035	PKDREJ	0.08899	T	C	13	252	1297
rs11553143	22	50754512	DENND6B	0.08451	T	C	11	242	1309
rs2269383	22	51012775	CPT1B	0.09601	A	G	16	286	1354
rs36042591	23	152226556	PNMA3	0.07304	A	G	10	133	869
rs1805373	3	9796508	OGG1	0.08905	A	G	12	254	1295
rs17016865	3	25640934	TOP2B	0.07186	C	T	10	218	1428
rs61095322	3	38168125	ACAA1	0.07714	C	A	17	207	1338
rs34043027	3	38347633	SLC22A14	0.06374	A	G	13	173	1375
rs2073714	3	38347851	SLC22A14	0.06341	G	A	14	182	1460
rs2234622	3	38417645	XYLB	0.09615	G	A	14	272	1274
rs7626962	3	38620907	SCN5A	0.08152	T	G	15	240	1401
rs13326552	3	44948480	TGM4	0.06555	A	G	10	184	1362
rs17286758	3	46586622	LRRC2	0.08067	C	T	13	226	1323
rs13321689	3	49149020	USP19	0.08273	C	T	10	254	1392
rs2230149	3	49845526	UBA7	0.08394	G	A	15	248	1393
rs1043261	3	53899276	IL17RB	0.0933	T	C	10	289	1357
rs11917716	3	108635060	GUCA1C	0.08635	A	G	11	264	1381
rs16845107	3	113127991	WDR52	0.09699	A	C	13	277	1272
rs12172926	3	123419288	MYLK	0.08243	T	C	13	247	1396
rs11543283	3	125786852	SLC41A3	0.06258	T	C	14	179	1461
rs10342	3	129155670	MBD4	0.07216	T	G	10	219	1427
rs1055153	3	149374873	WWTR1	0.06733	T	G	10	203	1443
rs16846673	3	151055645	P2RY12	0.09475	C	T	17	262	1283
rs4855271	3	164714532	SI	0.08792	C	T	10	271	1374
rs2068178	3	169485639	ACTRT3	0.08515	T	C	13	240	1309
rs2230570	3	184045410	EIF4G1	0.08611	C	T	11	247	1304
rs1003995	3	187089031	RTP4	0.08495	A	C	10	261	1383
rs6840615	4	15707250	BST1	0.09209	G	A	12	281	1363
rs16992035	4	36285777	DTHD1	0.08152	A	G	12	246	1398
rs3923647	4	38799539	TLR1	0.07492	T	A	10	228	1417
rs10014170	4	40104051	N4BP2	0.09827	G	A	13	281	1268
rs2348353	4	44652030	YIPF7	0.07009	T	C	13	206	1436
rs10003238	4	47548776	ATP10D	0.09987	G	A	25	262	1275
rs2227902	4	57797100	REST	0.09091	T	G	16	252	1294
rs7684722	4	79387464	FRAS1	0.0922	A	G	13	279	1362
rs17012064	4	87693992	PTPN13	0.05637	C	T	10	156	1395
rs2306369	4	123268859	KIAA1109	0.05223	G	A	10	153	1493
rs10027479	4	123664428	BBS12	0.07601	C	A	19	199	1341
rs17009684	4	126373653	FAT4	0.08605	G	A	10	265	1381
rs6855813	4	129792873	PHF17	0.08227	G	A	10	237	1315
rs2175563	4	141320021	CLGN	0.08514	T	C	14	254	1388
rs2567241	4	141323162	CLGN	0.08555	A	C	14	255	1385
rs61733152	4	143067053	INPP4B	0.09635	T	C	19	263	1280
rs7654410	4	144617316	FREM3	0.07941	T	C	13	237	1406
rs17023638	4	148575601	PRMT10	0.07186	C	T	13	212	1431
rs34432931	4	153690863	TIGD4	0.07362	T	C	10	210	1342
rs7666283	4	155250749	DCHS2	0.0733	T	C	14	201	1347
rs2170646	4	156618092	GUCY1A3	0.09955	A	G	20	271	1271
rs619128	4	159894250	C4orf45	0.07579	C	T	13	225	1418
rs12331663	4	164087753	NAF1	0.09752	A	G	14	295	1347
rs4690661	4	177073026	WDR17	0.07035	G	A	14	205	1437
rs6880875	5	1406375	SLC6A3	0.09028	T	C	10	279	1367
rs16875122	5	5242218	ADAMTS16	0.06612	T	G	10	199	1447
rs16879259	5	7866821	FASTKD3	0.07126	C	T	12	212	1432
rs41469	5	9629813	TAS2R1	0.07035	A	G	13	207	1436
rs9312870	5	14693030	FAM105B	0.07415	G	A	11	223	1418
rs10521016	5	34687817	RAI14	0.09251	C	T	16	257	1289
rs16870794	5	35037139	AGXT2	0.0733	G	C	12	205	1345
rs7702892	5	37115116	C5orf42	0.08099	T	C	11	231	1320
rs16903518	5	37158363	C5orf42	0.08099	A	G	11	231	1320
rs2230524	5	66478729	CD180	0.07554	G	A	11	214	1337
rs16870608	5	72868322	UTP15	0.08031	C	T	13	240	1403
rs2069683	5	75913784	F2RL2	0.08888	G	A	14	266	1374
rs2431352	5	75923294	IQGAP2	0.07458	T	G	12	223	1421
rs2266691	5	86703905	CCNH	0.08771	C	T	12	250	1300
rs17138681	5	115358137	AQPEP	0.09885	A	G	12	302	1335
rs2291628	5	127609633	FBN2	0.08273	A	G	11	252	1393
rs12109782	5	131007925	FNIP1	0.09891	A	C	16	277	1269
rs26008	5	131008194	FNIP1	0.08998	T	C	13	272	1371
rs11568525	5	131729935	SLC22A5	0.07277	T	C	11	219	1426
rs2472647	5	140710705	PCDHGA1	0.06914	C	T	15	199	1442
rs2233295	5	150429452	TNIP1	0.06884	T	C	10	208	1438
rs6874468	5	151055695	SPARC	0.08808	A	G	10	271	1371
rs10078686	5	179229039	MGAT4B	0.07341	C	A	10	223	1422
rs1802323	6	6654849	LY86	0.09475	G	A	14	268	1280
rs2076506	6	22570064	HDGFL1	0.0716	T	C	11	215	1429
rs1923185	6	24780892	GMNN	0.08643	C	A	15	240	1307
rs6933573	6	25820124	SLC17A1	0.0993	T	C	11	288	1262
rs16891646	6	26393058	BTN2A2	0.07437	T	C	13	220	1421
rs11970638	6	27834877	HIST1H1B	0.09269	C	T	11	285	1360
rs2232434	6	28358893	ZSCAN12	0.08122	G	A	15	239	1402
rs9295783	6	28963323	ZNF311	0.06733	A	G	11	201	1444
rs3129157	6	29141743	OR2J2	0.08877	A	G	11	272	1373
rs3888778	6	30529622	PRR3	0.08016	A	G	15	235	1403
rs28986467	6	30675605	MDC1	0.09209	C	A	13	279	1364
rs9267532	6	31639979	LY6G5B	0.09601	T	C	20	278	1358
rs28381349	6	31709045	MSH5	0.08036	T	C	10	246	1399
rs35196751	6	31760654	VARS	0.0788	A	G	17	227	1412
rs2227955	6	31778077	HSPA1L	0.08545	C	A	17	249	1390
rs3911893	6	31935567	SKIV2L	0.07911	T	C	10	242	1404
rs17207923	6	32036788	TNXB	0.0861	T	C	12	261	1382
rs3097675	6	33053640	HLA-DPB1	0.07655	C	T	15	209	1337
rs9296146	6	35289024	DEF6	0.09667	A	G	18	266	1278
rs1678674	6	38759379	DNAH8	0.09401	A	G	15	281	1358
rs34574340	6	43014079	CUL7	0.07106	T	C	11	200	1351
rs16896629	6	43638636	RSPH9	0.07639	A	G	11	231	1414
rs16885197	6	54173355	TINAG	0.09964	G	A	23	284	1349
rs9444039	6	83850049	DOPEY1	0.09275	T	A	13	281	1361
rs12530146	6	90408742	MDN1	0.09734	T	C	14	294	1346
rs4946977	6	109775366	MICAL1	0.09209	T	C	13	279	1364
rs6907580	6	117150008	GPRC6A	0.08877	A	G	16	262	1378
rs475076	6	125379112	RNF217	0.08131	A	G	10	234	1318
rs6934118	6	144185692	ZC2HC1B	0.0788	T	C	17	227	1412
rs3749930	6	155761246	NOX3	0.07674	T	G	12	230	1413
rs768994	6	159399348	RSPH3	0.07402	C	T	12	221	1422
rs16889320	6	159414899	RSPH3	0.08355	C	T	14	233	1315
rs1801474	6	162622197	PARK2	0.07367	A	G	11	222	1423
rs902393	6	168463624	FRMD1	0.06352	A	G	11	188	1454
rs3800544	6	170058374	WDR27	0.0933	T	C	16	277	1363
rs7804532	7	7571094	COL28A1	0.0933	G	C	17	275	1364
rs4986826	7	17379157	AHR	0.07143	A	G	11	201	1349
rs2069830	7	22767137	IL6	0.08424	T	C	12	255	1389
rs17147995	7	23299648	GPNMB	0.07971	T	C	11	242	1403
rs10272187	7	45216926	RAMP3	0.09667	A	G	21	260	1281
rs1109968	7	76891485	CCDC146	0.08635	G	A	15	256	1385
rs3211938	7	80300449	CD36	0.09813	G	T	18	289	1349
rs2041049	7	87537177	DBF4	0.08207	C	T	10	251	1390
rs17255978	7	87754915	ADAM22	0.09632	A	G	19	281	1356
rs17155937	7	108213532	DNAJB9	0.09668	A	G	20	280	1355
rs2974938	7	113518502	PPP1R3A	0.08967	T	A	17	263	1376
rs2974942	7	113519796	PPP1R3A	0.08726	G	A	17	255	1384
rs1029396	7	117024820	ASZ1	0.07277	G	T	10	221	1425
rs798911	7	120911462	CPED1	0.06522	C	A	10	196	1450
rs2285348	7	127224976	GCC1	0.05539	C	G	13	157	1482
rs2233578	7	127254551	PAX4	0.09704	T	C	14	293	1347
rs17151919	7	127894592	LEP	0.08907	A	G	13	269	1374
rs3112374	7	135418959	FAM180A	0.09449	T	C	14	267	1280
rs4252499	7	142609749	TRPV5	0.08847	A	G	12	269	1375
rs8176038	7	142640113	KEL	0.09632	C	T	15	289	1352
rs2072164	7	143657427	OR2F1	0.08424	T	C	15	233	1313
rs6975981	7	150730712	ABCB8	0.0858	A	G	19	246	1390
rs6464201	7	151800228	GALNT11	0.09155	T	C	17	252	1293
rs2072174	8	196274	ZNF596	0.08912	G	T	16	263	1376
rs505480	8	12878843	KIAA1456	0.08585	T	G	17	250	1387
rs17550360	8	16850601	FGF20	0.08187	A	G	13	245	1397
rs7007084	8	24251659	ADAMDEC1	0.09571	C	T	21	275	1360
rs4732748	8	27634064	ESCO2	0.09547	T	C	14	288	1353
rs323343	8	30702218	TEX15	0.07848	C	T	10	225	1326
rs16919579	8	80915322	MRPS28	0.08036	A	G	15	236	1404
rs7821248	8	86245776	CA1	0.09884	A	G	16	276	1266
rs2228063	8	86392989	CA2	0.08259	G	A	11	236	1315
rs10504829	8	87917340	CNBD1	0.08707	A	G	17	238	1307
rs3210518	8	92097062	OTUD6B	0.07488	A	G	10	228	1418
rs7833473	8	99101421	C8orf47	0.07944	A	G	13	222	1326
rs2272722	8	124031541	DERL1	0.07065	C	T	10	214	1432
rs11549789	8	144689289	PYCRL	0.08907	A	G	13	269	1374
rs7823979	8	145640235	SLC39A4	0.09763	T	C	15	275	1272
rs10974657	9	4622453	SPATA6L	0.0622	C	T	10	186	1460
rs10115703	9	14722616	CER1	0.09426	A	G	11	290	1354
rs3808794	9	17273754	CNTLN	0.08488	C	A	15	235	1311
rs16931549	9	34485237	DNAI1	0.07911	T	C	11	240	1405
rs11575594	9	34662048	CCL27	0.08847	C	T	12	269	1375
rs2237857	9	35076755	FANCG	0.08701	A	G	10	268	1377
rs12339582	9	35398900	UNC13B	0.09481	T	G	14	286	1356
rs2233560	9	35957831	OR2S2	0.07234	A	G	11	204	1347
rs16932912	9	36087876	RECK	0.0936	A	G	19	272	1365
rs12337034	9	37776283	TRMT10B	0.08213	C	T	11	250	1395
rs7039287	9	112898708	AKAP2	0.07795	A	G	14	230	1411
rs2274750	9	117803271	TNC	0.08364	A	G	10	257	1389
rs7854446	9	127230864	GPR144	0.09239	A	G	12	282	1362
rs10793873	9	134350647	PRRC2B	0.06658	T	C	10	188	1364

## Sheet: Supplemental Table 2
SNP	chr	POS	Gene	MAF	A1	A2	a11	a12	a22
rs35471880	1	881918	NOC2L	0.0673	T	C	22	361	2626
rs12137794	1	6628531	DNAJC11	0.0911	T	C	22	519	2549
rs15786	1	17185179	ATP13A2	0.06206	A	G	17	350	2727
rs41272737	1	17281235	CROCC	0.05616	A	G	14	310	2685
rs3750300	1	17458721	PADI3	0.0905	G	A	26	508	2560
rs2272629	1	17465903	PADI3	0.07577	A	G	18	420	2571
rs1748020	1	17541196	PADI4	0.05854	A	G	18	326	2748
rs35497285	1	17914122	ARHGEF10L	0.08561	A	G	28	459	2521
rs1043657	1	19507598	AKR7A2	0.09387	A	G	24	516	2464
rs10916668	1	20105673	OTUD3	0.06868	A	G	20	385	2689
rs2296225	1	20903629	KIF17	0.08231	C	T	21	453	2533
rs1076669	1	21446442	ECE1	0.08533	T	C	19	490	2585
rs2229489	1	22168845	HSPG2	0.06117	A	T	13	342	2653
rs2229475	1	22181895	HSPG2	0.06138	A	G	13	343	2650
rs2235541	1	23950038	TCEB3	0.09156	T	C	26	499	2484
rs2229579	1	24073749	CNR2	0.09874	T	C	28	538	2442
rs34449716	1	26162313	C1orf135	0.06049	C	A	12	340	2657
rs12138368	1	26392879	CATSPER4	0.0892	T	G	24	504	2566
rs6659176	1	27112507	NR0B2	0.07776	G	C	20	427	2556
rs17360994	1	27151160	C1orf172	0.0776	C	T	20	427	2562
rs12032332	1	32445519	IQCC	0.05383	A	G	12	309	2772
rs1416840	1	36661049	OSCP1	0.09671	G	A	30	522	2457
rs6670599	1	37958310	EPHA10	0.09098	T	C	32	483	2491
rs12405650	1	37961327	EPHA10	0.09156	T	C	32	487	2490
rs17511304	1	37961374	EPHA10	0.09206	G	A	32	490	2487
rs17363472	1	41819795	HIVEP3	0.05336	G	C	11	299	2698
rs11581921	1	42988517	LEPRE1	0.08112	T	C	25	452	2617
rs3219484	1	45572743	MUTYH	0.07692	A	G	17	442	2635
rs2229540	1	45804898	AKR1A1	0.05315	G	A	11	297	2693
rs1052607	1	46272113	MAST2	0.07579	G	A	26	417	2651
rs41292543	1	46774783	UQCRH	0.0978	G	A	33	522	2451
rs17107831	1	53308087	PODN	0.05739	T	C	15	315	2676
rs3762321	1	62026071	INADL	0.09634	T	C	31	533	2524
rs17490057	1	67109277	SGIP1	0.06366	C	G	18	347	2643
rs11209026	1	67478546	IL23R	0.06078	A	G	12	352	2729
rs2305549	1	74828007	C1orf173	0.08067	C	T	18	463	2612
rs3820093	1	78868114	IFI44L	0.07434	T	C	18	424	2652
rs17399721	1	85946531	ZNHIT6	0.08128	T	C	20	449	2539
rs17128866	1	86591141	COL24A1	0.08597	G	A	20	477	2510
rs3088371	1	93826178	DR1	0.09375	T	A	20	524	2464
rs1801466	1	94476467	ABCA4	0.06724	T	A	13	378	2613
rs2297595	1	97937679	DPYD	0.09308	C	T	22	532	2540
rs17553619	1	109063032	FNDC7	0.07212	G	A	15	404	2590
rs2271885	1	110723238	SLC16A4	0.05302	C	A	13	302	2778
rs15396	1	111692693	C1orf88	0.0784	C	A	19	447	2627
rs6537825	1	114749804	TRIM33	0.07034	A	G	20	395	2677
rs2275249	1	146759320	CHD1L	0.07906	G	C	22	431	2551
rs1044808	1	149871905	BOLA1	0.07841	C	G	22	426	2549
rs41271951	1	150737220	CTSS	0.08519	G	A	18	476	2511
rs3795393	1	151776514	S100A5	0.07434	C	T	12	436	2646
rs2231856	1	155362094	ETV3	0.0988	C	T	24	562	2501
rs1129923	1	158018690	DUSP23	0.09502	A	G	31	526	2537
rs1130183	1	158278136	KCNJ10	0.0624	T	C	15	356	2722
rs3796504	1	158847173	SLAMF1	0.09048	T	G	33	489	2545
rs6036	1	167782350	F5	0.07067	A	G	18	389	2600
rs6015	1	167786518	F5	0.07031	T	C	18	387	2603
rs6033	1	167788477	F5	0.07	G	A	19	395	2679
rs5356	1	167961542	SELE	0.09242	C	T	27	502	2479
rs5368	1	167963570	SELE	0.09421	T	C	29	525	2540
rs5363	1	167965413	SELE	0.09787	C	T	24	541	2444
rs5361	1	167967684	SELE	0.0978	C	A	25	555	2513
rs1800016	1	167968525	SELE	0.09723	G	A	24	535	2439
rs2272920	1	168066504	C1orf112	0.09295	A	C	20	535	2538
rs17563089	1	169194239	C1orf129	0.09242	G	A	34	493	2508
rs2020870	1	169421583	FMO2	0.06739	G	A	15	387	2692
rs2020863	1	169441155	FMO2	0.08953	G	A	28	498	2568
rs12143301	1	169823790	SCYL3	0.09292	G	C	20	519	2469
rs16844498	1	170697956	C1orf105	0.05687	G	A	16	309	2673
rs16863872	1	170934394	C1orf129	0.08583	C	T	23	469	2508
rs2239818	1	175375635	TNR	0.06979	T	C	21	378	2610
rs12118933	1	176833497	ASTN1	0.0884	C	G	19	494	2496
rs13306731	1	177587201	SOAT1	0.07136	G	A	11	418	2654
rs17369441	1	177727429	AXDND1	0.07107	T	C	14	399	2591
rs6704505	1	177866624	TDRD5	0.0967	G	A	25	548	2519
rs17279712	1	178144403	TOR1AIP1	0.05691	C	A	16	310	2679
rs16855164	1	178277534	CEP350	0.06138	G	A	13	343	2650
rs20559	1	181366183	LAMC1	0.07148	A	G	16	398	2594
rs11586699	1	181451313	LAMC2	0.08026	T	C	22	439	2548
rs12138336	1	197070521	ASPM	0.07295	G	C	14	411	2584
rs2820289	1	200043873	NAV1	0.07924	T	C	21	448	2623
rs3737875	1	201407294	MYBPH	0.09118	T	C	26	496	2483
rs2089891	1	202646075	PPP1R15B	0.09355	G	A	32	499	2478
rs3851294	1	203397036	DSTYK	0.09615	A	G	32	531	2531
rs2274702	1	203620115	LEMD1	0.08852	G	T	23	477	2454
rs35369693	1	204391258	AVPR1B	0.06715	C	G	19	366	2623
rs1134647	1	212558909	SMYD2	0.07321	G	A	18	417	2659
rs11547779	1	218397295	RAB3GAP2	0.09525	A	G	21	531	2456
rs708776	1	224990128	ITPKB	0.05985	C	A	17	336	2738
rs35155240	1	228550426	OBSCN	0.07611	T	C	17	421	2551
rs2274067	1	229443429	C1orf131	0.09634	C	G	25	529	2451
rs1766574	1	232596653	SIPA1L2	0.07478	C	T	19	412	2578
rs4149963	1	240102005	EXO1	0.08234	T	C	26	457	2608
rs3207775	10	1050218	GTPBP4	0.09638	A	G	21	554	2517
rs1044261	10	1055710	IDI2	0.07083	T	C	13	412	2667
rs9333269	10	15649698	ITGA8	0.07931	C	A	19	438	2544
rs691112	10	18242304	SLC39A12	0.08026	A	G	14	455	2540
rs2778979	10	20574339	PLXDC2	0.09272	T	C	26	521	2543
rs41277370	10	21134282	NEBL	0.08772	G	C	23	481	2500
rs4025981	10	21179395	NEBL	0.08801	C	T	23	481	2490
rs11013233	10	23335909	ARMC3	0.04221	C	T	11	232	2766
rs33947968	10	26434455	MYO3A	0.08943	A	C	29	480	2499
rs12268559	10	32896752	CCDC7	0.08519	C	A	27	473	2593
rs1208606	10	38281073	ZNF25	0.09583	C	A	22	549	2523
rs10508862	10	38345465	ZNF33A	0.09611	C	G	21	536	2450
rs8178990	10	50500177	CHAT	0.06286	T	C	14	361	2719
rs5030737	10	54201248	MBL2	0.07081	T	C	18	390	2600
rs11594934	10	76488083	DUPD1	0.07095	T	C	12	403	2594
rs6413520	10	81696261	SFTPD	0.07463	C	T	12	425	2571
rs3088308	10	81697868	SFTPD	0.07316	T	A	14	412	2581
rs11200933	10	85987085	LRIT1	0.06067	T	G	13	339	2656
rs11594445	10	95073029	MYOF	0.07046	T	C	14	396	2599
rs11592273	10	100179558	HPS1	0.07773	A	C	18	445	2631
rs7073610	10	101996615	CWF19L1	0.04977	A	G	12	284	2798
rs12782963	10	102038198	PKD2L1	0.04971	T	G	12	283	2793
rs6584356	10	102040232	PKD2L1	0.06019	A	C	19	333	2730
rs11598673	10	105167635	PDCD11	0.07307	T	G	20	412	2661
rs10883979	10	105947704	WDR96	0.04916	G	A	12	280	2800
rs12782946	10	115912482	C10orf118	0.08385	T	C	17	484	2588
rs363294	10	119033544	PDZD8	0.05868	T	C	11	341	2741
rs17153510	10	127431429	C10orf137	0.08043	A	G	18	448	2543
rs7918199	10	129795419	MKI67	0.09079	T	C	21	504	2482
rs4750685	10	129796354	MKI67	0.09134	A	G	22	521	2550
rs2853344	10	129797479	MKI67	0.09696	T	C	40	520	2534
rs997983	10	129800465	MKI67	0.09163	C	A	22	523	2549
rs3750587	10	134476283	C10orf92	0.0738	T	G	16	412	2580
rs12356978	10	134498269	C10orf92	0.07452	T	C	20	421	2652
rs35152544	10	135010568	KNDC1	0.06252	A	G	13	350	2644
rs10902268	11	1013987	MUC6	0.08777	A	G	27	473	2502
rs11245936	11	1074362	MUC2	0.09001	A	G	25	507	2562
rs41389046	11	1088835	MUC2	0.09654	T	C	27	527	2455
rs1541314	11	1220099	MUC5B	0.06854	A	G	18	388	2687
rs5744015	11	1255006	TOLLIP	0.04812	T	G	12	265	2726
rs3021155	11	1272709	MUC5B	0.06701	A	G	17	367	2608
rs3021156	11	1272754	MUC5B	0.06905	G	A	17	381	2607
rs17571	11	1739170	CTSD	0.0742	T	C	28	403	2662
rs12795289	11	4551121	C11orf40	0.06701	G	A	14	386	2689
rs17327254	11	4781925	OR52R1	0.09272	G	A	24	510	2475
rs10836954	11	4901805	OR51G1	0.05591	A	G	35	262	2672
rs2595453	11	6855071	OR10A4	0.06577	C	T	12	383	2699
rs11042836	11	10460312	AMPD3	0.09142	T	C	19	512	2477
rs1493953	11	12272467	MICALCL	0.07141	G	A	14	413	2661
rs17507577	11	15243059	INSC	0.07414	A	G	14	418	2576
rs8192690	11	17371146	ABCC8	0.05591	A	G	12	322	2760
rs1867877	11	18684024	IGSF22	0.04674	G	A	11	259	2736
rs1402954	11	33733910	FBXO3	0.09195	T	C	25	519	2550
rs35090414	11	45245778	PRDM11	0.09023	A	C	37	469	2503
rs35652107	11	46339011	CREB3L1	0.08225	T	C	23	449	2537
rs17596422	11	55437992	OR5W2	0.07356	G	A	14	416	2588
rs17596519	11	55438156	OR5W2	0.07314	G	A	14	412	2582
rs17511797	11	55438518	OR5W2	0.07439	T	G	14	432	2646
rs9666086	11	55460226	OR5I1	0.07434	G	A	14	432	2648
rs17597625	11	55460437	OR5I1	0.07436	C	T	14	432	2647
rs17600939	11	55555399	OR5AS1	0.07324	G	A	14	412	2578
rs17603011	11	55617729	OR8I2	0.07378	G	A	14	416	2579
rs7122514	11	55756864	OR5T2	0.07515	A	G	15	435	2644
rs17614327	11	55870340	OR8K1	0.07295	A	G	16	407	2586
rs1947924	11	55905025	OR8J3	0.0743	G	T	14	419	2575
rs7111634	11	55941923	OR5R1	0.07295	C	T	16	407	2586
rs7123108	11	55941977	OR5R1	0.07295	T	C	16	407	2586
rs1945237	11	55986645	OR5M9	0.0742	G	A	16	427	2650
rs7121880	11	55999737	OR5T2	0.0738	C	G	14	416	2578
rs17540861	11	56058474	OR8H1	0.07278	A	T	15	408	2586
rs11228763	11	56267736	OR9G4	0.09285	G	A	28	502	2475
rs17500380	11	58981341	OR4D6	0.04897	C	A	11	281	2802
rs17501584	11	59039437	OR4D9	0.05467	G	A	14	301	2694
rs499033	11	59237527	OR10V1	0.09006	A	G	39	464	2506
rs637186	11	60649182	CD5	0.09017	A	G	25	508	2561
rs1675126	11	61662950	INCENP	0.08117	A	G	14	460	2532
rs11549690	11	63748157	TRPT1	0.07965	T	C	16	447	2544
rs4672	11	63766455	FKBP2	0.08677	A	G	20	482	2506
rs10895991	11	64972286	CAPN1	0.08076	C	G	18	450	2541
rs11544832	11	65812261	YIF1A	0.04829	T	C	11	268	2724
rs1138272	11	67110155	GSTP1	0.0905	T	C	26	508	2560
rs36027301	11	67565844	TCIRG1	0.05899	T	C	14	327	2668
rs2277268	11	67930698	LRP5	0.06946	T	C	17	384	2608
rs17610395	11	68318904	CPT1A	0.07397	T	C	17	411	2580
rs2511241	11	72622989	P2RY2	0.07212	C	T	14	406	2589
rs7115499	11	74383250	NEU3	0.08131	A	G	20	463	2610
rs12422149	11	74561225	SLCO2B1	0.08985	A	G	20	516	2558
rs3741005	11	85801204	CCDC81	0.0968	C	T	28	543	2523
rs3740868	11	93753114	GPR83	0.09387	T	G	26	524	2518
rs3740862	11	94501936	ENDOD1	0.07277	T	C	11	428	2653
rs7123133	11	95352545	MAML2	0.09771	T	G	29	530	2450
rs17647207	11	100325873	ARHGAP42	0.09546	A	G	17	555	2513
rs10488698	11	116139157	BUD13	0.05627	T	C	12	324	2756
rs3135506	11	116662407	APOA5	0.05868	C	G	15	323	2670
rs1804690	11	118427410	HYOU1	0.09076	T	C	21	504	2483
rs2305013	11	119845270	ARHGEF12	0.05585	T	A	16	304	2688
rs12792040	11	124129360	ESAM	0.09051	A	G	26	507	2555
rs2277032	11	129306334	PRDM10	0.06898	G	A	17	381	2610
rs17667603	11	130066261	ST14	0.08025	A	C	21	440	2542
rs2286007	12	841552	WNK1	0.07304	T	C	18	416	2660
rs7962217	12	5931820	VWF	0.06021	T	C	15	332	2659
rs216321	12	6014245	VWF	0.08988	T	C	22	510	2550
rs5442	12	6825125	GNB3	0.07411	A	G	19	420	2651
rs34796296	12	7252506	C1RL	0.07527	T	C	19	415	2575
rs2273987	12	10042228	CLEC1B	0.07894	T	C	19	450	2622
rs16910526	12	10162354	CLEC7A	0.07646	C	A	19	422	2567
rs17375215	12	12375031	MANSC1	0.08907	T	C	24	488	2497
rs3751262	12	12509957	LOH12CR1	0.09505	A	G	26	536	2531
rs3741822	12	12994533	GPRC5D	0.07369	A	C	14	428	2652
rs34412222	12	13366504	EMP1	0.06564	A	G	15	365	2629
rs7133666	12	18335076	PIK3C2G	0.08455	A	C	19	485	2589
rs1546308	12	21176135	SLCO1B7	0.05965	A	G	17	325	2667
rs11568563	12	21348701	SLCO1A2	0.06614	C	A	21	367	2704
rs17688567	12	30797625	CAPRIN2	0.07081	A	G	20	386	2602
rs3759295	12	31836252	H3F3C	0.06222	G	T	13	359	2722
rs3207618	12	32026193	C12orf35	0.09522	A	G	25	539	2529
rs3759301	12	32135441	C12orf35	0.05484	A	G	12	306	2691
rs10878307	12	38958256	LRRK2	0.06981	G	A	14	404	2676
rs17128233	12	39138802	MUC19	0.07592	G	A	15	426	2562
rs17574839	12	43394747	NELL2	0.07014	C	T	13	408	2673
rs17224674	12	46882846	OR10AD1	0.08633	T	C	20	479	2507
rs3730064	12	47462849	ADCY6	0.08568	T	C	19	492	2582
rs34392760	12	48391657	COL2A1	0.05689	A	T	11	320	2675
rs11170164	12	51199935	KRT5	0.07401	A	G	18	422	2654
rs11170177	12	51252695	KRT74	0.05583	C	G	11	314	2684
rs9658625	12	51783669	SOAT2	0.06958	G	A	17	396	2677
rs2229774	12	51891812	RARG	0.06496	T	C	12	378	2704
rs997173	12	53641300	KIAA0748	0.06432	T	C	13	372	2709
rs12427129	12	54367690	HOXC11	0.08803	T	C	26	476	2497
rs17119344	12	55709201	MYO1A	0.07812	A	G	21	428	2559
rs3763979	12	58459673	SLC16A7	0.07824	A	G	24	436	2633
rs1800973	12	68030281	LYZ	0.06961	A	C	13	401	2653
rs1025016	12	68377719	BEST3	0.08129	G	A	19	465	2610
rs2304821	12	69249886	PTPRB	0.08956	A	G	22	510	2561
rs7298147	12	69302607	PTPRB	0.07245	T	C	19	398	2592
rs11541286	12	70294688	ZFC3H1	0.07258	G	A	17	415	2661
rs3741688	12	70450662	RAB21	0.09648	A	G	25	547	2522
rs33996476	12	77235768	ZDHHC17	0.09904	G	A	32	532	2445
rs10862089	12	79223606	OTOGL	0.07646	T	G	19	435	2639
rs2034528	12	79276791	OTOGL	0.07907	T	C	21	446	2619
rs7397266	12	84723066	RASSF9	0.08048	T	C	21	456	2617
rs7312075	12	85432040	LRRIQ1	0.09029	A	T	24	495	2488
rs11104703	12	86903919	C12orf50	0.07515	T	C	18	429	2647
rs17855933	12	94184313	VEZT	0.0999	G	A	26	549	2433
rs17855934	12	94218242	VEZT	0.0997	G	T	25	548	2426
rs2271979	12	94772742	CCDC41	0.06371	T	C	11	361	2634
rs2305293	12	95879734	METAP2	0.06777	A	G	13	381	2609
rs7296162	12	98969115	UHRF1BP1L	0.08034	A	G	18	461	2614
rs1609860	12	102572584	STAB2	0.08759	A	C	29	484	2581
rs2292688	12	102660446	STAB2	0.09538	A	G	23	528	2458
rs1663564	12	104070302	KIAA1033	0.09522	C	T	19	551	2523
rs16939904	12	108005152	USP30	0.08646	G	A	21	493	2580
rs2301610	12	109837939	MYL2	0.08857	C	T	19	495	2495
rs34725387	12	109872909	MYO1H	0.06834	T	C	14	383	2610
rs34831139	12	112113854	C12orf52	0.06913	A	C	11	394	2604
rs11564	12	113600940	DDX54	0.06863	T	C	11	391	2607
rs16950706	12	119938531	C12orf43	0.05722	A	G	16	312	2678
rs17525809	12	120077072	P2RX7	0.07565	C	T	25	418	2650
rs2272132	12	120953070	BCL7A	0.05402	A	G	13	299	2696
rs11837038	12	121668874	KNTC1	0.09244	G	T	29	514	2551
rs1106042	12	129407591	PIWIL1	0.05254	A	G	15	295	2783
rs2291256	12	131903396	GOLGA3	0.08533	A	G	29	470	2595
rs7330736	13	23721894	SPATA13	0.04739	T	C	11	263	2733
rs17773251	13	37678884	CSNK1A1L	0.08245	G	C	23	449	2530
rs35719359	13	100962156	PCCA	0.062	G	A	14	345	2649
rs2281723	13	112787227	MCF2L	0.07468	G	A	16	417	2573
rs17277025	14	19571884	OR4K13	0.0868	T	G	23	476	2508
rs17308108	14	20482919	OR4K14	0.08727	C	A	19	487	2502
rs1958396	14	20620909	ARHGEF40	0.09486	T	C	21	545	2528
rs3829409	14	22537504	C14orf93	0.09843	A	G	33	524	2440
rs11543947	14	22573861	PSMB5	0.07501	T	C	14	436	2643
rs34015250	14	23096333	THTPA	0.0899	G	A	22	497	2490
rs2273912	14	24649669	IPO4	0.09567	A	G	35	505	2465
rs12896790	14	37343673	TTC6	0.09263	G	T	30	513	2550
rs2180792	14	38719985	PNN	0.06786	A	T	14	380	2612
rs3825549	14	38786559	MIA2	0.07725	G	A	13	452	2629
rs34101857	14	45696037	MIS18BP1	0.08857	C	A	23	487	2499
rs9323183	14	50796881	CDKL1	0.06406	C	G	11	363	2631
rs2295847	14	51202311	NIN	0.09791	C	G	28	533	2447
rs45612333	14	55903716	TBPL2	0.09305	A	C	30	500	2479
rs2230098	14	57900731	ARID4A	0.06482	G	A	12	377	2704
rs17751301	14	63539581	SYNE2	0.07549	T	C	19	416	2572
rs17180350	14	64318819	SPTB	0.09588	T	C	22	533	2454
rs17245552	14	65249052	SPTB	0.0555	G	C	11	312	2686
rs2274440	14	68869559	GALNTL1	0.06248	A	G	16	344	2649
rs17782052	14	73156168	ACOT6	0.08956	A	G	26	487	2496
rs7972	14	76862990	GSTZ1	0.09408	A	G	26	530	2537
rs3742732	14	77012069	ISM2	0.08757	T	C	23	481	2505
rs1991517	14	81610583	TSHR	0.08059	G	C	18	449	2542
rs34302825	14	90712148	C14orf159	0.05982	A	G	14	332	2663
rs2295394	14	92482496	ITPK1	0.07032	T	C	13	409	2671
rs4905204	14	94005860	SERPINA9	0.06888	A	G	68	273	2628
rs17097718	14	98252288	C14orf177	0.06169	T	C	30	310	2659
rs3784246	15	22472742	C15orf2	0.06626	G	A	17	376	2701
rs2066704	15	23504535	ATP10A	0.0897	A	G	31	492	2565
rs2066703	15	23513151	ATP10A	0.08447	T	C	27	467	2590
rs1800407	15	25903913	OCA2	0.06962	A	G	17	385	2607
rs17227996	15	29082443	TRPM1	0.07406	G	T	17	424	2651
rs2279685	15	32436923	C15orf55	0.07951	A	G	15	462	2617
rs11853050	15	37331804	C15orf54	0.09342	T	C	26	524	2533
rs16970911	15	38704093	CASC5	0.0846	G	A	17	489	2585
rs17719808	15	41043483	UBR1	0.08073	C	T	19	447	2538
rs3742970	15	41409557	LCMT2	0.09505	A	C	21	546	2526
rs17588988	15	42834694	TRIM69	0.06933	G	A	16	397	2681
rs17740607	15	48342836	HDC	0.09605	A	G	29	520	2460
rs17819126	15	53577202	DYX1C1	0.06948	T	C	11	396	2601
rs11858624	15	53625877	PYGO1	0.06337	T	G	15	362	2716
rs1912403	15	53996225	NEDD4	0.09777	C	T	37	531	2526
rs12907567	15	60001899	VPS13C	0.0767	T	C	18	438	2634
rs11629598	15	60030489	VPS13C	0.07735	C	T	18	442	2630
rs2303405	15	60041083	VPS13C	0.0767	C	T	19	436	2635
rs35755513	15	62435239	CSNK1G1	0.07561	T	C	16	423	2570
rs17258507	15	64408400	DIS3L	0.08411	G	A	18	470	2520
rs2306022	15	66415217	ITGA11	0.0905	A	G	17	526	2551
rs736118	15	72260792	STRA6	0.08979	T	C	29	482	2496
rs2277603	15	72409586	CCDC33	0.08474	G	A	23	466	2532
rs1799814	15	72800040	CYP1A1	0.04028	A	C	12	218	2774
rs1801591	15	74365817	ETFA	0.08571	T	C	28	474	2590
rs3885951	15	76612972	AGPHD1	0.09522	C	T	31	527	2535
rs894780	15	77085578	RASGRF1	0.1032	T	C	34	570	2488
rs8923	15	77924615	MTHFS	0.09926	G	A	28	558	2507
rs1989	15	81572635	TM6SF1	0.08888	T	C	23	504	2567
rs17598561	15	82999610	NMB	0.06069	T	C	12	341	2654
rs3087374	15	87660998	FANCI	0.07258	T	G	24	401	2668
rs894157	15	87969112	C15orf42	0.0881	C	T	20	505	2568
rs11852361	15	89127103	BLM	0.07278	T	C	19	400	2590
rs11073922	15	90814664	NGRN	0.09218	T	C	18	518	2469
rs7167216	15	91354521	BLM	0.07314	A	G	18	404	2586
rs2005180	15	99536223	CHSY1	0.09355	T	C	25	513	2471
rs5030691	15	99666979	SYNM	0.07613	A	G	18	422	2568
rs17605	16	2026891	TBL3	0.08822	C	T	23	484	2497
rs34012042	16	2114407	TSC2	0.06962	A	G	15	389	2605
rs2270493	16	3490879	ZNF597	0.06179	A	T	12	346	2636
rs3810813	16	3579828	SLX4	0.05421	A	G	13	300	2694
rs3827530	16	3639977	SLX4	0.06879	A	G	16	382	2611
rs11557236	16	4459440	NMRAL1	0.08292	T	C	27	445	2537
rs35340520	16	4945687	PPL	0.06948	A	C	11	396	2601
rs1800067	16	13936534	ERCC4	0.08242	A	G	24	461	2603
rs11545395	16	15961351	FOPNL	0.05471	G	A	11	307	2689
rs226891	16	19455248	CCP110	0.09524	C	G	27	518	2458
rs5716	16	20796387	ACSM3	0.08663	C	G	19	483	2505
rs12924551	16	20873774	DNAH3	0.07646	A	G	18	424	2566
rs11554798	16	21884263	UQCRC2	0.05818	A	G	14	322	2672
rs2347	16	22227018	POLR3E	0.05536	C	A	12	315	2735
rs17841292	16	22237273	EEF2K	0.06996	G	C	13	395	2601
rs11644502	16	27688810	KIAA0556	0.06371	A	G	15	364	2713
rs5743291	16	49314777	NOD2	0.09214	A	G	28	514	2551
rs4359426	16	55950234	CCL22	0.05136	A	C	11	287	2710
rs16959641	16	56611600	C16orf57	0.08072	G	C	21	442	2535
rs17323082	16	57474687	CIAPIN1	0.05735	C	G	11	323	2674
rs237831	16	66614597	DDX28	0.09228	A	G	30	495	2482
rs11548855	16	66895449	SLC7A6OS	0.06846	G	A	15	382	2612
rs217180	16	70742130	PMFBP1	0.08791	A	G	24	496	2574
rs3764340	16	78466437	WWOX	0.04998	G	C	12	276	2713
rs2278022	16	79634322	ATMIN	0.07565	C	T	18	432	2643
rs10459872	16	79652452	C16orf46	0.07986	G	A	22	450	2621
rs8177876	16	81124275	GCSH	0.06996	T	C	14	393	2602
rs45443101	16	81922781	PLCG2	0.04441	T	A	11	245	2750
rs4782905	16	82813923	KCNG4	0.06984	T	C	17	398	2678
rs2303853	16	83031985	ATP2C2	0.06822	T	C	14	394	2685
rs17233497	16	88342653	FANCA	0.09006	T	C	26	490	2493
rs17232910	16	88367267	FANCA	0.09012	G	C	25	492	2490
rs11646374	16	88385436	FANCA	0.0894	A	G	25	503	2565
rs2228479	16	88513441	MC1R	0.09987	A	G	36	529	2444
rs1805008	16	88513645	MC1R	0.08059	T	C	31	423	2555
rs17178299	16	88631160	GAS8	0.07112	A	G	17	394	2598
rs7206111	16	88652372	PRDM7	0.06962	T	G	15	388	2599
rs8081370	17	1373612	MYO1C	0.09321	C	T	23	509	2445
rs17762735	17	3066361	OR1A1	0.07784	A	G	26	416	2564
rs2302319	17	4738081	MINK1	0.07164	T	C	15	413	2664
rs11653658	17	5354204	DHX33	0.07452	C	G	16	416	2574
rs2137722	17	5359523	NLRP1	0.04913	T	C	11	282	2801
rs11653832	17	5424906	NLRP1	0.04885	G	C	11	271	2717
rs34733791	17	5437285	NLRP1	0.04819	A	G	11	268	2730
rs11651595	17	5463279	NLRP1	0.04775	C	G	11	262	2701
rs28493751	17	6441376	PITPNM3	0.0986	A	G	25	543	2439
rs1509123	17	6624602	FBXO39	0.062	A	G	11	351	2646
rs2271233	17	6644845	TEKT1	0.08969	T	C	37	481	2576
rs35985803	17	7195039	ACAP1	0.08391	T	C	16	473	2520
rs33989543	17	7324788	SPEM1	0.07314	A	G	12	416	2580
rs35783712	17	10223793	MYH13	0.05834	A	G	11	329	2668
rs3213687	17	12802895	ARHGAP44	0.09106	A	G	28	492	2489
rs34342426	17	13980058	COX10	0.07012	A	T	12	398	2599
rs11544945	17	25529300	NSRP1	0.05918	C	A	14	328	2666
rs8072510	17	30796771	SLFN13	0.09676	T	G	31	536	2523
rs29019	17	31260255	TMEM98	0.09854	A	G	30	533	2446
rs3744355	17	33289046	ZNF830	0.09336	C	G	27	506	2466
rs11654824	17	33513337	UNC45B	0.07671	A	T	22	417	2566
rs9906595	17	34354906	FBXO47	0.08095	T	C	23	440	2539
rs2941515	17	35066864	STARD3	0.06929	G	A	14	389	2606
rs17566772	17	36276907	KRT12	0.08536	A	G	16	481	2508
rs238824	17	36600044	KRTAP9-1	0.06967	A	G	11	409	2673
rs8071814	17	36830741	KRT37	0.07843	A	G	15	442	2552
rs897416	17	36847294	KRT38	0.09797	T	C	31	527	2448
rs1553469	17	38096288	CNTNAP1	0.07295	T	G	30	391	2670
rs33986943	17	38258163	AOC3	0.09933	A	G	33	527	2425
rs4986850	17	38498997	BRCA1	0.0781	A	G	17	436	2556
rs1799950	17	38500007	BRCA1	0.06152	G	A	12	346	2649
rs398825	17	39340707	KRTAP4-1	0.06962	G	A	11	397	2601
rs17546822	17	40364496	KIF18B	0.0861	C	T	22	474	2512
rs17763658	17	41278420	IMP5	0.06763	A	G	11	382	2594
rs3883318	17	42845250	C17orf57	0.06501	A	G	17	357	2633
rs1135034	17	45138662	SLC35B1	0.09322	A	G	21	519	2469
rs6504191	17	59394800	SCN4A	0.09703	T	C	41	493	2429
rs1140409	17	59927132	DDX5	0.06723	G	T	20	376	2698
rs8178847	17	61647277	APOH	0.06367	A	G	12	370	2712
rs1801692	17	61652626	APOH	0.04107	A	G	14	219	2774
rs11653020	17	62535205	HELZ	0.07293	G	A	16	419	2657
rs10491178	17	64661568	ABCA10	0.05126	T	C	13	291	2788
rs12449858	17	76121318	TMC6	0.08419	A	G	26	454	2525
rs8072110	17	77966666	C17orf101	0.07783	T	G	18	445	2627
rs11546280	17	79671714	MRPL12	0.06265	C	T	16	345	2648
rs3765623	18	3076065	MYOM1	0.07256	T	C	18	413	2663
rs2229333	18	3447607	TGIF1	0.0573	T	C	19	306	2677
rs329003	18	9560320	PPP4R1	0.09893	G	A	32	548	2513
rs17202961	18	19678989	LAMA3	0.06691	A	C	15	372	2617
rs11662595	18	20310968	HRH4	0.08942	G	A	26	501	2565
rs677688	18	22020543	IMPACT	0.06864	C	G	15	382	2604
rs2852003	18	26866227	DSC3	0.07094	T	G	13	413	2668
rs2230234	18	27358712	DSG2	0.08325	G	A	13	489	2591
rs1800458	18	27426863	TTR	0.08565	A	G	17	496	2581
rs3737466	18	31956160	SLC39A6	0.06464	T	C	20	360	2714
rs12606417	18	42358435	LOXHD1	0.098	C	T	39	511	2455
rs10163657	18	42435225	LOXHD1	0.08985	T	C	19	518	2557
rs1942418	18	45637241	MYO5B	0.04783	A	G	12	272	2810
rs1657907	18	51888169	C18orf54	0.06547	C	G	18	358	2633
rs33969768	18	56191053	ALPK2	0.0555	A	G	14	306	2689
rs1065205	18	59473975	SERPINB3	0.08743	G	A	19	488	2501
rs2158367	19	941281	WDR18	0.05984	G	A	12	336	2660
rs45574836	19	1806667	ATP8B3	0.05271	T	C	11	295	2701
rs3746101	19	2001823	MKNK2	0.07288	T	G	15	421	2658
rs35121757	19	2254458	JSRP1	0.05683	T	C	12	318	2679
rs353693	19	4168207	ANKRD24	0.07988	T	G	12	470	2610
rs11085147	19	5662930	LONP1	0.09906	A	G	32	549	2513
rs12980262	19	5844058	NDUFA11	0.0873	A	G	22	481	2504
rs7540	19	6325890	ALKBH7	0.09207	A	G	22	525	2543
rs12608960	19	6706155	SH2D3A	0.09438	C	T	18	548	2528
rs36097961	19	6850767	VAV1	0.08162	A	G	15	461	2532
rs1799815	19	7125519	INSR	0.06863	T	C	13	387	2609
rs35202360	19	8197983	FBN3	0.09206	T	C	22	510	2477
rs1344572	19	8931194	MUC16	0.05838	A	G	12	337	2743
rs7246969	19	9086940	OR7G1	0.06723	A	G	25	366	2703
rs7246980	19	9086973	OR7G1	0.06725	A	G	25	366	2702
rs12720356	19	10330975	TYK2	0.09551	G	T	21	549	2524
rs17616661	19	11164554	KANK2	0.0878	G	A	24	480	2503
rs12609039	19	11209960	DOCK6	0.07536	A	G	12	442	2638
rs400106	19	11804697	ZNF440	0.07134	G	A	14	412	2658
rs3745652	19	12552335	ZNF490	0.08195	T	C	16	461	2531
rs16027	19	13258560	CACNA1A	0.0912	A	G	19	524	2538
GA034072	19	14026204	PALM3	0.09694	C	G	23	537	2447
rs2304200	19	15580658	PGLYRP2	0.08218	T	C	19	451	2505
rs1806931	19	15700365	OR10H2	0.05591	A	G	12	322	2760
rs2240227	19	15713242	OR10H3	0.05575	A	C	12	321	2761
rs3093153	19	15862215	CYP4F2	0.06208	T	G	13	358	2722
rs4808641	19	17408292	TMEM221	0.04621	A	G	12	254	2742
rs36070283	19	18876258	CRTC1	0.09012	A	G	22	498	2487
rs11672238	19	22638628	ZNF492	0.07451	A	C	14	417	2555
rs409093	19	35941248	FFAR2	0.08192	A	T	21	451	2537
rs2267586	19	40851208	UPK1A	0.09026	G	T	30	498	2563
rs2227278	19	40897890	ZBTB32	0.09987	C	A	39	540	2515
rs268674	19	40900865	PRX	0.06267	G	A	11	355	2642
rs1800471	19	41858876	TGFB1	0.07976	C	G	17	442	2525
rs3810151	19	42728836	ZNF526	0.09239	G	A	25	506	2478
rs11666245	19	42921766	ZNF573	0.04579	A	G	12	259	2819
rs2229259	19	43998943	ECH1	0.09548	A	G	27	520	2459
rs1799782	19	44057574	XRCC1	0.06032	T	C	15	333	2661
rs34378208	19	49398405	TULP2	0.08043	T	C	14	456	2539
rs2571174	19	49626329	ZNF229	0.09754	C	T	27	533	2449
rs12984558	19	52548176	DHX34	0.06206	T	C	18	348	2728
rs10423255	19	54137586	DHDH	0.06366	T	C	17	349	2642
rs11666735	19	55396913	FCAR	0.07463	A	G	18	413	2577
rs17632542	19	56053569	KLK3	0.06713	C	T	16	372	2621
rs16988799	19	56195097	KLK8	0.05291	T	C	11	296	2698
rs1048328	19	56219176	KLK11	0.07598	T	C	13	444	2636
rs3745539	19	56219853	KLK11	0.07339	T	C	19	416	2658
rs2005199	19	56725018	SIGLEC6	0.06741	A	G	13	391	2689
rs35089861	19	59353855	LENG1	0.05916	T	C	13	330	2666
rs2278428	19	60109866	NCR1	0.07143	C	A	15	412	2667
rs4644955	19	60430446	TMEM86B	0.09228	T	C	20	531	2543
rs12462372	19	61065274	NLRP4	0.05107	A	G	13	290	2791
rs4801478	19	62601684	ZNF548	0.06666	G	A	11	379	2618
rs10414451	19	62823388	ZNF134	0.08371	C	T	19	480	2595
rs34871842	19	63044815	ZNF587B	0.08943	A	G	20	498	2490
rs35430780	19	63719974	ZBTB45	0.05417	C	G	11	304	2694
rs1060742	2	20052496	WDR35	0.0899	C	T	28	485	2496
rs3731625	2	24292552	ITSN2	0.07898	C	T	23	429	2555
rs41281481	2	24435599	ITSN2	0.04703	A	G	12	259	2738
rs12623642	2	26529899	CCDC164	0.06717	T	G	14	384	2669
rs7577483	2	29128234	FAM179A	0.08261	T	G	27	457	2609
rs2276568	2	30810830	CAPN13	0.06531	G	A	11	382	2700
rs207440	2	31415916	XDH	0.05866	A	G	12	329	2668
rs2273664	2	32836984	TTC27	0.07908	A	G	22	445	2625
rs3770761	2	37360443	PRKD3	0.05533	C	T	15	303	2691
rs1056104	2	38862453	GEMIN6	0.07579	A	G	24	421	2649
rs11893062	2	39088323	DHX57	0.071	A	G	13	400	2587
rs10202624	2	42368892	EML4	0.09295	A	G	19	537	2537
rs6756629	2	43918594	ABCG5	0.06482	A	G	16	369	2708
rs17617459	2	63514406	WDPCP	0.06796	T	C	17	375	2617
rs17006436	2	70913619	CD207	0.05532	A	G	13	316	2762
rs11547160	2	85389926	TCF7L1	0.06143	T	C	20	340	2733
rs955592	2	85449329	ELMOD3	0.07191	T	C	11	423	2660
rs11692435	2	97641786	ACTR1B	0.07999	A	G	24	447	2623
rs17428626	2	98928429	VWA3B	0.06154	G	C	11	348	2647
rs1013940	2	107975080	SLC5A7	0.08945	C	T	27	499	2565
rs35898499	2	112656372	MERTK	0.04938	T	A	11	275	2721
rs36093393	2	113520129	CKAP2L	0.08259	A	G	20	457	2532
rs17512204	2	118449301	CCDC93	0.0781	A	G	19	432	2558
rs33975708	2	118743630	CCDC93	0.08192	A	G	21	451	2537
rs17534123	2	128238677	WDR33	0.09076	T	C	29	488	2491
rs272128	2	131204143	GPR148	0.07905	T	G	16	457	2620
rs13024801	2	160313182	2013-03-07	0.07062	A	G	18	389	2602
rs1397706	2	160437251	LY75	0.08374	A	G	19	480	2594
rs35941588	2	160673519	LY75	0.08092	T	C	26	435	2548
rs2084543	2	162404660	SLC4A10	0.0721	A	G	19	408	2666
rs34693334	2	170147502	LRP2	0.06865	C	G	13	387	2608
rs3754913	2	170375059	SSB	0.07538	G	A	23	409	2586
rs17304212	2	179033981	DFNB59	0.08209	T	C	25	444	2540
rs17362588	2	179429291	CCDC141	0.09382	A	G	31	518	2542
rs1046356	2	180518447	CWC22	0.06592	A	G	11	385	2691
rs12999160	2	186369812	FSIP2	0.08258	A	G	22	467	2605
rs13010627	2	202074098	CASP10	0.07428	A	G	22	403	2584
rs34218846	2	209108317	IDH1	0.05932	T	C	14	329	2666
rs2276635	2	219795685	ATG9A	0.08794	C	T	16	512	2565
rs1801278	2	227368788	IRS1	0.06891	A	G	12	390	2602
rs11677877	2	227839413	COL4A3	0.07627	G	A	18	423	2568
rs34505188	2	228128568	COL4A3	0.07051	A	G	18	383	2570
rs3948463	2	230745104	SP110	0.07277	A	G	16	418	2658
rs4972946	2	230857352	SP140	0.09926	G	A	36	542	2515
rs17275036	2	231114314	SP100	0.09661	A	G	33	515	2459
rs17863822	2	234414522	HJURP	0.06879	G	C	16	382	2611
rs36104025	2	238247734	COL6A3	0.09328	G	C	24	513	2470
rs3739070	2	238971007	TRAF3IP1	0.08878	C	A	22	505	2565
rs2286323	2	241685470	MTERFD2	0.08452	G	A	27	469	2598
rs17717241	20	1172774	RAD21L1	0.08083	C	A	15	470	2608
rs4814111	20	1240989	SDCBP2	0.07256	T	C	15	419	2660
rs41275406	20	1456970	SIRPB2	0.05745	T	C	11	322	2661
rs2076405	20	2323262	TGM6	0.07519	T	C	22	421	2649
rs2273137	20	2583212	NOP56	0.07773	C	T	22	437	2635
rs3918396	20	3651765	ADAM33	0.09192	A	G	22	509	2477
rs16991615	20	5896227	MCM8	0.05876	A	G	16	331	2742
rs35413391	20	6069723	FERMT1	0.0771	T	C	22	420	2567
rs1135711	20	7964476	TMX4	0.06265	G	A	17	343	2649
rs11700112	20	9547018	PAK7	0.08231	G	C	15	465	2527
rs11537702	20	17427617	BFSP1	0.08436	T	C	22	478	2594
rs34246888	20	17602571	RRBP1	0.05916	C	T	17	322	2670
rs17757442	20	23369101	CSTL1	0.07594	A	G	12	433	2564
rs3746737	20	23372638	CSTL1	0.07595	T	C	13	444	2637
rs746748	20	25230967	ABHD12	0.06464	T	C	12	376	2706
rs17857107	20	25382139	NINL	0.09754	T	C	28	531	2450
rs11907253	20	29696334	COX4I2	0.07805	A	G	13	457	2624
rs867186	20	33228215	PROCR	0.08901	G	A	21	507	2556
rs12481228	20	33682087	CPNE1	0.09654	C	G	31	519	2459
rs17431878	20	33965521	PHF20	0.09365	A	G	32	499	2475
rs2425068	20	34214723	CPNE1	0.06896	C	T	18	379	2612
rs5743509	20	36373728	BPI	0.05272	T	C	11	304	2777
rs2232580	20	36408359	LBP	0.0926	T	C	25	523	2546
rs2232613	20	36431069	LBP	0.08569	T	C	18	479	2508
rs2230782	20	45698295	NCOA3	0.08962	C	G	23	493	2491
rs17440813	20	56169165	C20orf85	0.06641	G	A	15	369	2620
rs875379	20	60335381	LAMA5	0.09085	A	G	30	502	2561
rs944893	20	60335784	LAMA5	0.08975	T	C	28	499	2565
rs6089219	20	60399713	CABLES2	0.07549	G	T	13	428	2566
rs438363	20	61668792	PRIC285	0.09408	G	A	26	517	2481
rs3848668	20	61763716	RTEL1	0.08369	G	A	14	475	2516
GA017432	20	61791633	RTEL1	0.07784	T	C	21	426	2559
rs2824804	21	18692433	TMPRSS15	0.09341	C	T	24	530	2540
rs9636845	21	31175384	KRTAP11-1	0.08913	T	A	26	484	2497
rs2070417	21	31560420	TIAM1	0.1014	A	C	27	573	2493
rs2070418	21	31560421	TIAM1	0.1013	T	C	27	573	2494
rs1041439	21	39493116	BRWD1	0.06884	A	G	19	388	2687
rs34613278	21	40720494	HMGN1	0.07951	T	C	20	438	2548
rs228104	21	42859024	SLC37A1	0.09777	C	T	30	545	2519
rs12483377	21	45755537	COL18A1	0.09114	A	G	30	504	2560
rs1633399	22	17563787	CLTCL1	0.07159	G	A	11	421	2662
rs712952	22	17577949	CLTCL1	0.07143	A	G	11	420	2663
rs807459	22	17603352	CLTCL1	0.07143	C	T	11	420	2663
rs35665085	22	17625915	CECR5	0.05863	A	G	12	328	2662
rs447017	22	20100158	TRMT2A	0.06208	C	G	14	342	2624
rs1892723	22	23475453	PIWIL3	0.09438	G	A	26	532	2536
rs13058434	22	24494413	MYO18B	0.08457	T	C	20	483	2589
rs17704912	22	24561312	MYO18B	0.07212	C	G	17	400	2592
rs11549795	22	28551120	ASCC2	0.08506	A	G	27	472	2593
rs36571	22	30200713	ASCC2	0.08508	A	G	26	460	2523
rs16989291	22	30301282	SFI1	0.06998	C	T	15	391	2602
rs17683011	22	30775946	SLC5A1	0.07733	G	A	19	426	2555
rs16989427	22	32108475	PRR14L	0.05468	T	C	14	300	2685
rs17683430	22	32487700	SLC5A1	0.07754	A	G	19	428	2558
rs2307340	22	34132661	MCM5	0.08076	G	C	17	452	2540
rs3747203	22	42463119	EFCAB6	0.06191	C	T	12	359	2722
rs2076213	22	42654255	PNPLA3	0.08872	C	A	19	511	2564
rs6151415	22	49412227	ARSA	0.07663	T	G	17	427	2564
rs28470336	22	50722167	PLXNB2	0.06433	C	T	12	363	2633
rs696217	3	10306457	GHRL	0.07902	T	G	21	447	2626
rs34230332	3	14725878	C3orf20	0.07145	G	A	19	392	2598
rs2303857	3	32553509	DYNC1LI1	0.0787	G	A	19	449	2626
rs2070492	3	38332821	SLC22A14	0.09421	T	C	32	519	2543
rs2228467	3	42881120	CCBP2	0.06351	C	T	13	367	2714
rs17409162	3	43566331	ANO10	0.06208	A	G	11	350	2635
rs1129183	3	45844976	LZTFL1	0.08278	A	G	21	456	2531
rs11711953	3	48015287	MAP4	0.07875	T	C	16	455	2621
rs164637	3	52240255	TWF2	0.05055	T	C	13	278	2716
rs13060192	3	52378540	DNAH1	0.05022	C	G	14	274	2719
rs419752	3	52404705	DNAH1	0.05103	T	C	13	281	2714
rs7630214	3	52554304	STAB1	0.0681	G	C	21	367	2615
rs1043261	3	53874316	IL17RB	0.08355	T	C	19	479	2596
rs12488237	3	56089901	ERC2	0.05103	C	T	16	275	2717
rs17801309	3	89604354	EPHA3	0.08112	A	G	18	452	2538
rs9838238	3	100083075	DCBLD2	0.05184	C	T	11	290	2708
rs17429033	3	113193088	ABHD10	0.06967	G	A	19	381	2607
rs33990195	3	113320477	SIDT1	0.09006	T	C	21	500	2488
rs1042636	3	123486459	CASR	0.08048	G	A	24	450	2620
rs16830494	3	131844546	COL6A6	0.09228	A	G	22	511	2474
rs16851435	3	142644875	ZBTB38	0.09957	G	T	30	539	2439
rs343320	3	147717599	PLSCR1	0.07743	T	C	18	430	2561
rs1055153	3	150857563	WWTR1	0.06666	T	G	15	371	2622
rs4855271	3	166197226	SI	0.085	C	T	24	478	2592
rs3732933	3	186393845	EHHADH	0.08064	G	A	26	447	2621
rs16844152	4	3318726	RGS12	0.04968	T	A	11	277	2721
rs16844401	4	3419450	HGFAC	0.06402	A	G	11	374	2708
rs2272739	4	4327376	LYAR	0.07311	T	G	19	402	2588
rs2291157	4	5771922	EVC	0.09163	G	T	24	519	2551
rs17807493	4	13603591	BOD1L	0.03773	T	C	11	205	2792
rs2232025	4	24614552	LGI2	0.06084	T	C	12	342	2654
rs1995319	4	35968413	DTHD1	0.07915	T	A	15	446	2546
rs13110318	4	37815251	TBC1D1	0.09104	A	G	21	521	2550
rs35859249	4	37904089	TBC1D1	0.08675	T	C	23	474	2500
rs2348353	4	44346787	YIPF7	0.07385	T	C	27	403	2664
rs17462252	4	47265633	ATP10D	0.06768	A	G	16	375	2616
rs35012290	4	47538044	ATP10D	0.07663	A	G	16	429	2563
rs33932471	4	66509085	EPHA5	0.06981	G	T	15	390	2603
rs1056787	4	68062665	CENPC1	0.09922	A	G	28	557	2504
rs1048152	4	71114956	CSN3	0.0866	T	G	33	455	2520
rs2291182	4	71236237	CABS1	0.07515	G	T	12	441	2641
rs7660807	4	71423140	AMTN	0.0787	G	A	15	457	2622
rs12507099	4	79832706	BMP2K	0.08511	G	C	17	477	2508
rs13107325	4	103407732	SLC39A8	0.07951	T	C	16	460	2618
rs2276970	4	106510470	ARHGEF38	0.0879	G	A	28	473	2508
rs17669218	4	113744172	C4orf21	0.1014	A	G	27	573	2492
rs17594503	4	119422669	PRSS12	0.06248	T	C	13	350	2646
rs6848868	4	123369736	KIAA1109	0.0881	C	T	25	480	2503
rs1014867	4	126632341	FAT4	0.06106	T	C	11	355	2721
rs3208941	4	140188094	C4orf49	0.07062	A	G	14	397	2598
rs2270565	4	141483471	UCP1	0.07979	A	T	17	446	2545
rs34561493	4	143043397	INPP4B	0.08175	T	C	22	448	2539
rs2276932	4	149203771	ARHGAP10	0.07062	C	T	20	397	2677
rs17540213	4	169561808	DDX60L	0.07582	A	T	16	424	2567
rs4862155	4	184473862	WWC2	0.06561	A	G	13	380	2701
rs3733406	4	187776582	FAT1	0.07094	C	T	11	417	2666
rs12523402	5	193636	PLEKHG4B	0.08634	A	G	25	467	2502
rs10035612	5	442586	C5orf55	0.07686	C	G	12	431	2517
rs10035653	5	495790	C5orf55	0.08361	A	G	13	477	2518
rs6350	5	1496199	SLC6A3	0.06256	T	C	16	355	2722
rs16903574	5	14663309	FAM105A	0.07662	G	C	20	420	2562
rs10066063	5	32126051	PDZD2	0.09728	A	G	25	551	2513
rs1805327	5	34908877	RAD1	0.06653	G	A	12	376	2618
rs2561111	5	38386400	EGFLAM	0.09909	T	C	24	565	2504
rs6453139	5	74998524	ANKDD1B	0.05204	T	C	14	294	2786
rs7722711	5	75942607	IQGAP2	0.06314	C	T	21	338	2650
rs6453373	5	77460784	AP3B1	0.06903	A	T	15	385	2606
rs16877147	5	79065968	CMYA5	0.06699	T	C	19	365	2624
rs16878594	5	80600619	ZCCHC9	0.09844	G	C	23	546	2438
rs17544552	5	90015274	GPR98	0.07879	T	C	18	438	2552
rs13157270	5	90048135	GPR98	0.08743	A	G	21	499	2574
rs41276257	5	95115959	RHOBTB3	0.09156	T	C	29	493	2487
rs2303138	5	96376466	LNPEP	0.07692	A	G	20	436	2638
rs11746232	5	96389215	LNPEP	0.0966	G	A	27	543	2520
rs12188395	5	96529134	RIOK2	0.08902	C	T	31	473	2501
rs4895362	5	118480316	DMXL1	0.06481	A	G	15	360	2634
rs12514417	5	125915614	ALDH7A1	0.09981	G	T	31	555	2505
rs2291628	5	127637532	FBN2	0.07789	A	G	25	432	2637
rs26008	5	131036093	FNIP1	0.06321	T	C	20	351	2722
rs30489	5	133509366	TCF7	0.07883	T	C	18	451	2620
rs12657663	5	134076812	CAMLG	0.09877	A	G	23	548	2436
rs3776099	5	140483025	PCDHB4	0.07183	T	C	12	408	2587
rs11575963	5	140775312	PCDHGB4	0.07328	C	T	15	411	2583
rs3822357	5	141224540	PCDH1	0.05931	A	G	13	341	2740
rs17104742	5	145875751	GPR151	0.07119	A	G	19	389	2591
rs17572019	5	149192664	PPARGC1B	0.08638	A	G	22	475	2507
rs2071240	5	149755744	TCOF1	0.08012	C	G	15	452	2541
rs11748836	5	153362041	FAM114A2	0.06893	T	C	17	391	2675
rs17641488	5	154183314	C5orf4	0.09265	T	C	27	503	2476
rs6873053	5	156309281	TIMD4	0.07711	A	G	27	423	2643
rs10515808	5	159753509	C5orf54	0.0992	A	C	13	571	2425
rs2303078	5	162833734	HMMR	0.04571	A	G	12	251	2745
rs11739136	5	169743374	KCNIP1	0.1008	T	C	30	564	2500
rs35420613	5	174936038	SFXN1	0.06929	C	T	14	389	2606
rs17078875	5	178342556	GRM6	0.0683	T	C	11	389	2609
rs17078874	5	178409927	GRM6	0.08763	T	C	12	503	2492
rs17714046	5	180594586	TRIM41	0.05268	C	T	15	287	2707
rs17136239	6	601343	EXOC2	0.06435	C	T	14	359	2634
rs1766848	6	601555	EXOC2	0.09725	T	G	36	529	2525
rs3798751	6	11050950	SYCP2L	0.05303	G	A	14	291	2703
rs16879902	6	17796672	NUP153	0.09049	T	C	21	502	2483
rs214585	6	18323282	KDM1B	0.06644	A	G	18	375	2700
rs2076506	6	22678043	HDGFL1	0.07131	T	C	18	405	2669
rs3761788	6	24523359	MRS2	0.08293	T	C	23	467	2603
rs13195509	6	26571639	BTN2A1	0.09185	A	G	21	526	2545
rs12191414	6	27386613	POM121L2	0.07998	G	C	20	441	2546
rs9461446	6	28335612	NKAPL	0.04622	T	C	11	264	2819
rs2232434	6	28466872	ZSCAN12	0.04788	G	A	11	274	2806
rs2232430	6	28467165	ZSCAN12	0.07145	A	G	17	408	2668
rs2232423	6	28474130	ZSCAN12	0.08414	C	T	18	470	2519
rs3749971	6	29450754	OR12D3	0.09508	T	C	25	538	2529
rs404240	6	29631936	UBD	0.09591	C	T	25	527	2456
rs3130253	6	29741991	MOG	0.08907	A	G	16	519	2558
rs3734838	6	30188210	TRIM31	0.07741	A	G	21	437	2636
rs3094134	6	30230133	TRIM10	0.09654	A	G	27	527	2455
rs9262138	6	30735846	DHX16	0.05802	C	T	14	331	2749
rs2233984	6	31187243	C6orf15	0.06662	A	G	17	378	2697
rs2233976	6	31187973	C6orf15	0.07827	A	G	21	429	2559
rs1265096	6	31214468	PSORS1C1	0.08076	T	C	20	446	2543
rs130072	6	31220463	CCHCR1	0.07194	A	G	18	408	2660
rs2027937	6	31224481	CCHCR1	0.06718	A	G	17	370	2620
rs2073724	6	31237686	TCF19	0.0721	T	C	18	410	2665
rs3132453	6	31712023	PRRC2A	0.07711	A	C	27	423	2643
rs9267532	6	31747958	LY6G5B	0.06935	T	C	15	399	2679
rs2075789	6	31816307	MSH5	0.09165	A	G	22	505	2468
rs2075798	6	31954720	SLC44A4	0.06863	T	G	15	383	2611
rs2070600	6	32259421	AGER	0.06059	A	G	14	345	2719
rs4148876	6	32904770	TAP2	0.07951	T	C	25	442	2627
rs3116713	6	33490266	PHF1	0.09551	G	A	34	523	2537
rs2296916	6	42003128	BYSL	0.09648	A	G	17	563	2514
rs3828855	6	42008384	BYSL	0.09719	A	G	17	567	2508
rs2307331	6	52252180	MCM3	0.06846	A	G	17	378	2614
rs17851770	6	52465030	EFHC1	0.08976	C	A	22	496	2490
rs35471617	6	56033094	COL21A1	0.0668	A	G	20	362	2627
rs41271862	6	56373536	DST	0.05574	T	C	12	311	2682
rs35523808	6	75834971	COL12A1	0.0557	T	A	13	309	2685
rs6941356	6	88024355	ZNF292	0.09576	G	A	28	536	2527
rs12530146	6	90465463	MDN1	0.07121	T	C	13	401	2584
rs783396	6	107094063	AIM1	0.07032	A	C	15	405	2673
rs2334321	6	110674102	C6orf186	0.08888	A	G	29	492	2573
rs458017	6	111802784	REV3L	0.05918	C	T	17	332	2743
rs13190932	6	112019763	TRAF3IP2	0.05269	A	G	13	291	2704
rs11757455	6	112629545	LAMA4	0.06497	A	G	15	361	2633
rs6907580	6	117256701	GPRC6A	0.06608	A	G	16	365	2623
rs2243380	6	117831072	ROS1	0.08533	A	G	18	492	2584
rs2873479	6	123728987	TRDN	0.09648	A	C	25	547	2522
rs2236026	6	127810165	SOGA3	0.07662	A	G	16	442	2635
rs8192627	6	132916507	TAAR8	0.07046	C	A	18	400	2676
rs8192624	6	132933946	TAAR6	0.08341	A	G	20	476	2597
rs652921	6	149772539	TAB2	0.09574	T	C	31	514	2463
rs28385621	6	152658141	SYNE1	0.08026	A	C	26	431	2552
rs17082709	6	152777095	SYNE1	0.06202	C	A	13	347	2647
rs768994	6	159319336	RSPH3	0.07627	C	T	19	421	2569
rs16889320	6	159334887	RSPH3	0.07627	C	T	19	421	2569
rs12208357	6	160543148	SLC22A1	0.07048	T	C	13	398	2597
rs2235197	6	167629692	UNC93A	0.08554	A	G	23	483	2586
rs2073634	6	168185614	KIF25	0.08314	A	G	22	469	2594
rs902393	6	168206473	FRMD1	0.07847	A	G	14	456	2614
rs34987335	6	169634896	THBS2	0.05749	T	C	13	320	2676
rs3800544	6	169800299	WDR27	0.06434	T	C	14	370	2709
rs11772411	7	4825307	KIAA0415	0.0589	A	T	12	330	2663
rs10486180	7	7528105	COL28A1	0.07159	C	T	18	407	2669
rs7804532	7	7537619	COL28A1	0.06217	G	C	13	348	2647
rs4721888	7	20201395	MACC1	0.07976	C	G	20	440	2549
rs16881810	7	22533397	STEAP1B	0.09677	C	T	29	524	2454
rs13243961	7	23206788	NUPL2	0.09691	A	G	24	535	2449
rs12540919	7	24723476	DFNA5	0.09632	T	C	30	536	2528
rs2070607	7	44714103	OGDH	0.05253	A	G	12	292	2704
rs3807550	7	50628281	GRB10	0.1001	T	C	27	548	2433
rs2293347	7	55236410	EGFR	0.09777	A	G	28	549	2517
rs17855988	7	73474825	ELN	0.09325	C	G	26	509	2473
rs2075761	7	76666889	FGL2	0.08675	A	G	23	474	2500
rs7785206	7	87021023	CROT	0.06948	C	G	17	384	2607
rs6465770	7	99852647	ZCWPW1	0.06868	C	T	15	395	2684
rs4729631	7	100635205	MUC12	0.06102	T	C	20	327	2660
rs35310665	7	102108263	LRWD1	0.07953	G	A	23	431	2545
rs3087615	7	102739359	PMPCB	0.08428	A	C	26	469	2596
rs1029396	7	116812056	ASZ1	0.08406	G	T	23	474	2596
rs2291569	7	128488734	FLNC	0.0883	A	G	22	486	2493
rs3212300	7	130842001	PODXL	0.07501	C	T	21	422	2650
rs4728329	7	133876367	AKR1B10	0.08425	A	G	26	469	2597
rs35149449	7	133906669	LRGUK	0.07876	T	C	19	436	2554
rs269243	7	139948200	DENND2A	0.06432	G	T	15	368	2711
rs6967117	7	142798989	EPHA1	0.07283	T	C	14	410	2583
rs34372369	7	142802391	EPHA1	0.04902	A	G	11	273	2725
rs3801979	7	148851273	ZNF398	0.08245	C	G	22	452	2534
rs709065	7	149058342	KRBA1	0.08059	T	G	21	443	2545
rs1860871	7	150020526	GIMAP2	0.08277	G	A	22	468	2603
rs1049742	7	150185486	ABP1	0.07682	T	C	22	418	2567
rs17545756	7	150363745	ABCB8	0.06282	T	C	11	366	2711
rs3218536	7	151976940	XRCC2	0.08665	A	G	28	480	2585
rs2072174	8	186274	ZNF596	0.09272	G	T	30	498	2481
rs17683288	8	1864887	ARHGEF10	0.0665	G	T	13	373	2614
rs17711777	8	10660650	PINX1	0.0768	C	T	20	422	2566
rs1139354	8	12600720	LONRF1	0.08178	A	T	23	446	2539
rs505480	8	12923214	KIAA1456	0.05876	T	G	11	333	2677
rs17057523	8	27584365	SCARA3	0.06298	C	T	12	355	2642
rs4732748	8	27689983	ESCO2	0.09198	T	C	30	509	2554
rs2304877	8	41685595	ANK1	0.05979	A	G	11	348	2735
rs11545078	8	64101318	GGH	0.09305	T	C	26	508	2475
rs17332410	8	67796120	C8orf45	0.07427	G	C	17	411	2568
rs3735972	8	87657314	CNGB3	0.0922	G	A	24	522	2545
rs13265557	8	87729216	CNGB3	0.06217	C	T	13	348	2647
rs35120814	8	99030320	MATN2	0.05484	A	G	12	306	2691
rs17803441	8	104486221	SLC25A32	0.08192	T	C	22	449	2538
rs34660136	8	110283353	NUDCD1	0.09355	G	T	29	505	2475
rs10283100	8	120665204	ENPP2	0.05886	A	G	11	332	2664
rs2272722	8	124100722	DERL1	0.08134	C	T	17	469	2606
rs6995099	8	124779845	ANXA13	0.08403	T	C	25	470	2599
rs10111520	8	139818981	COL22A1	0.06148	T	G	12	346	2651
rs11549789	8	144760432	PYCRL	0.06368	A	G	16	351	2640
rs10115703	9	14712616	CER1	0.08533	A	G	19	490	2585
rs3087653	9	15449821	SNAPC3	0.04488	C	A	11	248	2749
rs3808782	9	17330864	CNTLN	0.0902	A	G	31	496	2566
rs17818730	9	19336710	DENND4C	0.09141	G	A	19	511	2473
rs1125488	9	21471556	IFNE	0.07662	C	A	21	432	2640
rs11547035	9	34449025	DNAI1	0.06222	T	G	12	361	2721
rs2070074	9	34639442	GALT	0.088	G	A	24	496	2571
rs16932912	9	36077876	RECK	0.07478	A	G	20	409	2573
rs34789048	9	36169723	CCIN	0.09866	T	C	34	523	2438
rs25688	9	73550054	TMEM2	0.08193	A	G	18	471	2605
rs25691	9	74354983	TMEM2	0.08657	C	T	21	479	2509
rs11145014	9	79318995	PRUNE2	0.07796	T	C	17	435	2556
rs2228173	9	84267147	TLE1	0.09724	A	G	32	521	2455
rs12236219	9	96102802	ZNF169	0.04623	T	C	12	262	2819
rs12350212	9	96103449	ZNF169	0.09807	C	G	36	518	2454
rs10987769	9	101570336	GALNT12	0.09292	T	A	27	505	2476
rs11545137	9	101984146	ALG2	0.0815	C	T	24	442	2540
rs13293961	9	104807170	CYLC2	0.05884	T	G	21	322	2750
rs2228083	9	116152940	ALAD	0.0827	T	C	27	443	2535
rs4986791	9	119515423	TLR4	0.05967	T	C	19	321	2668
rs1043379	9	120970128	DBC1	0.06561	T	C	14	378	2702
rs17612	9	122765747	C5	0.07527	C	A	11	431	2567
rs1236913	9	124173300	PTGS1	0.07064	T	C	21	395	2677
rs4836891	9	124313395	OR1J2	0.07618	A	G	18	422	2566
rs727913	9	124417555	OR1Q1	0.06448	G	A	11	377	2706
rs2480452	9	130949557	PPP2R4	0.07662	A	G	19	436	2638
rs11539209	9	131483551	ZDHHC12	0.07943	T	A	23	432	2554
rs11243875	9	132236202	HMCN2	0.08843	T	C	27	478	2503
rs11243406	9	133380691	POMT1	0.06048	A	C	13	348	2731
rs3739921	9	134193659	SETX	0.07893	T	C	13	449	2547
rs3739916	9	134266828	TTF1	0.06434	A	G	14	370	2709
rs35898523	9	135019466	GBGT1	0.07428	A	C	15	417	2577
rs17150554	9	135258964	C9orf96	0.08876	A	G	28	478	2502
rs28647808	9	135295351	ADAMTS13	0.08908	G	C	26	480	2480
rs3094378	9	135326989	SLC2A6	0.0926	T	C	34	505	2555
rs17040344	9	137655940	GLT6D1	0.07915	A	G	22	432	2553
rs4962237	9	139478402	PNPLA7	0.07594	A	G	20	417	2572
rs45449193	9	139748483	MAMDC4	0.08788	A	G	20	488	2496

## Sheet: Supplemental Table 3
	Hypercoaguable data set in African Americans	Cancer data set in whites	Comments
SNP exclusions
Total SNPs on genotyping platform(s)	1016029	970521
SNP excluded with MAF>10%	774353	607330
SNPs excluded with <=10 HZ		279348	The range of MAFs for excluded nSNPs was 1-10%.
SNPs excluded with <=9 HZ	191065		The range of MAFs for excluded nSNPs was 1-10%.
Non missense SNPs excluded	49798	82322
SNPs excluded with MAF>0.10 in other races	380	688
SNPs remaining	433	833
Other SNP characteristics
SNPs with > 10 heterozygotes but few or no minor allele homozygotes for SNPs with MAF<10%.		127244
SNPs with > 9 heterozygotes but few or no minor allele homozygotes for SNPs with MAF<10%.	190996

## Sheet: Supplemental table 4
Diagnosis group	Mechanistic phenotype	ICD9Codes
Acute but ill-defined cerebrovascular accident	Thrombosis	436. 346.60
Acute myocardial infarction	Thrombosis	412. 410.31 410.02 410.81 410.20 410.90 410.82 410.80 410.9 410.22 410.10 410.61 410.51 410. 410.52 410.62 410.42 410.11 410.40 410.91 410.30 410.12 410.41 410.01 410.60 410.72 410.00 410.32 410.70 410.92 410.71 410.21
Aortic and peripheral arterial embolism or thrombosis	Thrombosis	444.1 444.81 444.89 445.89 445.81 444.22 444.21 444.9 445.02 445.01
Budd-Chiari syndrome	Thrombosis	453.0
Coagulation defects	Thrombosis	286.
Congenital deficiency of other clotting factors	Thrombosis	286.3
Congenital factor IX disorder	Thrombosis	286.1
Congenital factor VIII disorder	Thrombosis	286.0
Defibrination syndrome	Thrombosis	286.6
Encounter for long-term (current) use of anticoagulants	Thrombosis	V58.61
Missed abortion	Thrombosis	632.
Occlusion of cerebral arteries (thrombotic)	Thrombosis	434.0 434.01 434.00
Occlusion of cerebral arteries (Embolic)	Thrombosis	434.1 434.10 434.11
Occlusion of cerebral arteries (without infarct)	Thrombosis	434.91 434.90
Occlusion of cerebral arteries (occlusion and stenosis)	Thrombosis	433.90 433.30 433.00 433.81 433.20 433.21 433.10 433.01 433.80 433.31 433.11 434. 433.91
Other venous embolism and thrombosis	Thrombosis	453.40 453.51 453.82 453.2 453.71 453.74 453.89 453.42 453.72 453.50 453.85 453.87 453.76 453.41 453.86 453.77 V12.51 453.52 453.3 453.9 453.84 453.75 453.79 453.83
Portal vein thrombosis	Thrombosis	452.
Prim hypercoagulable st	Thrombosis	289.81
Pulmonary heart disease	Thrombosis	415.19 415.1
Spontaneous abortion	Thrombosis	634.01 634.12 634.81 634.92 634.9 634.11 634.10 634.91 634. 634.22 634.62 634.30 634.72
Thrombophlebitis migrans	Thrombosis	453.1

## Sheet: Supplemental table 5.
Diagnosis group	Mechanistic phenotype assignment	ICD9Codes
Adenomatous polyposis coli	CA	apc.1
Benign neoplasm of islets of Langerhans	CA	211.7
BRCA1 Mutation	CA	brca.1
Cance of limb	CA	195.4 195.5
Cancer of bladder	CA	188. 188.0 188.1 188.2 188.3 188.4 188.5 188.6 188.7 188.8 188.9 233.7 V10.51
Cancer of bone and connective tissue	CA	171. 171.3 171.4 171.5 171.6 171.7 171.8
Cancer of bone and connective tissue	CA	170. 170.0 170.1 170.2 170.3 170.4 170.5 170.6 170.7 170.8 V10.81
Cancer of brain and nervous system	CA	191. 191.0 191.1 191.2 191.3 191.4 191.5 191.8 191.9 192. 192.0 V10.85 V10.86
Cancer of breast	CA	174. 174.0 174.1 174.2 174.3 174.4 174.5 174.6 174.8 174.9 175. 175.0 175.9 233.0 V10.3
Cancer of bronchus; lung	CA	162.2 162.3 162.4 162.5 162.8 162.9 231.2 V10.11
Cancer of cervix	CA	180. 180.0 180.1 180.8 180.9 233.1 795.06 V10.41
Cancer of colon	CA	153. 153.0 153.1 153.2 153.3 153.4 153.6 153.7 153.8 153.9 159.0 230.3 colrec.1 V10.05
Cancer of colon-carcinoid	CA	209.10 209.11 209.12 209.17
Cancer of esophagus	CA	150. 150.0 150.1 150.2 150.3 150.4 150.5 150.8 150.9 230.1 V10.03
Cancer of eye	CA	190.6 190.7 190.8
Cancer of head and neck	CA	149.0 149.1 149.8 149.9 160.0
Cancer of head and neck	CA	195.0 230.0 V10.02 V10.22
Cancer of head and neck-Lip	CA	140.0 140.1 140.3 140.4 140.5 140.6 140.8 140.9
Cancer of head and neck-Tongue	CA	141. 141.0 141.1 141.2 141.3 141.4 141.5 141.6 141.8 141.9 V10.01
Cancer of kidney and renal pelvis	CA	189.0 189.1 209.24 V10.52 V10.53
Cancer of liver and intrahepatic bile duct	CA	155.0 155.1 155.2 230.8 V10.07
Cancer of other female genital organs	CA	181. 183.2 183.3 183.4 183.5 183.8 183.9 184.0 184.1 184.2 184.3 184.4 184.8 184.9 233.30 233.31 233.32 233.39 795.16 V10.40 V10.44
Cancer of other GI organs; GB/biliary system	CA	156.0 156.1 156.2 156.8 156.9
Cancer of other GI organs; intestinal	CA	152.0 152.1 152.2 152.3 152.8 152.9
Cancer of other GI organs; peritoneum	CA	159.8 159.9 230.7 230.9 V10. V10.0 V10.09
Cancer of other GI organs; peritoneum	CA	158.8 158.9
Cancer of other male genital organs	CA	187.1 187.2 187.3 187.4 187.5 187.6 187.7 187.8 187.9 233.5 233.6 V10.45 V10.48 V10.49
Cancer of other urinary organs	CA	189.2 189.3 189.4 189.8 189.9 233.9 V10.50 V10.59
Cancer of ovary	CA	183.0 V10.43
Cancer of pancreas	CA	157. 157.0 157.1 157.2 157.3 157.8 157.9
Cancer of prostate	CA	185. 233.4 V10.46
Cancer of rectum and anus	CA	154.0 154.1 154.2 154.3 154.8 230.4 230.5 230.6 796.70 796.72 796.74 V10.06
Cancer of stomach	CA	151. 151.0 151.1 151.2 151.3 151.4 151.5 151.6 151.8 151.9 230.2 V10.04
Cancer of testis	CA	186. 186.0 186.9 V10.47
Cancer of thyroid	CA	193. V10.87
Cancer of uterus	CA	179. 182.0 182.1 182.8 233.2 V10.42
Cancer; other and unspecified primary	CA	194.4 194.5 194.6
Cancer; other respiratory and intrathoracic	CA	162.0 165.0 231. 231.1 231.8 V10.12 V10.2 V10.20
Carcinoma in situ of eye	CA	234
Carcinoma in situ of larynx	CA	161. 231.0 V10.21
Carcinoma in situ of other specified sites	CA	234.8
Giant cell tumor of tendon sheath	CA	727.02
Kaposi's sarcoma	CA	176. 176.0 176.1 176.2 176.3 176.4 176.5 176.8
Letterer-Siwe disease	CA	202.5 202.50 202.51 202.52 202.53 202.54 202.55 202.56 202.57 202.58
Mal carcinoid bronc/lung	CA	209.21
Mal crcnd prim site unkn	CA	209.2
Malig carcinoid -intestinal	CA	209.00 209.01 209.02 209.03
Malig carcinoid oth site	CA	209.29
Malig carcinoid stomach	CA	209.23
Malig carcinoid thymus	CA	209.22
Malignant histiocytosis	CA	202.3 202.30 202.31 202.32 202.33 202.34 202.35 202.36 202.37 202.38
Malignant mast cell tumors	CA	202.6 202.60 202.61 202.62 202.63 202.64 202.65 202.66 202.67 202.68
Malignant neoplasm gum	CA	143. 143.0 143.1 143.8 145.6
Malignant neoplasm mediastinum	CA	164.2 164.3 164.8 164.9
Malignant neoplasm of adrenal gland	CA	194
Malignant neoplasm of anterior aspect of epiglottis	CA	146.4
Malignant neoplasm of appendix vermiformis	CA	153.5
Malignant neoplasm of auditory tube, middle ear, and mastoid air cells	CA	160.1
Malignant neoplasm of brain stem	CA	191.7
Malignant neoplasm of cerebellum NOS	CA	191.6
Malignant neoplasm of cerebral meninges	CA	192.1
Malignant neoplasm of connective and other soft tissue of upper limb,	CA	171.2
Malignant neoplasm of eye	CA	190. 190.0 190.1 190.2 190.3 190.4 V10.84
Malignant neoplasm of hard palate	CA	145.2
Malignant neoplasm of head sinuses	CA	160.2 160.3 160.4 160.5 160.8 160.9
Malignant neoplasm of heart	CA	164.1
Malignant neoplasm of hypopharynx	CA	148. 148.0 148.1 148.2 148.3 148.8
Malignant neoplasm of islets of Langerhans	CA	157.4
Malignant neoplasm of mouth	CA	145.5 145.8 145.9
Malignant neoplasm of mouth/cheek	CA	144. 144.0 144.1 144.8 145.0
Malignant neoplasm of nasopharynx	CA	147. 147.0 147.1 147.2 147.3 147.8 147.9
Malignant neoplasm of oropharynx	CA	146.5 146.6 146.7 146.8
Malignant neoplasm of oropharynx	CA	146. 146.0 146.1 146.2
Malignant neoplasm of other endocrine glands and related structures	CA	194. V10.88
Malignant neoplasm of other specified sites	CA	195.8
Malignant neoplasm of other specified sites of larynx	CA	161.0 161.1 161.2 161.3 161.8 161.9
Malignant neoplasm of other specified sites of nervous system	CA	192.8
Malignant neoplasm of parathyroid gland	CA	194.1
Malignant neoplasm of pituitary gland and craniopharyngeal duct	CA	194.3
Malignant neoplasm of pleura	CA	163. 163.0 163.1 163.8
Malignant neoplasm of retina	CA	190.5
Malignant neoplasm of retroperitoneum	CA	158
Malignant neoplasm of salivary gland	CA	142.0 142.1 142.2 142.8 142.9
Malignant neoplasm of soft palate	CA	145.3
Malignant neoplasm of spinal cord/meninges	CA	192.2 192.3
Malignant neoplasm of spleen, not elsewhere classified	CA	159.1
Malignant neoplasm of thorax/abdomen/pelvis	CA	195.1 195.2 195.3
Malignant neoplasm of thymus	CA	164
Malignant neoplasm of uvula	CA	145.4
Malignant neoplasm of vallecula	CA	146.3
Malignant neoplasm of vestibule of mouth	CA	145.1
Malignant neoplasm within the respiratory system	CA	165.8 165.9
Malignant neoplasm without specification of site	CA	199. 199.0 199.1 199.2
Mult endo neop (MEN IIA and IIB)	CA	258.02 258.03
Neo retina/choroid NOS	CA	239.81
Neoplasm of uncertain behavior of adrenal gland	CA	237.2
Neoplasm of uncertain behavior of other and unspecified digestive orga	CA	235.5
Neoplasm of uncertain behavior of stomach, intestines, and rectum	CA	235.2
Neoplasm of unspecified nature of endocrine glands and other parts of	CA	239.7
Neoplasm of unspecified nature, site unspecified	CA	239.9
Neoplasms of unspecified nature -- bone/cartilage	CA	238.0 238.1 239.2
Neoplasms of unspecified nature -- breast	CA	238.3 239.3
Neoplasms of unspecified nature -- CNS	CA	237.0 237.1 237.3 237.4 237.5 237.6 237.9 239.6
Neoplasms of unspecified nature -- Lung	CA	235.7 235.9
Neoplasms of unspecified nature -- myeloid	CA	238.6 238.73 238.76 238.77 238.79
Neoplasms of unspecified nature -- oral cavity	CA	235.0 235.1 235.3 235.4 235.6 239.1
Neoplasms of unspecified nature --female reprod	CA	236.0 236.1 236.2 236.3 239.5
Neoplasms of unspecified nature --GU/Kidney	CA	236.7 236.90 236.91 236.99 239.4
Neoplasms of unspecified nature --male reprod	CA	236.4 236.5 236.6
Neoplasms of unspecified nature or uncertain behavior	CA	235.8 239.89
Neoplasms of unspecified nature or uncertain behavior	CA	238.8 238.9 239.
Neurendocrine tumor	CA	209.30 209.70 209.79
Neuroendo tumor	CA	194.9 V10.91
Neurofibromatosis	CA	237.71 237.72
Neurofibromatosis	CA	237.7
Observation for suspected malignant neoplasm	CA	V71.1
Pap smear abnormalities (LGSIL/HGSIL/ASCUS)	CA	795.13 795.14
Sarcoma	CA	170.9 171.0 171.9
Secondary Merkel cell carcinoma	CA	209.75
Burkitt's tumor or lymphoma	HEM	200.2 200.20 200.21 200.22 200.23 200.24 200.25 200.26 200.27 200.28
Hodgkin's disease, lymphocytic depletion	HEM	201.70 201.71 201.72 201.73 201.75 201.76 201.78
Hodgkin's disease, lymphocytic-histiocytic predominance	HEM	201.40 201.41 201.42 201.43 201.44 201.45 201.47 201.48
Hodgkin's disease, mixed cellularity	HEM	201.60 201.61 201.62 201.63 201.64 201.65 201.66 201.68
Hodgkin's disease, nodular sclerosis	HEM	201.50 201.51 201.52 201.53 201.54 201.55 201.56 201.57 201.58
Hodgkin's granuloma	HEM	201.1 201.10 201.11 201.12 201.15 201.16 201.18
Hodgkin's paragranuloma	HEM	201.00 201.01 201.02 201.03 201.04 201.05 201.06 201.07 201.08
Hodgkin's sarcoma, unspecified site, extranodal and solid organ sites	HEM	201.20 201.21 201.23 201.25 201.26 201.28
Hodgkins disease	HEM	201.90 201.91 201.92 201.93 201.94 201.95 201.96 201.97 201.98 V10.72
Leukemia of unspecified cell type, acute	HEM	208
Leukemia: Myeloid sarcoma	HEM	205.3 205.30 205.31 205.32
Leukemias: erythremic myelosis	HEM	207.0 207.00 207.01 207.10 207.11
Leukemias: lymphoid leukemia	HEM	204.20 204.21 204.22 204.80 204.81 204.9 204.90 204.91
Leukemias: Other codes	HEM	208.00 208.01 208.1 208.10 208.11 208.12 208.20 208.21 208.22 208.80 208.81 208.82 208.9 208.90 208.91 208.92 V10.60 V10.61 V10.62 V10.63 V10.69
Leukemias: remission/relapse	HEM	207.80 207.81 207.82
Leukemic reticuloendotheliosis	HEM	202.4 202.40 202.41 202.42 202.43 202.47 202.48
Lymphoid leukemia, acute	HEM	204.0 204.00 204.01 204.02
Lymphoid leukemia, chronic	HEM	204.1 204.10 204.11 204.12
Lymphosarcoma	HEM	200.1
Megakaryocytic leukemia	HEM	207.2 207.20 207.21
Monocytic leukemia	HEM	206. 206.0 206.00 206.01 206.02 206.1 206.10 206.11 206.12 206.20 206.21 206.80 206.81 206.90 206.91
Multiple myeloma	HEM	203.0 203.00 203.01 203.02 203.80 203.81 203.82
Mycosis fungoides	HEM	202.1 202.10 202.11 202.12 202.13 202.14 202.15 202.16 202.17 202.18
Myeloid leukemia, acute Myeloid leukemia, acute	HEM	205.0 205.00 205.01 205.02 205.1 205.10 205.11 205.12 205.20 205.21 205.22
Neoplasm of uncertain behavior of histiocytic and mast cells	HEM	238.5
Neoplasms	HEM	V10.7
Non-Hodgkins lymphoma	HEM	nhl.1
Non-Hodgkins lymphoma: lymphosarcoma and reticulosarcoma	HEM	200.80 200.81 200.82 200.83 200.84 200.85 200.86 200.88
Non-Hodgkins lymphoma:Anaplastic lymph xtrndl	HEM	200.60 200.61 200.62 200.63 200.64 200.65 200.66 200.68
Non-Hodgkins lymphoma:Large cell lymph	HEM	200.70 200.71 200.72 200.73 200.74 200.75 200.76 200.78
Non-Hodgkins lymphoma:Lymphosarcoma	HEM	200.10 200.11 200.12 200.13 200.14 200.15 200.16 200.17 200.18
Non-Hodgkins lymphoma:Mantle cell	HEM	200.4 200.40 200.41 200.42 200.43 200.44 200.45 200.46 200.47 200.48
Non-Hodgkins lymphoma:Margnl zone lym	HEM	200.30 200.31 200.32 200.33 200.34 200.35 200.37 200.38
Non-Hodgkins lymphoma:Nodular lymphoma	HEM	202.00 202.01 202.02 202.03 202.04 202.05 202.06 202.07 202.08
Non-Hodgkins lymphoma:Other malignant lymphomas	HEM	202.80 202.81 202.82 202.83 202.84 202.85 202.86 202.87 202.88
Non-Hodgkins lymphoma:Primary CNS	HEM	200.50 200.51 200.52 200.56 200.58
Non-Hodgkins lymphoma:Reticulosarcoma	HEM	200.00 200.01 200.02 200.03 200.04 200.05 200.06 200.07 200.08
Other and unspecified malignant neoplasms of lymphoid and histiocytic	HEM	202.90 202.91 202.92 202.93 202.94 202.95 202.96 202.98 V10.71
Other myeloid leukemia	HEM	205.80 205.81 205.82 205.9 205.90 205.91
Other named variants of lymphosarcoma and reticulosarcoma	HEM	200.8
Periph T cell lym xtrndl	HEM	202.70 202.71 202.72 202.74 202.75 202.77 202.78
Personal history of malignant neoplasm of other sites	HEM	V10.8
Plasma cell leukemia	HEM	203.1 203.10 203.11 203.12
Sezary's disease	HEM	202.2 202.20 202.21 202.22 202.23 202.24 202.25 202.28
Neoplasm of unspecified nature of digestive system	MET	239
Other secondary malignancy	MET	197.6 789.51
Other secondary malignancy	MET	198.2 198.4 198.6
Other secondary malignancy-GI	MET	197.4 197.5 197.8 198.
Other secondary malignancy-GU	MET	198.1 198.82
Other secondary malignancyrepiratory	MET	197.3 511.81
Sec neuroendo tu-periton	MET	209.74
Secondary malignancy of bone	MET	198.5 209.73
Secondary malignancy of liver	MET	197.7 209.72
Secondary malignancy of lymph nodes	MET	196. 196.0 196.1 196.2 196.3 196.5 196.6 196.8 209.71
Secondary malignant neoplasm of adrenal gland	MET	198.7
Secondary malignant neoplasm of brain and spinal cord	MET	198.3
Secondary malignant neoplasm of breast	MET	198.81
Secondary malignant neoplasm of kidney	MET	198
Secondary malignant neoplasm of lung	MET	197
Secondary malignant neoplasm of mediastinum	MET	197.1
Secondary malignant neoplasm of other specified sites	MET	198.89
Secondary malignant neoplasm of pleura	MET	197.2
Basal cell carcinoma	SKN	173.11 173.21 173.31 173.41 173.51 173.61 173.71 173.81 173.91
Melanomas of skin	SKN	172. 172.0 172.1 172.2 172.3 172.4 172.5 172.6 172.7 172.8 172.9 V10.82
sqamous cell carcinoma	SKN	173.12 173.22 173.32 173.42 173.52 173.62 173.72 173.82 173.92

## Sheet: Supplemental Table 6
Gene	GOCode	Ontology
A1CF	GO:0010608	posttranscriptional regulation of gene expression
A1CF	GO:0031647	regulation of protein stability
A1CF	GO:0006397	mRNA processing
A1CF	GO:0006396	RNA processing
A1CF	GO:0050821	protein stabilization
A1CF	GO:0016071	mRNA metabolic process
ABCB8	GO:0055085	transmembrane transport
ABCC12	GO:0055085	transmembrane transport
ABCC2	GO:0055085	transmembrane transport
ABCG5	GO:0042592	homeostatic process
ABCG5	GO:0055088	lipid homeostasis
ABCG5	GO:0015918	sterol transport
ABCG5	GO:0032374	regulation of cholesterol transport
ABCG5	GO:0032368	regulation of lipid transport
ABCG5	GO:0032372	negative regulation of sterol transport
ABCG5	GO:0006869	lipid transport
ABCG5	GO:0050892	intestinal absorption
ABCG5	GO:0042632	cholesterol homeostasis
ABCG5	GO:0044241	lipid digestion
ABCG5	GO:0044058	regulation of digestive system process
ABCG5	GO:0044057	regulation of system process
ABCG5	GO:0055092	sterol homeostasis
ABCG5	GO:0031667	response to nutrient levels
ABCG5	GO:0032375	negative regulation of cholesterol transport
ABCG5	GO:0009314	response to radiation
ABCG5	GO:0007586	digestion
ABCG5	GO:0010212	response to ionizing radiation
ABCG5	GO:0007588	excretion
ABCG5	GO:0042493	response to drug
ABCG5	GO:0051051	negative regulation of transport
ABCG5	GO:0051241	negative regulation of multicellular organismal process
ABCG5	GO:0007584	response to nutrient
ABCG5	GO:0033344	cholesterol efflux
ABCG5	GO:0010949	negative regulation of intestinal phytosterol absorption
ABCG5	GO:0045796	negative regulation of intestinal cholesterol absorption
ABCG5	GO:0009991	response to extracellular stimulus
ABCG5	GO:0060457	negative regulation of digestive system process
ABCG5	GO:0048878	chemical homeostasis
ABCG5	GO:0022600	digestive system process
ABCG5	GO:0032371	regulation of sterol transport
ABCG5	GO:0030299	intestinal cholesterol absorption
ABCG5	GO:0010876	lipid localization
ABCG5	GO:0030300	regulation of intestinal cholesterol absorption
ABCG5	GO:0030301	cholesterol transport
ABCG5	GO:0009628	response to abiotic stimulus
ABCG5	GO:0046903	secretion
ABCG5	GO:0032369	negative regulation of lipid transport
ACAA1	GO:0016054	organic acid catabolic process
ACAA1	GO:0006635	fatty acid beta-oxidation
ACAA1	GO:0006631	fatty acid metabolic process
ACAA1	GO:0033540	fatty acid beta-oxidation using acyl-CoA oxidase
ACAA1	GO:0044242	cellular lipid catabolic process
ACAA1	GO:0030258	lipid modification
ACAA1	GO:0009062	fatty acid catabolic process
ACAA1	GO:0019395	fatty acid oxidation
ACAA1	GO:0046395	carboxylic acid catabolic process
ACAA1	GO:0006091	generation of precursor metabolites and energy
ACAA1	GO:0016042	lipid catabolic process
ACAA1	GO:0034440	lipid oxidation
ACACB	GO:0010565	regulation of cellular ketone metabolic process
ACACB	GO:0008610	lipid biosynthetic process
ACACB	GO:0006633	fatty acid biosynthetic process
ACACB	GO:0006631	fatty acid metabolic process
ACACB	GO:0046394	carboxylic acid biosynthetic process
ACACB	GO:0019216	regulation of lipid metabolic process
ACACB	GO:0016053	organic acid biosynthetic process
ACACB	GO:0046320	regulation of fatty acid oxidation
ACACB	GO:0019217	regulation of fatty acid metabolic process
ADAM22	GO:0022610	biological adhesion
ADAM22	GO:0007229	integrin-mediated signaling pathway
ADAM22	GO:0007162	negative regulation of cell adhesion
ADAM22	GO:0007166	cell surface receptor linked signal transduction
ADAM22	GO:0030155	regulation of cell adhesion
ADAM22	GO:0007155	cell adhesion
ADAM22	GO:0006508	proteolysis
ADAMDEC1	GO:0007229	integrin-mediated signaling pathway
ADAMDEC1	GO:0030155	regulation of cell adhesion
ADAMDEC1	GO:0007162	negative regulation of cell adhesion
ADAMDEC1	GO:0007166	cell surface receptor linked signal transduction
ADAMDEC1	GO:0006508	proteolysis
ADAMTS16	GO:0006508	proteolysis
AGL	GO:0044264	cellular polysaccharide metabolic process
AGL	GO:0033692	cellular polysaccharide biosynthetic process
AGL	GO:0044042	glucan metabolic process
AGL	GO:0015980	energy derivation by oxidation of organic compounds
AGL	GO:0006091	generation of precursor metabolites and energy
AGL	GO:0005978	glycogen biosynthetic process
AGL	GO:0006073	cellular glucan metabolic process
AGL	GO:0000271	polysaccharide biosynthetic process
AGL	GO:0034637	cellular carbohydrate biosynthetic process
AGL	GO:0005996	monosaccharide metabolic process
AGL	GO:0005976	polysaccharide metabolic process
AGL	GO:0006006	glucose metabolic process
AGL	GO:0019318	hexose metabolic process
AGL	GO:0016051	carbohydrate biosynthetic process
AGL	GO:0006112	energy reserve metabolic process
AGL	GO:0009250	glucan biosynthetic process
AGL	GO:0005977	glycogen metabolic process
AHNAK2	GO:0030216	keratinocyte differentiation
AHNAK2	GO:0060429	epithelium development
AHNAK2	GO:0030855	epithelial cell differentiation
AHNAK2	GO:0007398	ectoderm development
AHNAK2	GO:0031424	keratinization
AHNAK2	GO:0009913	epidermal cell differentiation
AHNAK2	GO:0008544	epidermis development
AHR	GO:0045898	regulation of transcriptional preinitiation complex assembly
AHR	GO:0008219	cell death
AHR	GO:0044087	regulation of cellular component biogenesis
AHR	GO:0032774	RNA biosynthetic process
AHR	GO:0010604	positive regulation of macromolecule metabolic process
AHR	GO:0016265	death
AHR	GO:0009891	positive regulation of biosynthetic process
AHR	GO:0006915	apoptosis
AHR	GO:0010557	positive regulation of macromolecule biosynthetic process
AHR	GO:0006351	transcription, DNA-dependent
AHR	GO:0010628	positive regulation of gene expression
AHR	GO:0006350	transcription
AHR	GO:0006355	regulation of transcription, DNA-dependent
AHR	GO:0012501	programmed cell death
AHR	GO:0006357	regulation of transcription from RNA polymerase II promoter
AHR	GO:0006366	transcription from RNA polymerase II promoter
AHR	GO:0009410	response to xenobiotic stimulus
AHR	GO:0045893	positive regulation of transcription, DNA-dependent
AHR	GO:0043254	regulation of protein complex assembly
AHR	GO:0045899	positive regulation of transcriptional preinitiation complex assembly
AHR	GO:0045449	regulation of transcription
AHR	GO:0031328	positive regulation of cellular biosynthetic process
AHR	GO:0045935	positive regulation of nucleobase, nucleoside, nucleotide and nucleic acid metabolic process
AHR	GO:0007049	cell cycle
AHR	GO:0045941	positive regulation of transcription
AHR	GO:0051173	positive regulation of nitrogen compound metabolic process
AHR	GO:0051254	positive regulation of RNA metabolic process
AHR	GO:0051130	positive regulation of cellular component organization
AHR	GO:0045944	positive regulation of transcription from RNA polymerase II promoter
AHR	GO:0051252	regulation of RNA metabolic process
AHR	GO:0060260	regulation of transcription initiation from RNA polymerase II promoter
AKAP10	GO:0008104	protein localization
AKAP2	GO:0022604	regulation of cell morphogenesis
AKAP2	GO:0008360	regulation of cell shape
ALDH16A1	GO:0055114	oxidation reduction
ALMS1	GO:0050877	neurological system process
ALMS1	GO:0060271	cilium morphogenesis
ALMS1	GO:0048610	reproductive cellular process
ALMS1	GO:0050954	sensory perception of mechanical stimulus
ALMS1	GO:0055092	sterol homeostasis
ALMS1	GO:0050673	epithelial cell proliferation
ALMS1	GO:0048878	chemical homeostasis
ALMS1	GO:0046548	retinal rod cell development
ALMS1	GO:0048232	male gamete generation
ALMS1	GO:0048589	developmental growth
ALMS1	GO:0046530	photoreceptor cell differentiation
ALMS1	GO:0032990	cell part morphogenesis
ALMS1	GO:0033500	carbohydrate homeostasis
ALMS1	GO:0042632	cholesterol homeostasis
ALMS1	GO:0042593	glucose homeostasis
ALMS1	GO:0048666	neuron development
ALMS1	GO:0030182	neuron differentiation
ALMS1	GO:0040007	growth
ALMS1	GO:0032989	cellular component morphogenesis
ALMS1	GO:0042592	homeostatic process
ALMS1	GO:0042461	photoreceptor cell development
ALMS1	GO:0042384	cilium assembly
ALMS1	GO:0032504	multicellular organism reproduction
ALMS1	GO:0048609	reproductive process in a multicellular organism
ALMS1	GO:0019932	2nd msgr signal
ALMS1	GO:0030031	cell projection assembly
ALMS1	GO:0048515	spermatid differentiation
ALMS1	GO:0048592	eye morphogenesis
ALMS1	GO:0018904	organic ether metabolic process
ALMS1	GO:0012501	programmed cell death
ALMS1	GO:0055088	lipid homeostasis
ALMS1	GO:0048858	cell projection morphogenesis
ALMS1	GO:0042462	eye photoreceptor cell development
ALMS1	GO:0030030	cell projection organization
ALMS1	GO:0050953	sensory perception of light stimulus
ALMS1	GO:0008219	cell death
ALMS1	GO:0007605	sensory perception of sound
ALMS1	GO:0001654	eye development
ALMS1	GO:0007600	sensory perception
ALMS1	GO:0019722	calcium-mediated signaling
ALMS1	GO:0007242	intracellular signaling cascade
ALMS1	GO:0001754	eye photoreceptor cell differentiation
ALMS1	GO:0046486	glycerolipid metabolic process
ALMS1	GO:0007281	germ cell development
ALMS1	GO:0003006	reproductive developmental process
ALMS1	GO:0006641	triglyceride metabolic process
ALMS1	GO:0000902	cell morphogenesis
ALMS1	GO:0007601	visual perception
ALMS1	GO:0007283	spermatogenesis
ALMS1	GO:0007276	gamete generation
ALMS1	GO:0006639	acylglycerol metabolic process
ALMS1	GO:0007423	sensory organ development
ALMS1	GO:0006662	glycerol ether metabolic process
ALMS1	GO:0045598	regulation of fat cell differentiation
ALMS1	GO:0008283	cell proliferation
ALMS1	GO:0019953	sexual reproduction
ALMS1	GO:0050890	cognition
ALMS1	GO:0007286	spermatid development
ALMS1	GO:0006915	apoptosis
ALMS1	GO:0016265	death
ALMS1	GO:0006638	neutral lipid metabolic process
ALOX5	GO:0043450	alkene biosynthetic process
ALOX5	GO:0006954	inflammatory response
ALOX5	GO:0046394	carboxylic acid biosynthetic process
ALOX5	GO:0055114	oxidation reduction
ALOX5	GO:0031667	response to nutrient levels
ALOX5	GO:0006636	unsaturated fatty acid biosynthetic process
ALOX5	GO:0007584	response to nutrient
ALOX5	GO:0009991	response to extracellular stimulus
ALOX5	GO:0043449	cellular alkene metabolic process
ALOX5	GO:0006690	icosanoid metabolic process
ALOX5	GO:0009611	wound response
ALOX5	GO:0006633	fatty acid biosynthetic process
ALOX5	GO:0019370	leukotriene biosynthetic process
ALOX5	GO:0016053	organic acid biosynthetic process
ALOX5	GO:0006631	fatty acid metabolic process
ALOX5	GO:0044057	regulation of system process
ALOX5	GO:0033559	unsaturated fatty acid metabolic process
ALOX5	GO:0046456	icosanoid biosynthetic process
ALOX5	GO:0019229	regulation of vasoconstriction
ALOX5	GO:0006691	leukotriene metabolic process
ALOX5	GO:0000038	very-long-chain fatty acid metabolic process
ALOX5	GO:0006952	defense response
ALOX5	GO:0008610	lipid biosynthetic process
ALOX5	GO:0045907	positive regulation of vasoconstriction
ALOX5	GO:0051240	positive regulation of multicellular organismal process
APOL1	GO:0006955	immune response
APOL1	GO:0016125	sterol metabolic process
APOL1	GO:0042157	lipoprotein metabolic process
APOL1	GO:0031640	killing of cells of another organism
APOL1	GO:0008219	cell death
APOL1	GO:0019835	cytolysis
APOL1	GO:0008203	cholesterol metabolic process
APOL1	GO:0015698	inorganic anion transport
APOL1	GO:0008202	steroid metabolic process
APOL1	GO:0045087	innate immune response
APOL1	GO:0006869	lipid transport
APOL1	GO:0006821	chloride transport
APOL1	GO:0006820	anion transport
APOL1	GO:0006811	ion transport
APOL1	GO:0010876	lipid localization
APOL1	GO:0016265	death
APOL1	GO:0006952	defense response
APOL1	GO:0001906	cell killing
AQPEP	GO:0006508	proteolysis
ASAP3	GO:0032312	regulation of ARF GTPase activity
ASAP3	GO:0032318	regulation of Ras GTPase activity
ASAP3	GO:0043087	regulation of GTPase activity
ASAP3	GO:0046578	regulation of Ras protein signal transduction
ASAP3	GO:0051336	regulation of hydrolase activity
ASAP3	GO:0032012	regulation of ARF protein signal transduction
ASAP3	GO:0051056	regulation of small GTPase mediated signal transduction
ASCC2	GO:0045449	regulation of transcription
ASCC2	GO:0006350	transcription
ASZ1	GO:0001764	neuron migration
ASZ1	GO:0048545	response to steroid hormone stimulus
ASZ1	GO:0000226	microtubule cytoskeleton organization
ASZ1	GO:0006821	chloride transport
ASZ1	GO:0001936	regulation of endothelial cell proliferation
ASZ1	GO:0048732	gland development
ASZ1	GO:0048609	reproductive process in a multicellular organism
ASZ1	GO:0070507	regulation of microtubule cytoskeleton organization
ASZ1	GO:0070271	protein complex biogenesis
ASZ1	GO:0051674	localization of cell
ASZ1	GO:0051495	positive regulation of cytoskeleton organization
ASZ1	GO:0070633	transepithelial transport
ASZ1	GO:0065003	macromolecular complex assembly
ASZ1	GO:0051130	positive regulation of cellular component organization
ASZ1	GO:0050877	neurological system process
ASZ1	GO:0044087	regulation of cellular component biogenesis
ASZ1	GO:0048870	cell motility
ASZ1	GO:0046777	protein amino acid autophosphorylation
ASZ1	GO:0050880	regulation of blood vessel size
ASZ1	GO:0043623	cellular protein complex assembly
ASZ1	GO:0032504	multicellular organism reproduction
ASZ1	GO:0035150	regulation of tube size
ASZ1	GO:0042311	vasodilation
ASZ1	GO:0042493	response to drug
ASZ1	GO:0043434	response to peptide hormone stimulus
ASZ1	GO:0042127	regulation of cell proliferation
ASZ1	GO:0046785	microtubule polymerization
ASZ1	GO:0043627	response to estrogen stimulus
ASZ1	GO:0033043	regulation of organelle organization
ASZ1	GO:0031334	positive regulation of protein complex assembly
ASZ1	GO:0031113	regulation of microtubule polymerization
ASZ1	GO:0032273	positive regulation of protein polymerization
ASZ1	GO:0031116	positive regulation of microtubule polymerization
ASZ1	GO:0031109	microtubule polymerization or depolymerization
ASZ1	GO:0031112	positive regulation of microtubule polymerization or depolymerization
ASZ1	GO:0031110	regulation of microtubule polymerization or depolymerization
ASZ1	GO:0043254	regulation of protein complex assembly
ASZ1	GO:0032886	regulation of microtubule-based process
ASZ1	GO:0030323	respiratory tube development
ASZ1	GO:0043933	macromolecular complex subunit organization
ASZ1	GO:0034621	cellular macromolecular complex subunit organization
ASZ1	GO:0034622	cellular macromolecular complex assembly
ASZ1	GO:0035295	tube development
ASZ1	GO:0010033	response to organic substance
ASZ1	GO:0030317	sperm motility
ASZ1	GO:0019226	transmission of nerve impulse
ASZ1	GO:0010638	positive regulation of organelle organization
ASZ1	GO:0007267	cell-cell signaling
ASZ1	GO:0016477	cell migration
ASZ1	GO:0032271	regulation of protein polymerization
ASZ1	GO:0030321	transepithelial chloride transport
ASZ1	GO:0006796	phosphate metabolic process
ASZ1	GO:0016310	phosphorylation
ASZ1	GO:0009719	response to endogenous stimulus
ASZ1	GO:0015698	inorganic anion transport
ASZ1	GO:0051258	protein polymerization
ASZ1	GO:0007595	lactation
ASZ1	GO:0006820	anion transport
ASZ1	GO:0008015	blood circulation
ASZ1	GO:0008285	negative regulation of cell proliferation
ASZ1	GO:0007268	synaptic transmission
ASZ1	GO:0006928	cell motion
ASZ1	GO:0060541	respiratory system development
ASZ1	GO:0051493	regulation of cytoskeleton organization
ASZ1	GO:0003013	circulatory system process
ASZ1	GO:0030879	mammary gland development
ASZ1	GO:0006793	phosphorus metabolic process
ASZ1	GO:0006461	protein complex assembly
ASZ1	GO:0007017	microtubule-based process
ASZ1	GO:0006468	protein amino acid phosphorylation
ASZ1	GO:0030324	lung development
ASZ1	GO:0006811	ion transport
ASZ1	GO:0007010	cytoskeleton organization
ASZ1	GO:0003018	vascular process in circulatory system
ASZ1	GO:0009725	response to hormone stimulus
ASZ1	GO:0001937	negative regulation of endothelial cell proliferation
ATP10A	GO:0046034	ATP metabolic process
ATP10A	GO:0009260	ribonucleotide biosynthetic process
ATP10A	GO:0009201	ribonucleoside triphosphate biosynthetic process
ATP10A	GO:0009141	nucleoside triphosphate metabolic process
ATP10A	GO:0034404	nucleobase, nucleoside and nucleotide biosynthetic process
ATP10A	GO:0006164	purine nucleotide biosynthetic process
ATP10A	GO:0010876	lipid localization
ATP10A	GO:0009206	purine ribonucleoside triphosphate biosynthetic process
ATP10A	GO:0022604	regulation of cell morphogenesis
ATP10A	GO:0034654	nucleobase, nucleoside, nucleotide and nucleic acid biosynthetic process
ATP10A	GO:0044271	nitrogen compound biosynthetic process
ATP10A	GO:0009150	purine ribonucleotide metabolic process
ATP10A	GO:0009205	purine ribonucleoside triphosphate metabolic process
ATP10A	GO:0009165	nucleotide biosynthetic process
ATP10A	GO:0009145	purine nucleoside triphosphate biosynthetic process
ATP10A	GO:0009144	purine nucleoside triphosphate metabolic process
ATP10A	GO:0009152	purine ribonucleotide biosynthetic process
ATP10A	GO:0009142	nucleoside triphosphate biosynthetic process
ATP10A	GO:0006869	lipid transport
ATP10A	GO:0006754	ATP biosynthetic process
ATP10A	GO:0015914	phospholipid transport
ATP10A	GO:0009199	ribonucleoside triphosphate metabolic process
ATP10A	GO:0008360	regulation of cell shape
ATP10A	GO:0006163	purine nucleotide metabolic process
ATP10A	GO:0009259	ribonucleotide metabolic process
ATP10D	GO:0009201	ribonucleoside triphosphate biosynthetic process
ATP10D	GO:0009165	nucleotide biosynthetic process
ATP10D	GO:0046034	ATP metabolic process
ATP10D	GO:0034654	nucleobase, nucleoside, nucleotide and nucleic acid biosynthetic process
ATP10D	GO:0034404	nucleobase, nucleoside and nucleotide biosynthetic process
ATP10D	GO:0010876	lipid localization
ATP10D	GO:0009260	ribonucleotide biosynthetic process
ATP10D	GO:0009206	purine ribonucleoside triphosphate biosynthetic process
ATP10D	GO:0009205	purine ribonucleoside triphosphate metabolic process
ATP10D	GO:0009199	ribonucleoside triphosphate metabolic process
ATP10D	GO:0009259	ribonucleotide metabolic process
ATP10D	GO:0015914	phospholipid transport
ATP10D	GO:0044271	nitrogen compound biosynthetic process
ATP10D	GO:0009152	purine ribonucleotide biosynthetic process
ATP10D	GO:0009144	purine nucleoside triphosphate metabolic process
ATP10D	GO:0006869	lipid transport
ATP10D	GO:0006754	ATP biosynthetic process
ATP10D	GO:0006164	purine nucleotide biosynthetic process
ATP10D	GO:0006163	purine nucleotide metabolic process
ATP10D	GO:0006811	ion transport
ATP10D	GO:0006812	cation transport
ATP10D	GO:0009142	nucleoside triphosphate biosynthetic process
ATP10D	GO:0009141	nucleoside triphosphate metabolic process
ATP10D	GO:0009145	purine nucleoside triphosphate biosynthetic process
ATP10D	GO:0009150	purine ribonucleotide metabolic process
BBS2	GO:0060295	regulation of cilium movement involved in ciliary motility
BBS2	GO:0003006	reproductive developmental process
BBS2	GO:0035082	axoneme assembly
BBS2	GO:0060296	regulation of cilium beat frequency involved in ciliary motility
BBS2	GO:0070727	cellular macromolecule localization
BBS2	GO:0060632	regulation of microtubule-based movement
BBS2	GO:0051904	pigment granule transport
BBS2	GO:0051656	establishment of organelle localization
BBS2	GO:0051905	establishment of pigment granule localization
BBS2	GO:0021987	cerebral cortex development
BBS2	GO:0051270	regulation of cell motion
BBS2	GO:0040008	regulation of growth
BBS2	GO:0051640	organelle localization
BBS2	GO:0050877	neurological system process
BBS2	GO:0050953	sensory perception of light stimulus
BBS2	GO:0048858	cell projection morphogenesis
BBS2	GO:0048609	reproductive process in a multicellular organism
BBS2	GO:0048232	male gamete generation
BBS2	GO:0060271	cilium morphogenesis
BBS2	GO:0040012	regulation of locomotion
BBS2	GO:0045444	fat cell differentiation
BBS2	GO:0040014	regulation of multicellular organism growth
BBS2	GO:0043064	flagellum organization
BBS2	GO:0043473	pigmentation
BBS2	GO:0048854	brain morphogenesis
BBS2	GO:0050890	cognition
BBS2	GO:0051648	vesicle localization
BBS2	GO:0051875	pigment granule localization
BBS2	GO:0030534	adult behavior
BBS2	GO:0033059	cellular pigmentation
BBS2	GO:0033365	protein localization in organelle
BBS2	GO:0045926	negative regulation of growth
BBS2	GO:0034613	cellular protein localization
BBS2	GO:0035084	flagellar axoneme assembly
BBS2	GO:0032504	multicellular organism reproduction
BBS2	GO:0032402	melanosome transport
BBS2	GO:0030031	cell projection assembly
BBS2	GO:0040015	negative regulation of multicellular organism growth
BBS2	GO:0045494	photoreceptor cell maintenance
BBS2	GO:0043954	cellular component maintenance
BBS2	GO:0048610	reproductive cellular process
BBS2	GO:0048515	spermatid differentiation
BBS2	GO:0032990	cell part morphogenesis
BBS2	GO:0032400	melanosome localization
BBS2	GO:0021766	hippocampus development
BBS2	GO:0032886	regulation of microtubule-based process
BBS2	GO:0032989	cellular component morphogenesis
BBS2	GO:0021761	limbic system development
BBS2	GO:0030900	forebrain development
BBS2	GO:0030030	cell projection organization
BBS2	GO:0021543	pallium development
BBS2	GO:0051650	establishment of vesicle localization
BBS2	GO:0021544	subpallium development
BBS2	GO:0007017	microtubule-based process
BBS2	GO:0051241	negative regulation of multicellular organismal process
BBS2	GO:0007281	germ cell development
BBS2	GO:0008104	protein localization
BBS2	GO:0007601	visual perception
BBS2	GO:0009296	flagellum assembly
BBS2	GO:0007600	sensory perception
BBS2	GO:0007276	gamete generation
BBS2	GO:0021756	striatum development
BBS2	GO:0010927	cellular component assembly involved in morphogenesis
BBS2	GO:0007610	behavior
BBS2	GO:0007283	spermatogenesis
BBS2	GO:0007286	spermatid development
BBS2	GO:0007288	sperm axoneme assembly
BBS2	GO:0019953	sexual reproduction
BBS2	GO:0001578	microtubule bundle formation
BBS2	GO:0007010	cytoskeleton organization
BBS2	GO:0000902	cell morphogenesis
BBS2	GO:0000226	microtubule cytoskeleton organization
BBS2	GO:0032401	establishment of melanosome localization
BBS2	GO:0021537	telencephalon development
BCAR1	GO:0043434	response to peptide hormone stimulus
BCAR1	GO:0051674	localization of cell
BCAR1	GO:0050851	antigen receptor-mediated signaling pathway
BCAR1	GO:0050778	positive regulation of immune response
BCAR1	GO:0051301	cell division
BCAR1	GO:0051270	regulation of cell motion
BCAR1	GO:0048870	cell motility
BCAR1	GO:0048008	platelet-derived growth factor receptor signaling pathway
BCAR1	GO:0043067	regulation of programmed cell death
BCAR1	GO:0042981	regulation of apoptosis
BCAR1	GO:0050852	T cell receptor signaling pathway
BCAR1	GO:0040012	regulation of locomotion
BCAR1	GO:0048584	positive regulation of response to stimulus
BCAR1	GO:0007229	integrin-mediated signaling pathway
BCAR1	GO:0032869	cellular response to insulin stimulus
BCAR1	GO:0032870	cellular response to hormone stimulus
BCAR1	GO:0030334	regulation of cell migration
BCAR1	GO:0030335	positive regulation of cell migration
BCAR1	GO:0030029	actin filament-based process
BCAR1	GO:0016477	cell migration
BCAR1	GO:0040017	positive regulation of locomotion
BCAR1	GO:0050853	B cell receptor signaling pathway
BCAR1	GO:0030036	actin cytoskeleton organization
BCAR1	GO:0051272	positive regulation of cell motion
BCAR1	GO:0008286	insulin receptor signaling pathway
BCAR1	GO:0010941	regulation of cell death
BCAR1	GO:0048011	nerve growth factor receptor signaling pathway
BCAR1	GO:0009725	response to hormone stimulus
BCAR1	GO:0022610	biological adhesion
BCAR1	GO:0010033	response to organic substance
BCAR1	GO:0009719	response to endogenous stimulus
BCAR1	GO:0008283	cell proliferation
BCAR1	GO:0032868	response to insulin stimulus
BCAR1	GO:0007015	actin filament organization
BCAR1	GO:0007173	epidermal growth factor receptor signaling pathway
BCAR1	GO:0007167	enzyme linked receptor protein signaling pathway
BCAR1	GO:0007186	G-protein coupled receptor protein signaling pathway
BCAR1	GO:0007155	cell adhesion
BCAR1	GO:0007169	transmembrane receptor protein tyrosine kinase signaling pathway
BCAR1	GO:0007010	cytoskeleton organization
BCAR1	GO:0040008	regulation of growth
BCAR1	GO:0007166	cell surface receptor linked signal transduction
BCAR1	GO:0002429	immune response-activating cell surface receptor signaling pathway
BCAR1	GO:0001558	regulation of cell growth
BCAR1	GO:0002757	immune response-activating signal transduction
BCAR1	GO:0002253	activation of immune response
BCAR1	GO:0006928	cell motion
BCAR1	GO:0002764	immune response-regulating signal transduction
BCAR1	GO:0002768	immune response-regulating cell surface receptor signaling pathway
BCAR1	GO:0002684	positive regulation of immune system process
BLZF1	GO:0016192	vesicle-mediated transport
BLZF1	GO:0006355	regulation of transcription, DNA-dependent
BLZF1	GO:0006357	regulation of transcription from RNA polymerase II promoter
BLZF1	GO:0008104	protein localization
BLZF1	GO:0015031	protein transport
BLZF1	GO:0008283	cell proliferation
BLZF1	GO:0001558	regulation of cell growth
BLZF1	GO:0051252	regulation of RNA metabolic process
BLZF1	GO:0040008	regulation of growth
BLZF1	GO:0045449	regulation of transcription
BLZF1	GO:0045184	establishment of protein localization
BST1	GO:0006959	humoral immune response
BST1	GO:0006955	immune response
C2CD3	GO:0060271	cilium morphogenesis
C2CD3	GO:0060429	epithelium development
C2CD3	GO:0051604	protein maturation
C2CD3	GO:0048736	appendage development
C2CD3	GO:0043009	chordate embryonic development
C2CD3	GO:0060173	limb development
C2CD3	GO:0048729	tissue morphogenesis
C2CD3	GO:0048598	embryonic morphogenesis
C2CD3	GO:0042384	cilium assembly
C2CD3	GO:0042733	embryonic digit morphogenesis
C2CD3	GO:0035108	limb morphogenesis
C2CD3	GO:0001701	in utero embryonic development
C2CD3	GO:0035113	embryonic appendage morphogenesis
C2CD3	GO:0030326	embryonic limb morphogenesis
C2CD3	GO:0000902	cell morphogenesis
C2CD3	GO:0035239	tube morphogenesis
C2CD3	GO:0035295	tube development
C2CD3	GO:0001840	neural plate development
C2CD3	GO:0032990	cell part morphogenesis
C2CD3	GO:0030031	cell projection assembly
C2CD3	GO:0016331	morphogenesis of embryonic epithelium
C2CD3	GO:0021997	neural plate pattern formation
C2CD3	GO:0009798	axis specification
C2CD3	GO:0008589	regulation of smoothened signaling pathway
C2CD3	GO:0009880	embryonic pattern specification
C2CD3	GO:0001947	heart looping
C2CD3	GO:0002009	morphogenesis of an epithelium
C2CD3	GO:0048858	cell projection morphogenesis
C2CD3	GO:0007389	pattern specification process
C2CD3	GO:0007507	heart development
C2CD3	GO:0009792	embryonic development ending in birth or egg hatching
C2CD3	GO:0003007	heart morphogenesis
C2CD3	GO:0021915	neural tube development
C2CD3	GO:0030030	cell projection organization
C2CD3	GO:0030162	regulation of proteolysis
C2CD3	GO:0032989	cellular component morphogenesis
C2CD3	GO:0000578	embryonic axis specification
C2CD3	GO:0016485	protein processing
C2CD3	GO:0035107	appendage morphogenesis
C4BPA	GO:0016064	immunoglobulin mediated immune response
C4BPA	GO:0051605	protein maturation by peptide bond cleavage
C4BPA	GO:0045087	innate immune response
C4BPA	GO:0051604	protein maturation
C4BPA	GO:0019724	B cell mediated immunity
C4BPA	GO:0016485	protein processing
C4BPA	GO:0009611	wound response
C4BPA	GO:0006958	complement activation, classical pathway
C4BPA	GO:0002449	lymphocyte mediated immunity
C4BPA	GO:0002253	activation of immune response
C4BPA	GO:0050778	positive regulation of immune response
C4BPA	GO:0006954	inflammatory response
C4BPA	GO:0002684	positive regulation of immune system process
C4BPA	GO:0002541	activation of plasma proteins involved in acute inflammatory response
C4BPA	GO:0002526	acute inflammatory response
C4BPA	GO:0006952	defense response
C4BPA	GO:0002250	adaptive immune response
C4BPA	GO:0002455	humoral immune response mediated by circulating immunoglobulin
C4BPA	GO:0006959	humoral immune response
C4BPA	GO:0006956	complement activation
C4BPA	GO:0002252	immune effector process
C4BPA	GO:0006508	proteolysis
C4BPA	GO:0002460	adaptive immune response based on somatic recombination of immune receptors built from immunoglobulin superfamily domains
C4BPA	GO:0002443	leukocyte mediated immunity
C4BPA	GO:0006955	immune response
C4BPA	GO:0048584	positive regulation of response to stimulus
CA1	GO:0006730	one-carbon metabolic process
CA2	GO:0046852	positive regulation of bone remodeling
CA2	GO:0060429	epithelium development
CA2	GO:0051240	positive regulation of multicellular organismal process
CA2	GO:0048729	tissue morphogenesis
CA2	GO:0010043	response to zinc ion
CA2	GO:0046903	secretion
CA2	GO:0015669	gas transport
CA2	GO:0015670	carbon dioxide transport
CA2	GO:0045597	positive regulation of cell differentiation
CA2	GO:0045670	regulation of osteoclast differentiation
CA2	GO:0032849	positive regulation of cellular pH reduction
CA2	GO:0051094	positive regulation of developmental process
CA2	GO:0043627	response to estrogen stimulus
CA2	GO:0042475	odontogenesis of dentine-containing tooth
CA2	GO:0042476	odontogenesis
CA2	GO:0034105	positive regulation of tissue remodeling
CA2	GO:0045124	regulation of bone resorption
CA2	GO:0034103	regulation of tissue remodeling
CA2	GO:0045637	regulation of myeloid cell differentiation
CA2	GO:0045639	positive regulation of myeloid cell differentiation
CA2	GO:0032847	regulation of cellular pH reduction
CA2	GO:0032844	regulation of homeostatic process
CA2	GO:0032846	positive regulation of homeostatic process
CA2	GO:0046850	regulation of bone remodeling
CA2	GO:0045780	positive regulation of bone resorption
CA2	GO:0010038	response to metal ion
CA2	GO:0048545	response to steroid hormone stimulus
CA2	GO:0010035	response to inorganic substance
CA2	GO:0010033	response to organic substance
CA2	GO:0009628	response to abiotic stimulus
CA2	GO:0006730	one-carbon metabolic process
CA2	GO:0009719	response to endogenous stimulus
CA2	GO:0009268	response to pH
CA2	GO:0009725	response to hormone stimulus
CA2	GO:0045672	positive regulation of osteoclast differentiation
CA2	GO:0002763	positive regulation of myeloid leukocyte differentiation
CA2	GO:0002761	regulation of myeloid leukocyte differentiation
CA2	GO:0001822	kidney development
CA2	GO:0002009	morphogenesis of an epithelium
CA2	GO:0001655	urogenital system development
CASS4	GO:0022610	biological adhesion
CASS4	GO:0007155	cell adhesion
CCL27	GO:0042330	taxis
CCL27	GO:0007626	locomotory behavior
CCL27	GO:0007166	cell surface receptor linked signal transduction
CCL27	GO:0006935	chemotaxis
CCL27	GO:0006955	immune response
CCL27	GO:0007267	cell-cell signaling
CCL27	GO:0007610	behavior
CCL27	GO:0007186	G-protein coupled receptor protein signaling pathway
CCNH	GO:0070271	protein complex biogenesis
CCNH	GO:0065003	macromolecular complex assembly
CCNH	GO:0051254	positive regulation of RNA metabolic process
CCNH	GO:0051173	positive regulation of nitrogen compound metabolic process
CCNH	GO:0051252	regulation of RNA metabolic process
CCNH	GO:0045941	positive regulation of transcription
CCNH	GO:0045893	positive regulation of transcription, DNA-dependent
CCNH	GO:0044265	cellular macromolecule catabolic process
CCNH	GO:0045944	positive regulation of transcription from RNA polymerase II promoter
CCNH	GO:0043933	macromolecular complex subunit organization
CCNH	GO:0033554	cellular response to stress
CCNH	GO:0031328	positive regulation of cellular biosynthetic process
CCNH	GO:0006367	transcription initiation from RNA polymerase II promoter
CCNH	GO:0006974	response to DNA damage stimulus
CCNH	GO:0007049	cell cycle
CCNH	GO:0009891	positive regulation of biosynthetic process
CCNH	GO:0006461	protein complex assembly
CCNH	GO:0045449	regulation of transcription
CCNH	GO:0006368	RNA elongation from RNA polymerase II promoter
CCNH	GO:0045935	positive regulation of nucleobase, nucleoside, nucleotide and nucleic acid metabolic process
CCNH	GO:0010628	positive regulation of gene expression
CCNH	GO:0032774	RNA biosynthetic process
CCNH	GO:0006366	transcription from RNA polymerase II promoter
CCNH	GO:0009057	macromolecule catabolic process
CCNH	GO:0006357	regulation of transcription from RNA polymerase II promoter
CCNH	GO:0006350	transcription
CCNH	GO:0000718	nucleotide-excision repair, DNA damage removal
CCNH	GO:0010557	positive regulation of macromolecule biosynthetic process
CCNH	GO:0010604	positive regulation of macromolecule metabolic process
CCNH	GO:0006352	transcription initiation
CCNH	GO:0006289	nucleotide-excision repair
CCNH	GO:0006308	DNA catabolic process
CCNH	GO:0006281	DNA repair
CCNH	GO:0006259	DNA metabolic process
CCNH	GO:0006354	RNA elongation
CCNH	GO:0006351	transcription, DNA-dependent
CCNH	GO:0006355	regulation of transcription, DNA-dependent
CD180	GO:0006952	defense response
CD180	GO:0045087	innate immune response
CD180	GO:0006954	inflammatory response
CD180	GO:0006955	immune response
CD180	GO:0009611	wound response
CD36	GO:0046942	carboxylic acid transport
CD36	GO:0051094	positive regulation of developmental process
CD36	GO:0050878	reg body fluids
CD36	GO:0045597	positive regulation of cell differentiation
CD36	GO:0045785	positive regulation of cell adhesion
CD36	GO:0050817	coagulation
CD36	GO:0045184	establishment of protein localization
CD36	GO:0044265	cellular macromolecule catabolic process
CD36	GO:0043277	apoptotic cell clearance
CD36	GO:0042159	lipoprotein catabolic process
CD36	GO:0042157	lipoprotein metabolic process
CD36	GO:0042060	wound healing
CD36	GO:0030301	cholesterol transport
CD36	GO:0030155	regulation of cell adhesion
CD36	GO:0019935	cyclic-nucleotide-mediated signaling
CD36	GO:0022610	biological adhesion
CD36	GO:0019915	lipid storage
CD36	GO:0016192	vesicle-mediated transport
CD36	GO:0016044	membrane organization
CD36	GO:0015918	sterol transport
CD36	GO:0015909	long-chain fatty acid transport
CD36	GO:0015718	monocarboxylic acid transport
CD36	GO:0010884	positive regulation of lipid storage
CD36	GO:0010810	regulation of cell-substrate adhesion
CD36	GO:0015849	organic acid transport
CD36	GO:0010324	membrane invagination
CD36	GO:0009611	wound response
CD36	GO:0019932	2nd msgr signal
CD36	GO:0019934	cGMP-mediated signaling
CD36	GO:0007596	blood coagulation
CD36	GO:0007242	intracellular signaling cascade
CD36	GO:0006909	phagocytosis
CD36	GO:0034381	lipoprotein particle clearance
CD36	GO:0042953	lipoprotein transport
CD36	GO:0006897	endocytosis
CD36	GO:0006869	lipid transport
CD36	GO:0007263	nitric oxide mediated signal transduction
CD36	GO:0001952	regulation of cell-matrix adhesion
CD36	GO:0007599	hemostasis
CD36	GO:0008104	protein localization
CD36	GO:0010811	positive regulation of cell-substrate adhesion
CD36	GO:0009057	macromolecule catabolic process
CD36	GO:0010744	positive regulation of foam cell differentiation
CD36	GO:0010743	regulation of foam cell differentiation
CD36	GO:0007155	cell adhesion
CD36	GO:0015911	plasma membrane long-chain fatty acid transport
CD36	GO:0010876	lipid localization
CD36	GO:0010885	regulation of cholesterol storage
CD36	GO:0001954	positive regulation of cell-matrix adhesion
CD36	GO:0010883	regulation of lipid storage
CD36	GO:0010886	positive regulation of cholesterol storage
CD36	GO:0015908	fatty acid transport
CD36	GO:0015031	protein transport
CDH16	GO:0022610	biological adhesion
CDH16	GO:0016337	cell-cell adhesion
CDH16	GO:0007155	cell adhesion
CDH16	GO:0007156	homophilic cell adhesion
CDHR1	GO:0050953	sensory perception of light stimulus
CDHR1	GO:0050890	cognition
CDHR1	GO:0050877	neurological system process
CDHR1	GO:0045494	photoreceptor cell maintenance
CDHR1	GO:0043954	cellular component maintenance
CDHR1	GO:0022610	biological adhesion
CDHR1	GO:0016337	cell-cell adhesion
CDHR1	GO:0007601	visual perception
CDHR1	GO:0007600	sensory perception
CDHR1	GO:0007156	homophilic cell adhesion
CDHR1	GO:0007155	cell adhesion
CENPF	GO:0065003	macromolecular complex assembly
CENPF	GO:0070271	protein complex biogenesis
CENPF	GO:0065004	protein-DNA complex assembly
CENPF	GO:0051726	regulation of cell cycle
CENPF	GO:0051784	negative regulation of nuclear division
CENPF	GO:0051301	cell division
CENPF	GO:0051382	kinetochore assembly
CENPF	GO:0051303	establishment of chromosome localization
CENPF	GO:0051325	interphase
CENPF	GO:0030071	regulation of mitotic metaphase/anaphase transition
CENPF	GO:0051310	metaphase plate congression
CENPF	GO:0045934	negative regulation of nucleobase, nucleoside, nucleotide and nucleic acid metabolic process
CENPF	GO:0048634	regulation of muscle development
CENPF	GO:0048285	organelle fission
CENPF	GO:0045786	negative regulation of cell cycle
CENPF	GO:0045184	establishment of protein localization
CENPF	GO:0045839	negative regulation of mitosis
CENPF	GO:0043623	cellular protein complex assembly
CENPF	GO:0034622	cellular macromolecular complex assembly
CENPF	GO:0051129	negative regulation of cellular component organization
CENPF	GO:0033043	regulation of organelle organization
CENPF	GO:0031577	spindle checkpoint
CENPF	GO:0016481	negative regulation of transcription
CENPF	GO:0051172	negative regulation of nitrogen compound metabolic process
CENPF	GO:0015031	protein transport
CENPF	GO:0031327	negative regulation of cellular biosynthetic process
CENPF	GO:0034508	centromere complex assembly
CENPF	GO:0051319	G2 phase
CENPF	GO:0050000	chromosome localization
CENPF	GO:0042493	response to drug
CENPF	GO:0022403	cell cycle phase
CENPF	GO:0051783	regulation of nuclear division
CENPF	GO:0022402	cell cycle process
CENPF	GO:0045449	regulation of transcription
CENPF	GO:0043933	macromolecular complex subunit organization
CENPF	GO:0051329	interphase of mitotic cell cycle
CENPF	GO:0016202	regulation of striated muscle tissue development
CENPF	GO:0051383	kinetochore organization
CENPF	GO:0010948	negative regulation of cell cycle process
CENPF	GO:0010639	negative regulation of organelle organization
CENPF	GO:0034621	cellular macromolecular complex subunit organization
CENPF	GO:0045841	negative regulation of mitotic metaphase/anaphase transition
CENPF	GO:0051276	chromosome organization
CENPF	GO:0010629	negative regulation of gene expression
CENPF	GO:0010564	regulation of cell cycle process
CENPF	GO:0010558	negative regulation of macromolecule biosynthetic process
CENPF	GO:0010389	regulation of G2/M transition of mitotic cell cycle
CENPF	GO:0010605	negative regulation of macromolecule metabolic process
CENPF	GO:0007517	muscle organ development
CENPF	GO:0008104	protein localization
CENPF	GO:0007094	mitotic cell cycle spindle assembly checkpoint
CENPF	GO:0007093	mitotic cell cycle checkpoint
CENPF	GO:0007088	regulation of mitosis
CENPF	GO:0051640	organelle localization
CENPF	GO:0051656	establishment of organelle localization
CENPF	GO:0009890	negative regulation of biosynthetic process
CENPF	GO:0007059	chromosome segregation
CENPF	GO:0007049	cell cycle
CENPF	GO:0007067	mitosis
CENPF	GO:0007346	regulation of mitotic cell cycle
CENPF	GO:0006461	protein complex assembly
CENPF	GO:0000085	G2 phase of mitotic cell cycle
CENPF	GO:0006259	DNA metabolic process
CENPF	GO:0000280	nuclear division
CENPF	GO:0008283	cell proliferation
CENPF	GO:0000075	cell cycle checkpoint
CENPF	GO:0000278	mitotic cell cycle
CENPF	GO:0000087	M phase of mitotic cell cycle
CENPF	GO:0000279	M phase
CENPF	GO:0006260	DNA replication
CER1	GO:0051674	localization of cell
CER1	GO:0048870	cell motility
CER1	GO:0048598	embryonic morphogenesis
CER1	GO:0042127	regulation of cell proliferation
CER1	GO:0042074	cell migration involved in gastrulation
CER1	GO:0009798	axis specification
CER1	GO:0009952	anterior/posterior pattern formation
CER1	GO:0009948	anterior/posterior axis specification
CER1	GO:0009968	negative regulation of signal transduction
CER1	GO:0007369	gastrulation
CER1	GO:0007178	transmembrane receptor protein serine/threonine kinase signaling pathway
CER1	GO:0010648	negative regulation of cell communication
CER1	GO:0007166	cell surface receptor linked signal transduction
CER1	GO:0006928	cell motion
CER1	GO:0003002	regionalization
CER1	GO:0001667	ameboidal cell migration
CER1	GO:0030509	BMP signaling pathway
CER1	GO:0030514	negative regulation of BMP signaling pathway
CER1	GO:0008285	negative regulation of cell proliferation
CER1	GO:0030510	regulation of BMP signaling pathway
CER1	GO:0016477	cell migration
CER1	GO:0007167	enzyme linked receptor protein signaling pathway
CER1	GO:0007389	pattern specification process
CHAD	GO:0040008	regulation of growth
CHAD	GO:0022610	biological adhesion
CHAD	GO:0051216	cartilage development
CHAD	GO:0048705	skeletal system morphogenesis
CHAD	GO:0016337	cell-cell adhesion
CHAD	GO:0007155	cell adhesion
CHAD	GO:0001501	skeletal system development
CHAD	GO:0001502	cartilage condensation
CHAD	GO:0001558	regulation of cell growth
CHAF1A	GO:0033554	cellular response to stress
CHAF1A	GO:0070271	protein complex biogenesis
CHAF1A	GO:0006333	chromatin assembly or disassembly
CHAF1A	GO:0006335	DNA replication-dependent nucleosome assembly
CHAF1A	GO:0034728	nucleosome organization
CHAF1A	GO:0065003	macromolecular complex assembly
CHAF1A	GO:0043933	macromolecular complex subunit organization
CHAF1A	GO:0034723	DNA replication-dependent nucleosome organization
CHAF1A	GO:0034621	cellular macromolecular complex subunit organization
CHAF1A	GO:0051276	chromosome organization
CHAF1A	GO:0031497	chromatin assembly
CHAF1A	GO:0006260	DNA replication
CHAF1A	GO:0006325	chromatin organization
CHAF1A	GO:0045449	regulation of transcription
CHAF1A	GO:0006461	protein complex assembly
CHAF1A	GO:0065004	protein-DNA complex assembly
CHAF1A	GO:0006974	response to DNA damage stimulus
CHAF1A	GO:0006334	nucleosome assembly
CHAF1A	GO:0006350	transcription
CHAF1A	GO:0006323	DNA packaging
CHAF1A	GO:0034622	cellular macromolecular complex assembly
CHAF1A	GO:0006281	DNA repair
CHAF1A	GO:0006259	DNA metabolic process
CHAF1A	GO:0007049	cell cycle
CLGN	GO:0009566	fertilization
CLGN	GO:0019953	sexual reproduction
CLGN	GO:0006457	protein folding
CLGN	GO:0007338	single fertilization
CLPB	GO:0009266	response to temperature stimulus
CLPB	GO:0033554	cellular response to stress
CLPB	GO:0034605	cellular response to heat
CLPB	GO:0009628	response to abiotic stimulus
CLPB	GO:0009408	response to heat
COL28A1	GO:0007155	cell adhesion
COL28A1	GO:0022610	biological adhesion
CPT1B	GO:0044242	cellular lipid catabolic process
CPT1B	GO:0046942	carboxylic acid transport
CPT1B	GO:0051181	cofactor transport
CPT1B	GO:0051180	vitamin transport
CPT1B	GO:0046470	phosphatidylcholine metabolic process
CPT1B	GO:0046486	glycerolipid metabolic process
CPT1B	GO:0046395	carboxylic acid catabolic process
CPT1B	GO:0046474	glycerophospholipid biosynthetic process
CPT1B	GO:0055085	transmembrane transport
CPT1B	GO:0045017	glycerolipid biosynthetic process
CPT1B	GO:0042439	ethanolamine and derivative metabolic process
CPT1B	GO:0019637	organophosphate metabolic process
CPT1B	GO:0019395	fatty acid oxidation
CPT1B	GO:0032365	intracellular lipid transport
CPT1B	GO:0019217	regulation of fatty acid metabolic process
CPT1B	GO:0019216	regulation of lipid metabolic process
CPT1B	GO:0016042	lipid catabolic process
CPT1B	GO:0015909	long-chain fatty acid transport
CPT1B	GO:0015908	fatty acid transport
CPT1B	GO:0030258	lipid modification
CPT1B	GO:0015849	organic acid transport
CPT1B	GO:0015838	betaine transport
CPT1B	GO:0016054	organic acid catabolic process
CPT1B	GO:0015718	monocarboxylic acid transport
CPT1B	GO:0015697	quaternary ammonium group transport
CPT1B	GO:0010565	regulation of cellular ketone metabolic process
CPT1B	GO:0015695	organic cation transport
CPT1B	GO:0010876	lipid localization
CPT1B	GO:0008654	phospholipid biosynthetic process
CPT1B	GO:0034440	lipid oxidation
CPT1B	GO:0008610	lipid biosynthetic process
CPT1B	GO:0007517	muscle organ development
CPT1B	GO:0046320	regulation of fatty acid oxidation
CPT1B	GO:0006869	lipid transport
CPT1B	GO:0046907	intracellular transport
CPT1B	GO:0015837	amine transport
CPT1B	GO:0015879	carnitine transport
CPT1B	GO:0006865	amino acid transport
CPT1B	GO:0006853	carnitine shuttle
CPT1B	GO:0006811	ion transport
CPT1B	GO:0006635	fatty acid beta-oxidation
CPT1B	GO:0006575	cellular amino acid derivative metabolic process
CPT1B	GO:0009062	fatty acid catabolic process
CPT1B	GO:0006576	biogenic amine metabolic process
CPT1B	GO:0006631	fatty acid metabolic process
CPT1B	GO:0006644	phospholipid metabolic process
CPT1B	GO:0006650	glycerophospholipid metabolic process
CPT1B	GO:0006812	cation transport
CPT1B	GO:0006839	mitochondrial transport
CPT1B	GO:0006656	phosphatidylcholine biosynthetic process
CSF3R	GO:0022610	biological adhesion
CSF3R	GO:0006952	defense response
CSF3R	GO:0007155	cell adhesion
CTBP2	GO:0019079	viral genome replication
CTBP2	GO:0031327	negative regulation of cellular biosynthetic process
CTBP2	GO:0051253	negative regulation of RNA metabolic process
CTBP2	GO:0042127	regulation of cell proliferation
CTBP2	GO:0045444	fat cell differentiation
CTBP2	GO:0045892	negative regulation of transcription, DNA-dependent
CTBP2	GO:0045934	negative regulation of nucleobase, nucleoside, nucleotide and nucleic acid metabolic process
CTBP2	GO:0050872	white fat cell differentiation
CTBP2	GO:0045449	regulation of transcription
CTBP2	GO:0051172	negative regulation of nitrogen compound metabolic process
CTBP2	GO:0051252	regulation of RNA metabolic process
CTBP2	GO:0022415	viral reproductive process
CTBP2	GO:0019058	viral infectious cycle
CTBP2	GO:0016481	negative regulation of transcription
CTBP2	GO:0016032	viral reproduction
CTBP2	GO:0010629	negative regulation of gene expression
CTBP2	GO:0010558	negative regulation of macromolecule biosynthetic process
CTBP2	GO:0010605	negative regulation of macromolecule metabolic process
CTBP2	GO:0055114	oxidation reduction
CTBP2	GO:0009890	negative regulation of biosynthetic process
CTBP2	GO:0006355	regulation of transcription, DNA-dependent
CTBP2	GO:0008285	negative regulation of cell proliferation
CUL7	GO:0051603	proteolysis involved in cellular protein catabolic process
CUL7	GO:0048514	blood vessel morphogenesis
CUL7	GO:0044265	cellular macromolecule catabolic process
CUL7	GO:0043632	modification-dependent macromolecule catabolic process
CUL7	GO:0033043	regulation of organelle organization
CUL7	GO:0051783	regulation of nuclear division
CUL7	GO:0030163	protein catabolic process
CUL7	GO:0030071	regulation of mitotic metaphase/anaphase transition
CUL7	GO:0051726	regulation of cell cycle
CUL7	GO:0019941	modification-dependent protein catabolic process
CUL7	GO:0044257	cellular protein catabolic process
CUL7	GO:0009057	macromolecule catabolic process
CUL7	GO:0010564	regulation of cell cycle process
CUL7	GO:0007346	regulation of mitotic cell cycle
CUL7	GO:0007088	regulation of mitosis
CUL7	GO:0006511	ubiquitin-dependent protein catabolic process
CUL7	GO:0006508	proteolysis
CUL7	GO:0001944	vasculature development
CUL7	GO:0001570	vasculogenesis
CUL7	GO:0001568	blood vessel development
CXCL12	GO:0002690	positive regulation of leukocyte chemotaxis
CXCL12	GO:0030030	cell projection organization
CXCL12	GO:0030003	cellular cation homeostasis
CXCL12	GO:0007186	G-protein coupled receptor protein signaling pathway
CXCL12	GO:0009615	response to virus
CXCL12	GO:0019725	cellular homeostasis
CXCL12	GO:0008064	regulation of actin polymerization or depolymerization
CXCL12	GO:0007411	axon guidance
CXCL12	GO:0007626	locomotory behavior
CXCL12	GO:0007389	pattern specification process
CXCL12	GO:0007155	cell adhesion
CXCL12	GO:0007166	cell surface receptor linked signal transduction
CXCL12	GO:0006875	cellular metal ion homeostasis
CXCL12	GO:0007281	germ cell development
CXCL12	GO:0006935	chemotaxis
CXCL12	GO:0006955	immune response
CXCL12	GO:0008283	cell proliferation
CXCL12	GO:0006928	cell motion
CXCL12	GO:0007610	behavior
CXCL12	GO:0008045	motor axon guidance
CXCL12	GO:0006874	cellular calcium ion homeostasis
CXCL12	GO:0007276	gamete generation
CXCL12	GO:0007409	axonogenesis
CXCL12	GO:0006873	cellular ion homeostasis
CXCL12	GO:0003013	circulatory system process
CXCL12	GO:0008354	germ cell migration
CXCL12	GO:0003006	reproductive developmental process
CXCL12	GO:0016477	cell migration
CXCL12	GO:0019953	sexual reproduction
CXCL12	GO:0002687	positive regulation of leukocyte migration
CXCL12	GO:0002685	regulation of leukocyte migration
CXCL12	GO:0022610	biological adhesion
CXCL12	GO:0002688	regulation of leukocyte chemotaxis
CXCL12	GO:0001775	cell activation
CXCL12	GO:0008015	blood circulation
CXCL12	GO:0001944	vasculature development
CXCL12	GO:0001667	ameboidal cell migration
CXCL12	GO:0001764	neuron migration
CXCL12	GO:0030182	neuron differentiation
CXCL12	GO:0030334	regulation of cell migration
CXCL12	GO:0001763	morphogenesis of a branching structure
CXCL12	GO:0002684	positive regulation of immune system process
CXCL12	GO:0001569	patterning of blood vessels
CXCL12	GO:0001525	angiogenesis
CXCL12	GO:0000904	cell morphogenesis involved in differentiation
CXCL12	GO:0030005	cellular di-, tri-valent inorganic cation homeostasis
CXCL12	GO:0000902	cell morphogenesis
CXCL12	GO:0001568	blood vessel development
CXCL12	GO:0048878	chemical homeostasis
CXCL12	GO:0070661	leukocyte proliferation
CXCL12	GO:0055080	cation homeostasis
CXCL12	GO:0055074	calcium ion homeostasis
CXCL12	GO:0055066	di-, tri-valent inorganic cation homeostasis
CXCL12	GO:0051674	localization of cell
CXCL12	GO:0050920	regulation of chemotaxis
CXCL12	GO:0050921	positive regulation of chemotaxis
CXCL12	GO:0050926	regulation of positive chemotaxis
CXCL12	GO:0048666	neuron development
CXCL12	GO:0046651	lymphocyte proliferation
CXCL12	GO:0048520	positive regulation of behavior
CXCL12	GO:0048858	cell projection morphogenesis
CXCL12	GO:0048812	neuron projection morphogenesis
CXCL12	GO:0048667	cell morphogenesis involved in neuron differentiation
CXCL12	GO:0045321	leukocyte activation
CXCL12	GO:0048610	reproductive cellular process
CXCL12	GO:0051493	regulation of cytoskeleton organization
CXCL12	GO:0048609	reproductive process in a multicellular organism
CXCL12	GO:0050927	positive regulation of positive chemotaxis
CXCL12	GO:0048584	positive regulation of response to stimulus
CXCL12	GO:0050930	induction of positive chemotaxis
CXCL12	GO:0051270	regulation of cell motion
CXCL12	GO:0048754	branching morphogenesis of a tube
CXCL12	GO:0048514	blood vessel morphogenesis
CXCL12	GO:0055065	metal ion homeostasis
CXCL12	GO:0046649	lymphocyte activation
CXCL12	GO:0055082	cellular chemical homeostasis
CXCL12	GO:0050795	regulation of behavior
CXCL12	GO:0050801	ion homeostasis
CXCL12	GO:0042592	homeostatic process
CXCL12	GO:0051272	positive regulation of cell motion
CXCL12	GO:0042330	taxis
CXCL12	GO:0042098	T cell proliferation
CXCL12	GO:0048870	cell motility
CXCL12	GO:0042110	T cell activation
CXCL12	GO:0040017	positive regulation of locomotion
CXCL12	GO:0035295	tube development
CXCL12	GO:0035239	tube morphogenesis
CXCL12	GO:0033043	regulation of organelle organization
CXCL12	GO:0040012	regulation of locomotion
CXCL12	GO:0032990	cell part morphogenesis
CXCL12	GO:0032989	cellular component morphogenesis
CXCL12	GO:0032956	regulation of actin cytoskeleton organization
CXCL12	GO:0032943	mononuclear cell proliferation
CXCL12	GO:0032970	regulation of actin filament-based process
CXCL12	GO:0032535	regulation of cellular component size
CXCL12	GO:0032504	multicellular organism reproduction
CXCL12	GO:0032101	regulation of response to external stimulus
CXCL12	GO:0031175	neuron projection development
CXCL12	GO:0030832	regulation of actin filament length
CXCL12	GO:0032103	positive regulation of response to external stimulus
CXCL12	GO:0030335	positive regulation of cell migration
CYB5R2	GO:0016125	sterol metabolic process
CYB5R2	GO:0008202	steroid metabolic process
CYB5R2	GO:0006694	steroid biosynthetic process
CYB5R2	GO:0008610	lipid biosynthetic process
CYB5R2	GO:0016126	sterol biosynthetic process
CYB5R2	GO:0055114	oxidation reduction
CYP2C9	GO:0055114	oxidation reduction
CYP2C9	GO:0017144	drug metabolic process
CYP4B1	GO:0055114	oxidation reduction
CYP4F22	GO:0055114	oxidation reduction
CYTH4	GO:0051056	regulation of small GTPase mediated signal transduction
CYTH4	GO:0046578	regulation of Ras protein signal transduction
CYTH4	GO:0032012	regulation of ARF protein signal transduction
DACT1	GO:0007166	cell surface receptor linked signal transduction
DACT1	GO:0016055	Wnt receptor signaling pathway
DBF4	GO:0051329	interphase of mitotic cell cycle
DBF4	GO:0051325	interphase
DBF4	GO:0022403	cell cycle phase
DBF4	GO:0022402	cell cycle process
DBF4	GO:0006260	DNA replication
DBF4	GO:0000082	G1/S transition of mitotic cell cycle
DBF4	GO:0007049	cell cycle
DBF4	GO:0000278	mitotic cell cycle
DBF4	GO:0006259	DNA metabolic process
DCHS1	GO:0016337	cell-cell adhesion
DCHS1	GO:0007155	cell adhesion
DCHS1	GO:0016339	calcium-dependent cell-cell adhesion
DCHS1	GO:0007156	homophilic cell adhesion
DCHS1	GO:0022610	biological adhesion
DCHS2	GO:0007155	cell adhesion
DCHS2	GO:0022610	biological adhesion
DCHS2	GO:0016337	cell-cell adhesion
DCHS2	GO:0007156	homophilic cell adhesion
DEPDC5	GO:0007242	intracellular signaling cascade
DERL1	GO:0051789	response to protein stimulus
DERL1	GO:0051708	intracellular protein transport in other organism during symbiotic interaction
DERL1	GO:0051603	proteolysis involved in cellular protein catabolic process
DERL1	GO:0046907	intracellular transport
DERL1	GO:0046719	regulation of viral protein levels in host cell
DERL1	GO:0045184	establishment of protein localization
DERL1	GO:0044265	cellular macromolecule catabolic process
DERL1	GO:0044257	cellular protein catabolic process
DERL1	GO:0043632	modification-dependent macromolecule catabolic process
DERL1	GO:0043161	proteasomal ubiquitin-dependent protein catabolic process
DERL1	GO:0034976	response to endoplasmic reticulum stress
DERL1	GO:0034620	cellular response to unfolded protein
DERL1	GO:0034613	cellular protein localization
DERL1	GO:0042592	homeostatic process
DERL1	GO:0033554	cellular response to stress
DERL1	GO:0030970	retrograde protein transport, ER to cytosol
DERL1	GO:0030968	endoplasmic reticulum unfolded protein response
DERL1	GO:0030581	symbiont intracellular protein transport in host
DERL1	GO:0010033	response to organic substance
DERL1	GO:0019941	modification-dependent protein catabolic process
DERL1	GO:0019048	virus-host interaction
DERL1	GO:0019060	intracellular transport of viral proteins in host cell
DERL1	GO:0015031	protein transport
DERL1	GO:0048878	chemical homeostasis
DERL1	GO:0006886	intracellular protein transport
DERL1	GO:0070727	cellular macromolecule localization
DERL1	GO:0030163	protein catabolic process
DERL1	GO:0010498	proteasomal protein catabolic process
DERL1	GO:0008104	protein localization
DERL1	GO:0030433	ER-associated protein catabolic process
DERL1	GO:0006986	response to unfolded protein
DERL1	GO:0006984	ER-nuclear signaling pathway
DERL1	GO:0009057	macromolecule catabolic process
DERL1	GO:0006511	ubiquitin-dependent protein catabolic process
DERL1	GO:0006508	proteolysis
DERL1	GO:0022415	viral reproductive process
DERL1	GO:0016032	viral reproduction
DNAH2	GO:0007018	microtubule-based movement
DNAH2	GO:0051674	localization of cell
DNAH2	GO:0048870	cell motility
DNAH2	GO:0007017	microtubule-based process
DNAH2	GO:0006928	cell motion
DNAH2	GO:0001539	ciliary or flagellar motility
DNAH6	GO:0007018	microtubule-based movement
DNAH6	GO:0007017	microtubule-based process
DNAH8	GO:0048870	cell motility
DNAH8	GO:0006928	cell motion
DNAH8	GO:0007017	microtubule-based process
DNAH8	GO:0001539	ciliary or flagellar motility
DNAH8	GO:0007018	microtubule-based movement
DNAH8	GO:0051674	localization of cell
DNAH9	GO:0048609	reproductive process in a multicellular organism
DNAH9	GO:0048232	male gamete generation
DNAH9	GO:0032504	multicellular organism reproduction
DNAH9	GO:0030030	cell projection organization
DNAH9	GO:0007018	microtubule-based movement
DNAH9	GO:0007276	gamete generation
DNAH9	GO:0007283	spermatogenesis
DNAH9	GO:0007017	microtubule-based process
DNAH9	GO:0019953	sexual reproduction
DNAH9	GO:0006928	cell motion
DNAI1	GO:0030030	cell projection organization
DNAJB9	GO:0006457	protein folding
DNPEP	GO:0006518	peptide metabolic process
DNPEP	GO:0006508	proteolysis
DOPEY1	GO:0048193	Golgi vesicle transport
DOPEY1	GO:0046907	intracellular transport
DOPEY1	GO:0016192	vesicle-mediated transport
DOPEY1	GO:0016197	endosome transport
DOPEY1	GO:0015031	protein transport
DOPEY1	GO:0008104	protein localization
DOPEY1	GO:0045184	establishment of protein localization
DOPEY1	GO:0007029	endoplasmic reticulum organization
DOPEY1	GO:0006895	Golgi to endosome transport
DOPEY1	GO:0006892	post-Golgi vesicle-mediated transport
DPP3	GO:0006508	proteolysis
DPT	GO:0043062	extracellular structure organization
DPT	GO:0042127	regulation of cell proliferation
DPT	GO:0030199	collagen fibril organization
DPT	GO:0030198	extracellular matrix organization
DPT	GO:0022610	biological adhesion
DPT	GO:0008285	negative regulation of cell proliferation
DPT	GO:0007155	cell adhesion
DUPD1	GO:0006470	protein amino acid dephosphorylation
DUPD1	GO:0016311	dephosphorylation
DUPD1	GO:0006796	phosphate metabolic process
DUPD1	GO:0006793	phosphorus metabolic process
DYNC2H1	GO:0060271	cilium morphogenesis
DYNC2H1	GO:0051604	protein maturation
DYNC2H1	GO:0048736	appendage development
DYNC2H1	GO:0048598	embryonic morphogenesis
DYNC2H1	GO:0042384	cilium assembly
DYNC2H1	GO:0035108	limb morphogenesis
DYNC2H1	GO:0035107	appendage morphogenesis
DYNC2H1	GO:0032990	cell part morphogenesis
DYNC2H1	GO:0030900	forebrain development
DYNC2H1	GO:0030326	embryonic limb morphogenesis
DYNC2H1	GO:0030031	cell projection assembly
DYNC2H1	GO:0030030	cell projection organization
DYNC2H1	GO:0016485	protein processing
DYNC2H1	GO:0032989	cellular component morphogenesis
DYNC2H1	GO:0009953	dorsal/ventral pattern formation
DYNC2H1	GO:0009855	determination of bilateral symmetry
DYNC2H1	GO:0009799	determination of symmetry
DYNC2H1	GO:0008105	asymmetric protein localization
DYNC2H1	GO:0008104	protein localization
DYNC2H1	GO:0048858	cell projection morphogenesis
DYNC2H1	GO:0007389	pattern specification process
DYNC2H1	GO:0007368	determination of left/right symmetry
DYNC2H1	GO:0060173	limb development
DYNC2H1	GO:0007030	Golgi organization
DYNC2H1	GO:0035113	embryonic appendage morphogenesis
DYNC2H1	GO:0007018	microtubule-based movement
DYNC2H1	GO:0007017	microtubule-based process
DYNC2H1	GO:0003002	regionalization
DYNC2H1	GO:0000902	cell morphogenesis
ECEL1	GO:0007166	cell surface receptor linked signal transduction
ECEL1	GO:0006508	proteolysis
ECEL1	GO:0007242	intracellular signaling cascade
ECEL1	GO:0007218	neuropeptide signaling pathway
ECEL1	GO:0007186	G-protein coupled receptor protein signaling pathway
EIF2AK4	GO:0051789	response to protein stimulus
EIF2AK4	GO:0051248	negative regulation of protein metabolic process
EIF2AK4	GO:0043558	regulation of translational initiation in response to stress
EIF2AK4	GO:0043555	regulation of translation in response to stress
EIF2AK4	GO:0043039	tRNA aminoacylation
EIF2AK4	GO:0042594	response to starvation
EIF2AK4	GO:0034976	response to endoplasmic reticulum stress
EIF2AK4	GO:0034660	ncRNA metabolic process
EIF2AK4	GO:0033554	cellular response to stress
EIF2AK4	GO:0032269	negative regulation of cellular protein metabolic process
EIF2AK4	GO:0032268	regulation of cellular protein metabolic process
EIF2AK4	GO:0031668	cellular response to extracellular stimulus
EIF2AK4	GO:0031667	response to nutrient levels
EIF2AK4	GO:0031327	negative regulation of cellular biosynthetic process
EIF2AK4	GO:0031669	cellular response to nutrient levels
EIF2AK4	GO:0030968	endoplasmic reticulum unfolded protein response
EIF2AK4	GO:0017148	negative regulation of translation
EIF2AK4	GO:0016310	phosphorylation
EIF2AK4	GO:0010608	posttranscriptional regulation of gene expression
EIF2AK4	GO:0034620	cellular response to unfolded protein
EIF2AK4	GO:0043038	amino acid activation
EIF2AK4	GO:0010605	negative regulation of macromolecule metabolic process
EIF2AK4	GO:0010558	negative regulation of macromolecule biosynthetic process
EIF2AK4	GO:0010033	response to organic substance
EIF2AK4	GO:0009991	response to extracellular stimulus
EIF2AK4	GO:0009890	negative regulation of biosynthetic process
EIF2AK4	GO:0009267	cellular response to starvation
EIF2AK4	GO:0006986	response to unfolded protein
EIF2AK4	GO:0006984	ER-nuclear signaling pathway
EIF2AK4	GO:0006446	regulation of translational initiation
EIF2AK4	GO:0006412	translation
EIF2AK4	GO:0006399	tRNA metabolic process
EIF2AK4	GO:0006417	regulation of translation
EIF2AK4	GO:0006418	tRNA aminoacylation for protein translation
EIF2AK4	GO:0006468	protein amino acid phosphorylation
EIF2AK4	GO:0006793	phosphorus metabolic process
EIF2AK4	GO:0006796	phosphate metabolic process
EIF4G1	GO:0032268	regulation of cellular protein metabolic process
EIF4G1	GO:0010608	posttranscriptional regulation of gene expression
EIF4G1	GO:0006446	regulation of translational initiation
EIF4G1	GO:0006417	regulation of translation
EIF4G1	GO:0006412	translation
EPRS	GO:0065003	macromolecular complex assembly
EPRS	GO:0043933	macromolecular complex subunit organization
EPRS	GO:0043039	tRNA aminoacylation
EPRS	GO:0043038	amino acid activation
EPRS	GO:0034660	ncRNA metabolic process
EPRS	GO:0006461	protein complex assembly
EPRS	GO:0006418	tRNA aminoacylation for protein translation
EPRS	GO:0006412	translation
EPRS	GO:0006424	glutamyl-tRNA aminoacylation
EPRS	GO:0006433	prolyl-tRNA aminoacylation
EPRS	GO:0006399	tRNA metabolic process
EPRS	GO:0070271	protein complex biogenesis
ERCC5	GO:0060548	negative regulation of cell death
ERCC5	GO:0044265	cellular macromolecule catabolic process
ERCC5	GO:0043069	negative regulation of programmed cell death
ERCC5	GO:0043067	regulation of programmed cell death
ERCC5	GO:0042981	regulation of apoptosis
ERCC5	GO:0040007	growth
ERCC5	GO:0035264	multicellular organism growth
ERCC5	GO:0033683	nucleotide-excision repair, DNA incision
ERCC5	GO:0010259	multicellular organismal aging
ERCC5	GO:0010941	regulation of cell death
ERCC5	GO:0009416	response to light stimulus
ERCC5	GO:0009411	response to UV
ERCC5	GO:0009314	response to radiation
ERCC5	GO:0009057	macromolecule catabolic process
ERCC5	GO:0009628	response to abiotic stimulus
ERCC5	GO:0008340	determination of adult life span
ERCC5	GO:0043066	negative regulation of apoptosis
ERCC5	GO:0007568	aging
ERCC5	GO:0006974	response to DNA damage stimulus
ERCC5	GO:0006308	DNA catabolic process
ERCC5	GO:0010225	response to UV-C
ERCC5	GO:0033554	cellular response to stress
ERCC5	GO:0006295	nucleotide-excision repair, DNA incision, 3'-to lesion
ERCC5	GO:0006289	nucleotide-excision repair
ERCC5	GO:0006283	transcription-coupled nucleotide-excision repair
ERCC5	GO:0006281	DNA repair
ERCC5	GO:0006259	DNA metabolic process
ERCC5	GO:0009650	UV protection
ERCC5	GO:0000718	nucleotide-excision repair, DNA damage removal
ERCC5	GO:0000737	DNA catabolic process, endonucleolytic
ERCC6	GO:0080135	regulation of cellular response to stress
ERCC6	GO:0070302	regulation of stress-activated protein kinase signaling pathway
ERCC6	GO:0051338	regulation of transferase activity
ERCC6	GO:0051254	positive regulation of RNA metabolic process
ERCC6	GO:0051252	regulation of RNA metabolic process
ERCC6	GO:0051174	regulation of phosphorus metabolic process
ERCC6	GO:0051173	positive regulation of nitrogen compound metabolic process
ERCC6	GO:0050890	cognition
ERCC6	GO:0050877	neurological system process
ERCC6	GO:0046328	regulation of JNK cascade
ERCC6	GO:0045935	positive regulation of nucleobase, nucleoside, nucleotide and nucleic acid metabolic process
ERCC6	GO:0045860	positive regulation of protein kinase activity
ERCC6	GO:0045494	photoreceptor cell maintenance
ERCC6	GO:0045449	regulation of transcription
ERCC6	GO:0044093	positive regulation of molecular function
ERCC6	GO:0043549	regulation of kinase activity
ERCC6	GO:0043507	positive regulation of JUN kinase activity
ERCC6	GO:0043506	regulation of JUN kinase activity
ERCC6	GO:0043406	positive regulation of MAP kinase activity
ERCC6	GO:0043405	regulation of MAP kinase activity
ERCC6	GO:0043085	positive regulation of catalytic activity
ERCC6	GO:0043068	positive regulation of programmed cell death
ERCC6	GO:0043067	regulation of programmed cell death
ERCC6	GO:0043065	positive regulation of apoptosis
ERCC6	GO:0042981	regulation of apoptosis
ERCC6	GO:0042325	regulation of phosphorylation
ERCC6	GO:0033674	positive regulation of kinase activity
ERCC6	GO:0033554	cellular response to stress
ERCC6	GO:0032784	regulation of RNA elongation
ERCC6	GO:0032774	RNA biosynthetic process
ERCC6	GO:0032268	regulation of cellular protein metabolic process
ERCC6	GO:0031399	regulation of protein modification process
ERCC6	GO:0031098	stress-activated protein kinase signaling pathway
ERCC6	GO:0019220	regulation of phosphate metabolic process
ERCC6	GO:0016310	phosphorylation
ERCC6	GO:0012502	induction of programmed cell death
ERCC6	GO:0010942	positive regulation of cell death
ERCC6	GO:0010941	regulation of cell death
ERCC6	GO:0010627	regulation of protein kinase cascade
ERCC6	GO:0010604	positive regulation of macromolecule metabolic process
ERCC6	GO:0010332	response to gamma radiation
ERCC6	GO:0010224	response to UV-B
ERCC6	GO:0032147	activation of protein kinase activity
ERCC6	GO:0010212	response to ionizing radiation
ERCC6	GO:0010165	response to X-ray
ERCC6	GO:0010035	response to inorganic substance
ERCC6	GO:0009636	response to toxin
ERCC6	GO:0032786	positive regulation of RNA elongation
ERCC6	GO:0042770	DNA damage response, signal transduction
ERCC6	GO:0009628	response to abiotic stimulus
ERCC6	GO:0009416	response to light stimulus
ERCC6	GO:0009314	response to radiation
ERCC6	GO:0008630	DNA damage response, signal transduction resulting in induction of apoptosis
ERCC6	GO:0008629	induction of apoptosis by intracellular signals
ERCC6	GO:0007601	visual perception
ERCC6	GO:0007600	sensory perception
ERCC6	GO:0043408	regulation of MAPKKK cascade
ERCC6	GO:0007257	activation of JUN kinase activity
ERCC6	GO:0007256	activation of JNKK activity
ERCC6	GO:0007254	JNK cascade
ERCC6	GO:0007243	protein kinase cascade
ERCC6	GO:0043954	cellular component maintenance
ERCC6	GO:0007242	intracellular signaling cascade
ERCC6	GO:0006979	response to oxidative stress
ERCC6	GO:0009411	response to UV
ERCC6	GO:0006974	response to DNA damage stimulus
ERCC6	GO:0006917	induction of apoptosis
ERCC6	GO:0045859	regulation of protein kinase activity
ERCC6	GO:0006796	phosphate metabolic process
ERCC6	GO:0006793	phosphorus metabolic process
ERCC6	GO:0006468	protein amino acid phosphorylation
ERCC6	GO:0006366	transcription from RNA polymerase II promoter
ERCC6	GO:0050953	sensory perception of light stimulus
ERCC6	GO:0006355	regulation of transcription, DNA-dependent
ERCC6	GO:0006351	transcription, DNA-dependent
ERCC6	GO:0006350	transcription
ERCC6	GO:0006290	pyrimidine dimer repair
ERCC6	GO:0051347	positive regulation of transferase activity
ERCC6	GO:0006289	nucleotide-excision repair
ERCC6	GO:0006284	base-excision repair
ERCC6	GO:0006283	transcription-coupled nucleotide-excision repair
ERCC6	GO:0006281	DNA repair
ERCC6	GO:0006259	DNA metabolic process
ERCC6	GO:0001932	regulation of protein amino acid phosphorylation
ERCC6	GO:0000305	response to oxygen radical
ERCC6	GO:0000303	response to superoxide
ERCC6	GO:0000302	response to reactive oxygen species
ERCC6	GO:0000187	activation of MAPK activity
ERCC6	GO:0000186	activation of MAPKK activity
ERCC6	GO:0000165	MAPKKK cascade
ESAM	GO:0022610	biological adhesion
ESAM	GO:0016337	cell-cell adhesion
ESAM	GO:0007156	homophilic cell adhesion
ESAM	GO:0007155	cell adhesion
ESCO2	GO:0033554	cellular response to stress
ESCO2	GO:0007049	cell cycle
ESCO2	GO:0006974	response to DNA damage stimulus
ESCO2	GO:0006281	DNA repair
ESCO2	GO:0006259	DNA metabolic process
EVA1A	GO:0016265	death
EVA1A	GO:0012501	programmed cell death
EVA1A	GO:0008219	cell death
EVA1A	GO:0006915	apoptosis
EVA1A	GO:0006914	autophagy
F2RL2	GO:0050878	reg body fluids
F2RL2	GO:0050817	coagulation
F2RL2	GO:0009611	wound response
F2RL2	GO:0007166	cell surface receptor linked signal transduction
F2RL2	GO:0007596	blood coagulation
F2RL2	GO:0007186	G-protein coupled receptor protein signaling pathway
F2RL2	GO:0007599	hemostasis
F2RL2	GO:0042060	wound healing
F5	GO:0055114	oxidation reduction
F5	GO:0050878	reg body fluids
F5	GO:0050817	coagulation
F5	GO:0022610	biological adhesion
F5	GO:0008015	blood circulation
F5	GO:0007599	hemostasis
F5	GO:0042060	wound healing
F5	GO:0007596	blood coagulation
F5	GO:0007155	cell adhesion
F5	GO:0003013	circulatory system process
F5	GO:0009611	wound response
FANCA	GO:0070271	protein complex biogenesis
FANCA	GO:0065003	macromolecular complex assembly
FANCA	GO:0051327	M phase of meiotic cell cycle
FANCA	GO:0048608	reproductive structure development
FANCA	GO:0046661	male sex differentiation
FANCA	GO:0046660	female sex differentiation
FANCA	GO:0046546	development of primary male sexual characteristics
FANCA	GO:0046545	development of primary female sexual characteristics
FANCA	GO:0045137	development of primary sexual characteristics
FANCA	GO:0043933	macromolecular complex subunit organization
FANCA	GO:0042127	regulation of cell proliferation
FANCA	GO:0033554	cellular response to stress
FANCA	GO:0022403	cell cycle phase
FANCA	GO:0022402	cell cycle process
FANCA	GO:0008585	female gonad development
FANCA	GO:0007548	sex differentiation
FANCA	GO:0051321	meiotic cell cycle
FANCA	GO:0007140	male meiosis
FANCA	GO:0008584	male gonad development
FANCA	GO:0007126	meiosis
FANCA	GO:0007049	cell cycle
FANCA	GO:0006974	response to DNA damage stimulus
FANCA	GO:0006461	protein complex assembly
FANCA	GO:0006281	DNA repair
FANCA	GO:0006259	DNA metabolic process
FANCA	GO:0008406	gonad development
FANCA	GO:0003006	reproductive developmental process
FANCA	GO:0000279	M phase
FANCG	GO:0051726	regulation of cell cycle
FANCG	GO:0048610	reproductive cellular process
FANCG	GO:0048608	reproductive structure development
FANCG	GO:0048515	spermatid differentiation
FANCG	GO:0048511	rhythmic process
FANCG	GO:0048232	male gamete generation
FANCG	GO:0046660	female sex differentiation
FANCG	GO:0046545	development of primary female sexual characteristics
FANCG	GO:0045137	development of primary sexual characteristics
FANCG	GO:0033554	cellular response to stress
FANCG	GO:0042698	ovulation cycle
FANCG	GO:0032504	multicellular organism reproduction
FANCG	GO:0022602	ovulation cycle process
FANCG	GO:0019953	sexual reproduction
FANCG	GO:0009628	response to abiotic stimulus
FANCG	GO:0009314	response to radiation
FANCG	GO:0008585	female gonad development
FANCG	GO:0048609	reproductive process in a multicellular organism
FANCG	GO:0008406	gonad development
FANCG	GO:0007548	sex differentiation
FANCG	GO:0007286	spermatid development
FANCG	GO:0007283	spermatogenesis
FANCG	GO:0007281	germ cell development
FANCG	GO:0007276	gamete generation
FANCG	GO:0007005	mitochondrion organization
FANCG	GO:0006974	response to DNA damage stimulus
FANCG	GO:0006281	DNA repair
FANCG	GO:0006259	DNA metabolic process
FANCG	GO:0003006	reproductive developmental process
FANCG	GO:0001541	ovarian follicle development
FANCG	GO:0000075	cell cycle checkpoint
FASTKD3	GO:0016265	death
FASTKD3	GO:0012501	programmed cell death
FASTKD3	GO:0008219	cell death
FASTKD3	GO:0006915	apoptosis
FAT4	GO:0022610	biological adhesion
FAT4	GO:0016337	cell-cell adhesion
FAT4	GO:0007155	cell adhesion
FAT4	GO:0007156	homophilic cell adhesion
FBN2	GO:0060173	limb development
FBN2	GO:0048736	appendage development
FBN2	GO:0048598	embryonic morphogenesis
FBN2	GO:0035113	embryonic appendage morphogenesis
FBN2	GO:0035108	limb morphogenesis
FBN2	GO:0035107	appendage morphogenesis
FBN2	GO:0030326	embryonic limb morphogenesis
FGF20	GO:0048839	inner ear development
FGF20	GO:0043583	ear development
FGF20	GO:0042490	mechanoreceptor differentiation
FGF20	GO:0030182	neuron differentiation
FGF20	GO:0016049	cell growth
FGF20	GO:0060113	inner ear receptor cell differentiation
FGF20	GO:0008543	fibroblast growth factor receptor signaling pathway
FGF20	GO:0040007	growth
FGF20	GO:0008361	regulation of cell size
FGF20	GO:0007423	sensory organ development
FGF20	GO:0007267	cell-cell signaling
FGF20	GO:0007169	transmembrane receptor protein tyrosine kinase signaling pathway
FGF20	GO:0007167	enzyme linked receptor protein signaling pathway
FGF20	GO:0007166	cell surface receptor linked signal transduction
FGF20	GO:0032535	regulation of cellular component size
FRAS1	GO:0060429	epithelium development
FRAS1	GO:0048729	tissue morphogenesis
FRAS1	GO:0045184	establishment of protein localization
FRAS1	GO:0043588	skin development
FRAS1	GO:0015031	protein transport
FRAS1	GO:0008544	epidermis development
FRAS1	GO:0008104	protein localization
FRAS1	GO:0007398	ectoderm development
FRAS1	GO:0002009	morphogenesis of an epithelium
FREM3	GO:0022610	biological adhesion
FREM3	GO:0007155	cell adhesion
FURIN	GO:0060548	negative regulation of cell death
FURIN	GO:0052548	regulation of endopeptidase activity
FURIN	GO:0052547	regulation of peptidase activity
FURIN	GO:0051604	protein maturation
FURIN	GO:0051336	regulation of hydrolase activity
FURIN	GO:0051272	positive regulation of cell motion
FURIN	GO:0051248	negative regulation of protein metabolic process
FURIN	GO:0051247	positive regulation of protein metabolic process
FURIN	GO:0051241	negative regulation of multicellular organismal process
FURIN	GO:0051043	regulation of membrane protein ectodomain proteolysis
FURIN	GO:0046903	secretion
FURIN	GO:0045862	positive regulation of proteolysis
FURIN	GO:0051270	regulation of cell motion
FURIN	GO:0043523	regulation of neuron apoptosis
FURIN	GO:0043524	negative regulation of neuron apoptosis
FURIN	GO:0043069	negative regulation of programmed cell death
FURIN	GO:0043066	negative regulation of apoptosis
FURIN	GO:0043043	peptide biosynthetic process
FURIN	GO:0042981	regulation of apoptosis
FURIN	GO:0042445	hormone metabolic process
FURIN	GO:0042176	regulation of protein catabolic process
FURIN	GO:0040017	positive regulation of locomotion
FURIN	GO:0032940	secretion by cell
FURIN	GO:0032911	negative regulation of transforming growth factor-beta1 production
FURIN	GO:0032908	regulation of transforming growth factor-beta1 production
FURIN	GO:0032903	regulation of nerve growth factor production
FURIN	GO:0042177	negative regulation of protein catabolic process
FURIN	GO:0032902	nerve growth factor production
FURIN	GO:0032900	negative regulation of neurotrophin production
FURIN	GO:0032904	negative regulation of nerve growth factor production
FURIN	GO:0032899	regulation of neurotrophin production
FURIN	GO:0032898	neurotrophin production
FURIN	GO:0032804	negative regulation of low-density lipoprotein receptor catabolic process
FURIN	GO:0032803	regulation of low-density lipoprotein receptor catabolic process
FURIN	GO:0032269	negative regulation of cellular protein metabolic process
FURIN	GO:0032268	regulation of cellular protein metabolic process
FURIN	GO:0045732	positive regulation of protein catabolic process
FURIN	GO:0040012	regulation of locomotion
FURIN	GO:0031331	positive regulation of cellular catabolic process
FURIN	GO:0031330	negative regulation of cellular catabolic process
FURIN	GO:0031329	regulation of cellular catabolic process
FURIN	GO:0030511	positive regulation of transforming growth factor beta receptor signaling pathway
FURIN	GO:0043067	regulation of programmed cell death
FURIN	GO:0030334	regulation of cell migration
FURIN	GO:0019067	viral assembly, maturation, egress, and release
FURIN	GO:0022415	viral reproductive process
FURIN	GO:0016486	peptide hormone processing
FURIN	GO:0016485	protein processing
FURIN	GO:0010941	regulation of cell death
FURIN	GO:0010817	regulation of hormone levels
FURIN	GO:0051044	positive regulation of membrane protein ectodomain proteolysis
FURIN	GO:0010647	positive regulation of cell communication
FURIN	GO:0010605	negative regulation of macromolecule metabolic process
FURIN	GO:0010604	positive regulation of macromolecule metabolic process
FURIN	GO:0009967	positive regulation of signal transduction
FURIN	GO:0009896	positive regulation of catabolic process
FURIN	GO:0016032	viral reproduction
FURIN	GO:0009895	negative regulation of catabolic process
FURIN	GO:0051605	protein maturation by peptide bond cleavage
FURIN	GO:0017015	regulation of transforming growth factor beta receptor signaling pathway
FURIN	GO:0009894	regulation of catabolic process
FURIN	GO:0008283	cell proliferation
FURIN	GO:0006518	peptide metabolic process
FURIN	GO:0030162	regulation of proteolysis
FURIN	GO:0006508	proteolysis
FURIN	GO:0006465	signal peptide processing
FURIN	GO:0032455	nerve growth factor processing
FURIN	GO:0001818	negative regulation of cytokine production
FURIN	GO:0019058	viral infectious cycle
FURIN	GO:0001817	regulation of cytokine production
FURIN	GO:0032270	positive regulation of cellular protein metabolic process
FURIN	GO:0030335	positive regulation of cell migration
G6PC	GO:0055092	sterol homeostasis
G6PC	GO:0055088	lipid homeostasis
G6PC	GO:0051156	glucose 6-phosphate metabolic process
G6PC	GO:0046838	phosphorylated carbohydrate dephosphorylation
G6PC	GO:0046486	glycerolipid metabolic process
G6PC	GO:0046415	urate metabolic process
G6PC	GO:0046165	alcohol biosynthetic process
G6PC	GO:0044264	cellular polysaccharide metabolic process
G6PC	GO:0042593	glucose homeostasis
G6PC	GO:0040007	growth
G6PC	GO:0042632	cholesterol homeostasis
G6PC	GO:0035264	multicellular organism growth
G6PC	GO:0034637	cellular carbohydrate biosynthetic process
G6PC	GO:0032094	response to food
G6PC	GO:0046364	monosaccharide biosynthetic process
G6PC	GO:0019319	hexose biosynthetic process
G6PC	GO:0018904	organic ether metabolic process
G6PC	GO:0016311	dephosphorylation
G6PC	GO:0016052	carbohydrate catabolic process
G6PC	GO:0016051	carbohydrate biosynthetic process
G6PC	GO:0015758	glucose transport
G6PC	GO:0015749	monosaccharide transport
G6PC	GO:0015712	hexose phosphate transport
G6PC	GO:0044247	cellular polysaccharide catabolic process
G6PC	GO:0009991	response to extracellular stimulus
G6PC	GO:0009251	glucan catabolic process
G6PC	GO:0019318	hexose metabolic process
G6PC	GO:0031667	response to nutrient levels
G6PC	GO:0044275	cellular carbohydrate catabolic process
G6PC	GO:0033500	carbohydrate homeostasis
G6PC	GO:0044042	glucan metabolic process
G6PC	GO:0042592	homeostatic process
G6PC	GO:0009057	macromolecule catabolic process
G6PC	GO:0008645	hexose transport
G6PC	GO:0015980	energy derivation by oxidation of organic compounds
G6PC	GO:0008643	carbohydrate transport
G6PC	GO:0008202	steroid metabolic process
G6PC	GO:0006796	phosphate metabolic process
G6PC	GO:0006793	phosphorus metabolic process
G6PC	GO:0015760	glucose-6-phosphate transport
G6PC	GO:0006662	glycerol ether metabolic process
G6PC	GO:0006641	triglyceride metabolic process
G6PC	GO:0048878	chemical homeostasis
G6PC	GO:0006639	acylglycerol metabolic process
G6PC	GO:0006638	neutral lipid metabolic process
G6PC	GO:0006112	energy reserve metabolic process
G6PC	GO:0006094	gluconeogenesis
G6PC	GO:0006091	generation of precursor metabolites and energy
G6PC	GO:0006090	pyruvate metabolic process
G6PC	GO:0006073	cellular glucan metabolic process
G6PC	GO:0006006	glucose metabolic process
G6PC	GO:0005996	monosaccharide metabolic process
G6PC	GO:0005980	glycogen catabolic process
G6PC	GO:0005976	polysaccharide metabolic process
G6PC	GO:0005977	glycogen metabolic process
G6PC	GO:0000272	polysaccharide catabolic process
GHRH	GO:0060341	regulation of cellular localization
GHRH	GO:0060124	positive regulation of growth hormone secretion
GHRH	GO:0055082	cellular chemical homeostasis
GHRH	GO:0055080	cation homeostasis
GHRH	GO:0060123	regulation of growth hormone secretion
GHRH	GO:0055074	calcium ion homeostasis
GHRH	GO:0055065	metal ion homeostasis
GHRH	GO:0051480	cytosolic calcium ion homeostasis
GHRH	GO:0051349	positive regulation of lyase activity
GHRH	GO:0051240	positive regulation of multicellular organismal process
GHRH	GO:0051173	positive regulation of nitrogen compound metabolic process
GHRH	GO:0051050	positive regulation of transport
GHRH	GO:0051047	positive regulation of secretion
GHRH	GO:0051046	regulation of secretion
GHRH	GO:0050795	regulation of behavior
GHRH	GO:0048878	chemical homeostasis
GHRH	GO:0048732	gland development
GHRH	GO:0048584	positive regulation of response to stimulus
GHRH	GO:0048520	positive regulation of behavior
GHRH	GO:0048511	rhythmic process
GHRH	GO:0046887	positive regulation of hormone secretion
GHRH	GO:0046879	hormone secretion
GHRH	GO:0046903	secretion
GHRH	GO:0046005	positive regulation of circadian sleep/wake cycle, REM sleep
GHRH	GO:0045981	positive regulation of nucleotide metabolic process
GHRH	GO:0045938	positive regulation of circadian sleep/wake cycle, sleep
GHRH	GO:0045935	positive regulation of nucleobase, nucleoside, nucleotide and nucleic acid metabolic process
GHRH	GO:0045927	positive regulation of growth
GHRH	GO:0045762	positive regulation of adenylate cyclase activity
GHRH	GO:0045449	regulation of transcription
GHRH	GO:0045187	regulation of circadian sleep/wake cycle, sleep
GHRH	GO:0043568	positive regulation of insulin-like growth factor receptor signaling pathway
GHRH	GO:0043567	regulation of insulin-like growth factor receptor signaling pathway
GHRH	GO:0043085	positive regulation of catalytic activity
GHRH	GO:0042752	regulation of circadian rhythm
GHRH	GO:0042749	regulation of circadian sleep/wake cycle
GHRH	GO:0042745	circadian sleep/wake cycle
GHRH	GO:0042320	regulation of circadian sleep/wake cycle, REM sleep
GHRH	GO:0040018	positive regulation of multicellular organism growth
GHRH	GO:0045761	regulation of adenylate cyclase activity
GHRH	GO:0040008	regulation of growth
GHRH	GO:0035270	endocrine system development
GHRH	GO:0032940	secretion by cell
GHRH	GO:0031667	response to nutrient levels
GHRH	GO:0031328	positive regulation of cellular biosynthetic process
GHRH	GO:0031281	positive regulation of cyclase activity
GHRH	GO:0031279	regulation of cyclase activity
GHRH	GO:0040014	regulation of multicellular organism growth
GHRH	GO:0030900	forebrain development
GHRH	GO:0030819	positive regulation of cAMP biosynthetic process
GHRH	GO:0030817	regulation of cAMP biosynthetic process
GHRH	GO:0042127	regulation of cell proliferation
GHRH	GO:0032094	response to food
GHRH	GO:0030814	regulation of cAMP metabolic process
GHRH	GO:0030810	positive regulation of nucleotide biosynthetic process
GHRH	GO:0030808	regulation of nucleotide biosynthetic process
GHRH	GO:0030801	positive regulation of cyclic nucleotide metabolic process
GHRH	GO:0030799	regulation of cyclic nucleotide metabolic process
GHRH	GO:0042592	homeostatic process
GHRH	GO:0030072	peptide hormone secretion
GHRH	GO:0030003	cellular cation homeostasis
GHRH	GO:0042753	positive regulation of circadian rhythm
GHRH	GO:0022410	circadian sleep/wake cycle process
GHRH	GO:0021983	pituitary gland development
GHRH	GO:0021536	diencephalon development
GHRH	GO:0044093	positive regulation of molecular function
GHRH	GO:0019935	cyclic-nucleotide-mediated signaling
GHRH	GO:0019933	cAMP-mediated signaling
GHRH	GO:0019932	2nd msgr signal
GHRH	GO:0021984	adenohypophysis development
GHRH	GO:0030005	cellular di-, tri-valent inorganic cation homeostasis
GHRH	GO:0019725	cellular homeostasis
GHRH	GO:0015833	peptide transport
GHRH	GO:0010817	regulation of hormone levels
GHRH	GO:0030252	growth hormone secretion
GHRH	GO:0010647	positive regulation of cell communication
GHRH	GO:0010628	positive regulation of gene expression
GHRH	GO:0045941	positive regulation of transcription
GHRH	GO:0046883	regulation of hormone secretion
GHRH	GO:0010604	positive regulation of macromolecule metabolic process
GHRH	GO:0010579	positive regulation of adenylate cyclase activity by G-protein signaling pathway
GHRH	GO:0048512	circadian behavior
GHRH	GO:0010578	regulation of adenylate cyclase activity involved in G-protein signaling
GHRH	GO:0030816	positive regulation of cAMP metabolic process
GHRH	GO:0010557	positive regulation of macromolecule biosynthetic process
GHRH	GO:0009991	response to extracellular stimulus
GHRH	GO:0009967	positive regulation of signal transduction
GHRH	GO:0030804	positive regulation of cyclic nucleotide biosynthetic process
GHRH	GO:0009914	hormone transport
GHRH	GO:0009891	positive regulation of biosynthetic process
GHRH	GO:0050801	ion homeostasis
GHRH	GO:0008284	positive regulation of cell proliferation
GHRH	GO:0007623	circadian rhythm
GHRH	GO:0030802	regulation of cyclic nucleotide biosynthetic process
GHRH	GO:0007610	behavior
GHRH	GO:0051339	regulation of lyase activity
GHRH	GO:0007267	cell-cell signaling
GHRH	GO:0007242	intracellular signaling cascade
GHRH	GO:0007622	rhythmic behavior
GHRH	GO:0007204	elevation of cytosolic calcium ion concentration
GHRH	GO:0007190	activation of adenylate cyclase activity
GHRH	GO:0055066	di-, tri-valent inorganic cation homeostasis
GHRH	GO:0007189	activation of adenylate cyclase activity by G-protein signaling pathway
GHRH	GO:0007188	G-protein signaling, coupled to cAMP nucleotide second messenger
GHRH	GO:0007186	G-protein coupled receptor protein signaling pathway
GHRH	GO:0007166	cell surface receptor linked signal transduction
GHRH	GO:0007187	G-protein signaling, coupled to cyclic nucleotide second messenger
GHRH	GO:0006875	cellular metal ion homeostasis
GHRH	GO:0006874	cellular calcium ion homeostasis
GHRH	GO:0006873	cellular ion homeostasis
GHRH	GO:0006140	regulation of nucleotide metabolic process
GHRH	GO:0003001	generation of a signal involved in cell-cell signaling
GHRH	GO:0002793	positive regulation of peptide secretion
GHRH	GO:0002791	regulation of peptide secretion
GHRH	GO:0002790	peptide secretion
GMNN	GO:0051726	regulation of cell cycle
GMNN	GO:0051172	negative regulation of nitrogen compound metabolic process
GMNN	GO:0051053	negative regulation of DNA metabolic process
GMNN	GO:0045934	negative regulation of nucleobase, nucleoside, nucleotide and nucleic acid metabolic process
GMNN	GO:0045786	negative regulation of cell cycle
GMNN	GO:0051052	regulation of DNA metabolic process
GMNN	GO:0031327	negative regulation of cellular biosynthetic process
GMNN	GO:0010605	negative regulation of macromolecule metabolic process
GMNN	GO:0010558	negative regulation of macromolecule biosynthetic process
GMNN	GO:0009890	negative regulation of biosynthetic process
GMNN	GO:0008156	negative regulation of DNA replication
GMNN	GO:0007049	cell cycle
GMNN	GO:0006275	regulation of DNA replication
GPNMB	GO:0060348	bone development
GPNMB	GO:0042127	regulation of cell proliferation
GPNMB	GO:0031214	biomineral formation
GPNMB	GO:0030282	bone mineralization
GPNMB	GO:0022610	biological adhesion
GPNMB	GO:0008285	negative regulation of cell proliferation
GPNMB	GO:0007155	cell adhesion
GPNMB	GO:0001503	ossification
GPNMB	GO:0001501	skeletal system development
GPNMB	GO:0001649	osteoblast differentiation
GPR133	GO:0007218	neuropeptide signaling pathway
GPR133	GO:0007166	cell surface receptor linked signal transduction
GPR133	GO:0007186	G-protein coupled receptor protein signaling pathway
GPR144	GO:0007218	neuropeptide signaling pathway
GPR144	GO:0007186	G-protein coupled receptor protein signaling pathway
GPR144	GO:0007166	cell surface receptor linked signal transduction
GPRC6A	GO:0019932	2nd msgr signal
GPRC6A	GO:0019722	calcium-mediated signaling
GPRC6A	GO:0007242	intracellular signaling cascade
GPRC6A	GO:0007186	G-protein coupled receptor protein signaling pathway
GPRC6A	GO:0007166	cell surface receptor linked signal transduction
GUCA1C	GO:0050953	sensory perception of light stimulus
GUCA1C	GO:0050890	cognition
GUCA1C	GO:0050877	neurological system process
GUCA1C	GO:0007601	visual perception
GUCA1C	GO:0007600	sensory perception
GUCY1A3	GO:0075136	response to host
GUCY1A3	GO:0052572	response to host immune response
GUCY1A3	GO:0052565	response to defense-related host nitric oxide production
GUCY1A3	GO:0052564	response to immune response of other organism during symbiotic interaction
GUCY1A3	GO:0052200	response to host defenses
GUCY1A3	GO:0052173	response to defenses of other organism during symbiotic interaction
GUCY1A3	GO:0051241	negative regulation of multicellular organismal process
GUCY1A3	GO:0050880	regulation of blood vessel size
GUCY1A3	GO:0046068	cGMP metabolic process
GUCY1A3	GO:0045986	negative regulation of smooth muscle contraction
GUCY1A3	GO:0045981	positive regulation of nucleotide metabolic process
GUCY1A3	GO:0045935	positive regulation of nucleobase, nucleoside, nucleotide and nucleic acid metabolic process
GUCY1A3	GO:0045932	negative regulation of muscle contraction
GUCY1A3	GO:0044271	nitrogen compound biosynthetic process
GUCY1A3	GO:0042311	vasodilation
GUCY1A3	GO:0035150	regulation of tube size
GUCY1A3	GO:0034654	nucleobase, nucleoside, nucleotide and nucleic acid biosynthetic process
GUCY1A3	GO:0034404	nucleobase, nucleoside and nucleotide biosynthetic process
GUCY1A3	GO:0030826	regulation of cGMP biosynthetic process
GUCY1A3	GO:0030825	positive regulation of cGMP metabolic process
GUCY1A3	GO:0030810	positive regulation of nucleotide biosynthetic process
GUCY1A3	GO:0030808	regulation of nucleotide biosynthetic process
GUCY1A3	GO:0030804	positive regulation of cyclic nucleotide biosynthetic process
GUCY1A3	GO:0030802	regulation of cyclic nucleotide biosynthetic process
GUCY1A3	GO:0044057	regulation of system process
GUCY1A3	GO:0030801	positive regulation of cyclic nucleotide metabolic process
GUCY1A3	GO:0030823	regulation of cGMP metabolic process
GUCY1A3	GO:0030828	positive regulation of cGMP biosynthetic process
GUCY1A3	GO:0030799	regulation of cyclic nucleotide metabolic process
GUCY1A3	GO:0009891	positive regulation of biosynthetic process
GUCY1A3	GO:0009190	cyclic nucleotide biosynthetic process
GUCY1A3	GO:0009187	cyclic nucleotide metabolic process
GUCY1A3	GO:0009165	nucleotide biosynthetic process
GUCY1A3	GO:0051173	positive regulation of nitrogen compound metabolic process
GUCY1A3	GO:0009124	nucleoside monophosphate biosynthetic process
GUCY1A3	GO:0009123	nucleoside monophosphate metabolic process
GUCY1A3	GO:0052551	response to defense-related nitric oxide production by other organism during symbiotic interaction
GUCY1A3	GO:0008217	regulation of blood pressure
GUCY1A3	GO:0031328	positive regulation of cellular biosynthetic process
GUCY1A3	GO:0008015	blood circulation
GUCY1A3	GO:0060087	relaxation of vascular smooth muscle
GUCY1A3	GO:0007263	nitric oxide mediated signal transduction
GUCY1A3	GO:0007242	intracellular signaling cascade
GUCY1A3	GO:0006940	regulation of smooth muscle contraction
GUCY1A3	GO:0006937	regulation of muscle contraction
GUCY1A3	GO:0006182	cGMP biosynthetic process
GUCY1A3	GO:0006164	purine nucleotide biosynthetic process
GUCY1A3	GO:0006163	purine nucleotide metabolic process
GUCY1A3	GO:0006140	regulation of nucleotide metabolic process
GUCY1A3	GO:0003013	circulatory system process
GUCY1A3	GO:0003012	muscle system process
GUCY1A3	GO:0003018	vascular process in circulatory system
HELZ2	GO:0045449	regulation of transcription
HELZ2	GO:0006350	transcription
HIST1H1B	GO:0065004	protein-DNA complex assembly
HIST1H1B	GO:0065003	macromolecular complex assembly
HIST1H1B	GO:0051276	chromosome organization
HIST1H1B	GO:0043933	macromolecular complex subunit organization
HIST1H1B	GO:0034728	nucleosome organization
HIST1H1B	GO:0034622	cellular macromolecular complex assembly
HIST1H1B	GO:0034621	cellular macromolecular complex subunit organization
HIST1H1B	GO:0031497	chromatin assembly
HIST1H1B	GO:0006333	chromatin assembly or disassembly
HIST1H1B	GO:0006325	chromatin organization
HIST1H1B	GO:0006334	nucleosome assembly
HIST1H1B	GO:0007517	muscle organ development
HIST1H1B	GO:0006323	DNA packaging
HLA-DPB1	GO:0019882	antigen processing and presentation
HLA-DPB1	GO:0009405	pathogenesis
HLA-DPB1	GO:0006955	immune response
HLA-DPB1	GO:0002504	antigen processing and presentation of peptide or polysaccharide antigen via MHC class II
HPD	GO:0055114	oxidation reduction
HPD	GO:0016054	organic acid catabolic process
HPD	GO:0009310	amine catabolic process
HPD	GO:0009074	aromatic amino acid family catabolic process
HPD	GO:0009072	aromatic amino acid family metabolic process
HPD	GO:0009063	cellular amino acid catabolic process
HPD	GO:0006572	tyrosine catabolic process
HPD	GO:0006570	tyrosine metabolic process
HPD	GO:0006559	L-phenylalanine catabolic process
HPD	GO:0046395	carboxylic acid catabolic process
HPD	GO:0006558	L-phenylalanine metabolic process
HPD	GO:0019439	aromatic compound catabolic process
HS3ST4	GO:0006790	sulfur metabolic process
HS3ST4	GO:0006029	proteoglycan metabolic process
HS3ST4	GO:0009100	glycoprotein metabolic process
HS3ST4	GO:0030201	heparan sulfate proteoglycan metabolic process
HSPA1L	GO:0060249	anatomical structure homeostasis
HSPA1L	GO:0051789	response to protein stimulus
HSPA1L	GO:0051276	chromosome organization
HSPA1L	GO:0042592	homeostatic process
HSPA1L	GO:0033554	cellular response to stress
HSPA1L	GO:0032200	telomere organization
HSPA1L	GO:0010033	response to organic substance
HSPA1L	GO:0006986	response to unfolded protein
HSPA1L	GO:0000723	telomere maintenance
HSPA1L	GO:0006259	DNA metabolic process
HSPA1L	GO:0009266	response to temperature stimulus
HSPA1L	GO:0009408	response to heat
HSPA1L	GO:0009628	response to abiotic stimulus
HSPA1L	GO:0006281	DNA repair
HSPA1L	GO:0006974	response to DNA damage stimulus
HTR2B	GO:0060191	regulation of lipase activity
HTR2B	GO:0051345	positive regulation of hydrolase activity
HTR2B	GO:0051336	regulation of hydrolase activity
HTR2B	GO:0044093	positive regulation of molecular function
HTR2B	GO:0043123	positive regulation of I-kappaB kinase/NF-kappaB cascade
HTR2B	GO:0043122	regulation of I-kappaB kinase/NF-kappaB cascade
HTR2B	GO:0043085	positive regulation of catalytic activity
HTR2B	GO:0019932	2nd msgr signal
HTR2B	GO:0010863	positive regulation of phospholipase C activity
HTR2B	GO:0010740	positive regulation of protein kinase cascade
HTR2B	GO:0048015	phosphoinositide-mediated signaling
HTR2B	GO:0010647	positive regulation of cell communication
HTR2B	GO:0010627	regulation of protein kinase cascade
HTR2B	GO:0010518	positive regulation of phospholipase activity
HTR2B	GO:0010517	regulation of phospholipase activity
HTR2B	GO:0060193	positive regulation of lipase activity
HTR2B	GO:0009967	positive regulation of signal transduction
HTR2B	GO:0008015	blood circulation
HTR2B	GO:0007507	heart development
HTR2B	GO:0007242	intracellular signaling cascade
HTR2B	GO:0007202	activation of phospholipase C activity
HTR2B	GO:0007200	activation of phospholipase C activity by G-protein coupled receptor protein signaling pathway coupled to IP3 second messenger
HTR2B	GO:0007186	G-protein coupled receptor protein signaling pathway
HTR2B	GO:0007166	cell surface receptor linked signal transduction
HTR2B	GO:0003013	circulatory system process
IFI35	GO:0006955	immune response
IFI35	GO:0009615	response to virus
IFI44L	GO:0006955	immune response
IL17RB	GO:0040008	regulation of growth
IL17RB	GO:0006952	defense response
IL17RB	GO:0001558	regulation of cell growth
IL18BP	GO:0042088	T-helper 1 type immune response
IL18BP	GO:0006955	immune response
IL18BP	GO:0002460	adaptive immune response based on somatic recombination of immune receptors built from immunoglobulin superfamily domains
IL18BP	GO:0002250	adaptive immune response
IL6	GO:0030335	positive regulation of cell migration
IL6	GO:0030334	regulation of cell migration
IL6	GO:0030278	regulation of ossification
IL6	GO:0030168	platelet activation
IL6	GO:0030595	leukocyte chemotaxis
IL6	GO:0030072	peptide hormone secretion
IL6	GO:0030030	cell projection organization
IL6	GO:0019220	regulation of phosphate metabolic process
IL6	GO:0016477	cell migration
IL6	GO:0016265	death
IL6	GO:0015833	peptide transport
IL6	GO:0012501	programmed cell death
IL6	GO:0010941	regulation of cell death
IL6	GO:0010817	regulation of hormone levels
IL6	GO:0010713	negative regulation of collagen metabolic process
IL6	GO:0010712	regulation of collagen metabolic process
IL6	GO:0010647	positive regulation of cell communication
IL6	GO:0010627	regulation of protein kinase cascade
IL6	GO:0010608	posttranscriptional regulation of gene expression
IL6	GO:0010605	negative regulation of macromolecule metabolic process
IL6	GO:0010574	regulation of vascular endothelial growth factor production
IL6	GO:0010558	negative regulation of macromolecule biosynthetic process
IL6	GO:0010557	positive regulation of macromolecule biosynthetic process
IL6	GO:0010604	positive regulation of macromolecule metabolic process
IL6	GO:0010033	response to organic substance
IL6	GO:0009967	positive regulation of signal transduction
IL6	GO:0009914	hormone transport
IL6	GO:0009890	negative regulation of biosynthetic process
IL6	GO:0009725	response to hormone stimulus
IL6	GO:0009719	response to endogenous stimulus
IL6	GO:0009615	response to virus
IL6	GO:0009611	wound response
IL6	GO:0009617	response to bacterium
IL6	GO:0008285	negative regulation of cell proliferation
IL6	GO:0008219	cell death
IL6	GO:0007626	locomotory behavior
IL6	GO:0007610	behavior
IL6	GO:0007599	hemostasis
IL6	GO:0007267	cell-cell signaling
IL6	GO:0006959	humoral immune response
IL6	GO:0008284	positive regulation of cell proliferation
IL6	GO:0006955	immune response
[truncated: 2,516 more rows]

## Sheet: Supplemental Table 7
Gene	GOCode	Ontology
ABCA4	GO:0050953	sensory perception of light stimulus
ABCA4	GO:0006869	lipid transport
ABCA4	GO:0050890	cognition
ABCA4	GO:0045494	photoreceptor cell maintenance
ABCA4	GO:0009314	response to radiation
ABCA4	GO:0009581	detection of external stimulus
ABCA4	GO:0007601	visual perception
ABCA4	GO:0050877	neurological system process
ABCA4	GO:0010876	lipid localization
ABCA4	GO:0007600	sensory perception
ABCA4	GO:0043954	cellular component maintenance
ABCA4	GO:0009416	response to light stimulus
ABCA4	GO:0006649	phospholipid transfer to membrane
ABCA4	GO:0015914	phospholipid transport
ABCA4	GO:0009628	response to abiotic stimulus
ABCA4	GO:0009584	detection of visible light
ABCA4	GO:0007603	phototransduction, visible light
ABCA4	GO:0051606	detection of stimulus
ABCA4	GO:0009583	detection of light stimulus
ABCA4	GO:0009582	detection of abiotic stimulus
ABCA4	GO:0016044	membrane organization
ABCA4	GO:0007602	phototransduction
ABCB8	GO:0055085	transmembrane transport
ABCC8	GO:0030001	metal ion transport
ABCC8	GO:0006812	cation transport
ABCC8	GO:0055085	transmembrane transport
ABCC8	GO:0006813	potassium ion transport
ABCC8	GO:0006811	ion transport
ABCC8	GO:0015672	monovalent inorganic cation transport
ABCG5	GO:0044241	lipid digestion
ABCG5	GO:0044058	regulation of digestive system process
ABCG5	GO:0006869	lipid transport
ABCG5	GO:0050892	intestinal absorption
ABCG5	GO:0032374	regulation of cholesterol transport
ABCG5	GO:0010212	response to ionizing radiation
ABCG5	GO:0048878	chemical homeostasis
ABCG5	GO:0032371	regulation of sterol transport
ABCG5	GO:0044057	regulation of system process
ABCG5	GO:0051051	negative regulation of transport
ABCG5	GO:0042632	cholesterol homeostasis
ABCG5	GO:0032372	negative regulation of sterol transport
ABCG5	GO:0007586	digestion
ABCG5	GO:0033344	cholesterol efflux
ABCG5	GO:0032369	negative regulation of lipid transport
ABCG5	GO:0009628	response to abiotic stimulus
ABCG5	GO:0032375	negative regulation of cholesterol transport
ABCG5	GO:0060457	negative regulation of digestive system process
ABCG5	GO:0030300	regulation of intestinal cholesterol absorption
ABCG5	GO:0042493	response to drug
ABCG5	GO:0007584	response to nutrient
ABCG5	GO:0030301	cholesterol transport
ABCG5	GO:0045796	negative regulation of intestinal cholesterol absorption
ABCG5	GO:0046903	secretion
ABCG5	GO:0007588	excretion
ABCG5	GO:0015918	sterol transport
ABCG5	GO:0022600	digestive system process
ABCG5	GO:0042592	homeostatic process
ABCG5	GO:0051241	negative regulation of multicellular organismal process
ABCG5	GO:0055092	sterol homeostasis
ABCG5	GO:0031667	response to nutrient levels
ABCG5	GO:0010876	lipid localization
ABCG5	GO:0009991	response to extracellular stimulus
ABCG5	GO:0055088	lipid homeostasis
ABCG5	GO:0009314	response to radiation
ABCG5	GO:0030299	intestinal cholesterol absorption
ABCG5	GO:0032368	regulation of lipid transport
ABCG5	GO:0010949	negative regulation of intestinal phytosterol absorption
ABP1	GO:0055114	oxidation reduction
ACAP1	GO:0032318	regulation of Ras GTPase activity
ACAP1	GO:0007242	intracellular signaling cascade
ACAP1	GO:0045184	establishment of protein localization
ACAP1	GO:0043087	regulation of GTPase activity
ACAP1	GO:0032012	regulation of ARF protein signal transduction
ACAP1	GO:0046578	regulation of Ras protein signal transduction
ACAP1	GO:0032312	regulation of ARF GTPase activity
ACAP1	GO:0051056	regulation of small GTPase mediated signal transduction
ACAP1	GO:0015031	protein transport
ACAP1	GO:0051336	regulation of hydrolase activity
ACAP1	GO:0008104	protein localization
ACSM3	GO:0008217	regulation of blood pressure
ACSM3	GO:0046394	carboxylic acid biosynthetic process
ACSM3	GO:0008015	blood circulation
ACSM3	GO:0016053	organic acid biosynthetic process
ACSM3	GO:0003013	circulatory system process
ACSM3	GO:0006631	fatty acid metabolic process
ACSM3	GO:0006633	fatty acid biosynthetic process
ACSM3	GO:0008610	lipid biosynthetic process
ADAM33	GO:0006508	proteolysis
ADAM33	GO:0007229	integrin-mediated signaling pathway
ADAM33	GO:0007166	cell surface receptor linked signal transduction
ADAMTS13	GO:0007599	hemostasis
ADAMTS13	GO:0007229	integrin-mediated signaling pathway
ADAMTS13	GO:0050878	regulation of body fluid levels
ADAMTS13	GO:0051604	protein maturation
ADAMTS13	GO:0007596	blood coagulation
ADAMTS13	GO:0031589	cell-substrate adhesion
ADAMTS13	GO:0042060	wound healing
ADAMTS13	GO:0009611	response to wounding
ADAMTS13	GO:0009100	glycoprotein metabolic process
ADAMTS13	GO:0016485	protein processing
ADAMTS13	GO:0007160	cell-matrix adhesion
ADAMTS13	GO:0001775	cell activation
ADAMTS13	GO:0022610	biological adhesion
ADAMTS13	GO:0006508	proteolysis
ADAMTS13	GO:0050817	coagulation
ADAMTS13	GO:0030168	platelet activation
ADAMTS13	GO:0043171	peptide catabolic process
ADAMTS13	GO:0007155	cell adhesion
ADAMTS13	GO:0007166	cell surface receptor linked signal transduction
ADAMTS13	GO:0006518	peptide metabolic process
ADCY6	GO:0007194	negative regulation of adenylate cyclase activity
ADCY6	GO:0007193	inhibition of adenylate cyclase activity by G-protein signaling
ADCY6	GO:0007242	intracellular signaling cascade
ADCY6	GO:0007190	activation of adenylate cyclase activity
ADCY6	GO:0007188	G-protein signaling, coupled to cAMP nucleotide second messenger
ADCY6	GO:0006163	purine nucleotide metabolic process
ADCY6	GO:0009165	nucleotide biosynthetic process
ADCY6	GO:0007186	G-protein coupled receptor protein signaling pathway
ADCY6	GO:0006164	purine nucleotide biosynthetic process
ADCY6	GO:0009187	cyclic nucleotide metabolic process
ADCY6	GO:0007189	activation of adenylate cyclase activity by G-protein signaling pathway
ADCY6	GO:0006171	cAMP biosynthetic process
ADCY6	GO:0009123	nucleoside monophosphate metabolic process
ADCY6	GO:0033674	positive regulation of kinase activity
ADCY6	GO:0007187	G-protein signaling, coupled to cyclic nucleotide second messenger
ADCY6	GO:0007166	cell surface receptor linked signal transduction
ADCY6	GO:0051338	regulation of transferase activity
ADCY6	GO:0009124	nucleoside monophosphate biosynthetic process
ADCY6	GO:0031280	negative regulation of cyclase activity
ADCY6	GO:0006140	regulation of nucleotide metabolic process
ADCY6	GO:0043549	regulation of kinase activity
ADCY6	GO:0051350	negative regulation of lyase activity
ADCY6	GO:0051349	positive regulation of lyase activity
ADCY6	GO:0051347	positive regulation of transferase activity
ADCY6	GO:0034654	nucleobase, nucleoside, nucleotide and nucleic acid biosynthetic process
ADCY6	GO:0019932	second-messenger-mediated signaling
ADCY6	GO:0010578	regulation of adenylate cyclase activity involved in G-protein signaling
ADCY6	GO:0051339	regulation of lyase activity
ADCY6	GO:0045762	positive regulation of adenylate cyclase activity
ADCY6	GO:0045761	regulation of adenylate cyclase activity
ADCY6	GO:0051174	regulation of phosphorus metabolic process
ADCY6	GO:0031279	regulation of cyclase activity
ADCY6	GO:0044271	nitrogen compound biosynthetic process
ADCY6	GO:0030808	regulation of nucleotide biosynthetic process
ADCY6	GO:0043086	negative regulation of catalytic activity
ADCY6	GO:0042325	regulation of phosphorylation
ADCY6	GO:0045860	positive regulation of protein kinase activity
ADCY6	GO:0044093	positive regulation of molecular function
ADCY6	GO:0030799	regulation of cyclic nucleotide metabolic process
ADCY6	GO:0032870	cellular response to hormone stimulus
ADCY6	GO:0034199	activation of protein kinase A activity
ADCY6	GO:0031281	positive regulation of cyclase activity
ADCY6	GO:0032147	activation of protein kinase activity
ADCY6	GO:0044092	negative regulation of molecular function
ADCY6	GO:0034404	nucleobase, nucleoside and nucleotide biosynthetic process
ADCY6	GO:0030814	regulation of cAMP metabolic process
ADCY6	GO:0046058	cAMP metabolic process
ADCY6	GO:0009190	cyclic nucleotide biosynthetic process
ADCY6	GO:0019933	cAMP-mediated signaling
ADCY6	GO:0009725	response to hormone stimulus
ADCY6	GO:0010579	positive regulation of adenylate cyclase activity by G-protein signaling pathway
ADCY6	GO:0019220	regulation of phosphate metabolic process
ADCY6	GO:0009719	response to endogenous stimulus
ADCY6	GO:0043085	positive regulation of catalytic activity
ADCY6	GO:0010033	response to organic substance
ADCY6	GO:0009755	hormone-mediated signaling
ADCY6	GO:0019935	cyclic-nucleotide-mediated signaling
ADCY6	GO:0030802	regulation of cyclic nucleotide biosynthetic process
ADCY6	GO:0045859	regulation of protein kinase activity
ADCY6	GO:0030817	regulation of cAMP biosynthetic process
AGER	GO:0050930	induction of positive chemotaxis
AGER	GO:0050927	positive regulation of positive chemotaxis
AGER	GO:0007166	cell surface receptor linked signal transduction
AGER	GO:0048661	positive regulation of smooth muscle cell proliferation
AGER	GO:0040017	positive regulation of locomotion
AGER	GO:0007259	JAK-STAT cascade
AGER	GO:0042127	regulation of cell proliferation
AGER	GO:0006952	defense response
AGER	GO:0006954	inflammatory response
AGER	GO:0032103	positive regulation of response to external stimulus
AGER	GO:0007243	protein kinase cascade
AGER	GO:0007242	intracellular signaling cascade
AGER	GO:0032101	regulation of response to external stimulus
AGER	GO:0048520	positive regulation of behavior
AGER	GO:0050926	regulation of positive chemotaxis
AGER	GO:0009611	response to wounding
AGER	GO:0007568	aging
AGER	GO:0048660	regulation of smooth muscle cell proliferation
AGER	GO:0050920	regulation of chemotaxis
AGER	GO:0008284	positive regulation of cell proliferation
AGER	GO:0050921	positive regulation of chemotaxis
AGER	GO:0050795	regulation of behavior
AGER	GO:0048584	positive regulation of response to stimulus
AGER	GO:0040012	regulation of locomotion
AKR1A1	GO:0046395	carboxylic acid catabolic process
AKR1A1	GO:0006006	glucose metabolic process
AKR1A1	GO:0042364	water-soluble vitamin biosynthetic process
AKR1A1	GO:0016053	organic acid biosynthetic process
AKR1A1	GO:0005996	monosaccharide metabolic process
AKR1A1	GO:0046394	carboxylic acid biosynthetic process
AKR1A1	GO:0046185	aldehyde catabolic process
AKR1A1	GO:0019852	L-ascorbic acid metabolic process
AKR1A1	GO:0006081	cellular aldehyde metabolic process
AKR1A1	GO:0006064	glucuronate catabolic process
AKR1A1	GO:0009110	vitamin biosynthetic process
AKR1A1	GO:0019585	glucuronate metabolic process
AKR1A1	GO:0016052	carbohydrate catabolic process
AKR1A1	GO:0019853	L-ascorbic acid biosynthetic process
AKR1A1	GO:0006767	water-soluble vitamin metabolic process
AKR1A1	GO:0016054	organic acid catabolic process
AKR1A1	GO:0006063	uronic acid metabolic process
AKR1A1	GO:0055114	oxidation reduction
AKR1A1	GO:0042840	D-glucuronate catabolic process
AKR1A1	GO:0042839	D-glucuronate metabolic process
AKR1A1	GO:0019318	hexose metabolic process
AKR1A1	GO:0006766	vitamin metabolic process
AKR1B10	GO:0008202	steroid metabolic process
AKR1B10	GO:0055114	oxidation reduction
AKR1B10	GO:0006081	cellular aldehyde metabolic process
AKR1B10	GO:0007586	digestion
AKR7A2	GO:0055114	oxidation reduction
AKR7A2	GO:0006081	cellular aldehyde metabolic process
ALAD	GO:0033014	tetrapyrrole biosynthetic process
ALAD	GO:0044271	nitrogen compound biosynthetic process
ALAD	GO:0006783	heme biosynthetic process
ALAD	GO:0051188	cofactor biosynthetic process
ALAD	GO:0046148	pigment biosynthetic process
ALAD	GO:0033013	tetrapyrrole metabolic process
ALAD	GO:0042440	pigment metabolic process
ALAD	GO:0018130	heterocycle biosynthetic process
ALAD	GO:0042168	heme metabolic process
ALAD	GO:0006778	porphyrin metabolic process
ALAD	GO:0006779	porphyrin biosynthetic process
ALAD	GO:0051186	cofactor metabolic process
ALDH7A1	GO:0055114	oxidation reduction
ALDH7A1	GO:0050890	cognition
ALDH7A1	GO:0007605	sensory perception of sound
ALDH7A1	GO:0050877	neurological system process
ALDH7A1	GO:0007600	sensory perception
ALDH7A1	GO:0050954	sensory perception of mechanical stimulus
ALDH7A1	GO:0006081	cellular aldehyde metabolic process
ALG2	GO:0010035	response to inorganic substance
ALG2	GO:0006487	protein amino acid N-linked glycosylation
ALG2	GO:0009312	oligosaccharide biosynthetic process
ALG2	GO:0016051	carbohydrate biosynthetic process
ALG2	GO:0006488	dolichol-linked oligosaccharide biosynthetic process
ALG2	GO:0043413	biopolymer glycosylation
ALG2	GO:0033577	protein amino acid glycosylation in endoplasmic reticulum
ALG2	GO:0051592	response to calcium ion
ALG2	GO:0010038	response to metal ion
ALG2	GO:0009311	oligosaccharide metabolic process
ALG2	GO:0009101	glycoprotein biosynthetic process
ALG2	GO:0009100	glycoprotein metabolic process
ALG2	GO:0008104	protein localization
ALG2	GO:0006486	protein amino acid glycosylation
ALG2	GO:0070085	glycosylation
ALPK2	GO:0006468	protein amino acid phosphorylation
ALPK2	GO:0006793	phosphorus metabolic process
ALPK2	GO:0006796	phosphate metabolic process
ALPK2	GO:0016310	phosphorylation
AMPD3	GO:0009124	nucleoside monophosphate biosynthetic process
AMPD3	GO:0009168	purine ribonucleoside monophosphate biosynthetic process
AMPD3	GO:0044271	nitrogen compound biosynthetic process
AMPD3	GO:0009166	nucleotide catabolic process
AMPD3	GO:0009259	ribonucleotide metabolic process
AMPD3	GO:0009260	ribonucleotide biosynthetic process
AMPD3	GO:0034654	nucleobase, nucleoside, nucleotide and nucleic acid biosynthetic process
AMPD3	GO:0034655	nucleobase, nucleoside, nucleotide and nucleic acid catabolic process
AMPD3	GO:0009161	ribonucleoside monophosphate metabolic process
AMPD3	GO:0046033	AMP metabolic process
AMPD3	GO:0009158	ribonucleoside monophosphate catabolic process
AMPD3	GO:0009156	ribonucleoside monophosphate biosynthetic process
AMPD3	GO:0046700	heterocycle catabolic process
AMPD3	GO:0034404	nucleobase, nucleoside and nucleotide biosynthetic process
AMPD3	GO:0009169	purine ribonucleoside monophosphate catabolic process
AMPD3	GO:0009165	nucleotide biosynthetic process
AMPD3	GO:0009154	purine ribonucleotide catabolic process
AMPD3	GO:0009150	purine ribonucleotide metabolic process
AMPD3	GO:0006164	purine nucleotide biosynthetic process
AMPD3	GO:0009112	nucleobase metabolic process
AMPD3	GO:0009127	purine nucleoside monophosphate biosynthetic process
AMPD3	GO:0009125	nucleoside monophosphate catabolic process
AMPD3	GO:0009167	purine ribonucleoside monophosphate metabolic process
AMPD3	GO:0006163	purine nucleotide metabolic process
AMPD3	GO:0006144	purine base metabolic process
AMPD3	GO:0006196	AMP catabolic process
AMPD3	GO:0009123	nucleoside monophosphate metabolic process
AMPD3	GO:0034656	nucleobase, nucleoside and nucleotide catabolic process
AMPD3	GO:0006195	purine nucleotide catabolic process
AMPD3	GO:0009128	purine nucleoside monophosphate catabolic process
AMPD3	GO:0009126	purine nucleoside monophosphate metabolic process
AMPD3	GO:0009261	ribonucleotide catabolic process
AMPD3	GO:0009152	purine ribonucleotide biosynthetic process
AMPD3	GO:0044270	nitrogen compound catabolic process
AMTN	GO:0042475	odontogenesis of dentine-containing tooth
AMTN	GO:0031214	biomineral formation
AMTN	GO:0007155	cell adhesion
AMTN	GO:0042476	odontogenesis
AMTN	GO:0022610	biological adhesion
ANK1	GO:0046903	secretion
ANK1	GO:0045197	establishment or maintenance of epithelial cell apical/basal polarity
ANK1	GO:0007163	establishment or maintenance of cell polarity
ANK1	GO:0045199	maintenance of epithelial cell apical/basal polarity
ANK1	GO:0000902	cell morphogenesis
ANK1	GO:0035090	maintenance of apical/basal cell polarity
ANK1	GO:0007010	cytoskeleton organization
ANK1	GO:0006887	exocytosis
ANK1	GO:0032989	cellular component morphogenesis
ANK1	GO:0016192	vesicle-mediated transport
ANK1	GO:0035088	establishment or maintenance of apical/basal cell polarity
ANK1	GO:0032940	secretion by cell
ANK1	GO:0030011	maintenance of cell polarity
ANO10	GO:0006811	ion transport
AOC3	GO:0007155	cell adhesion
AOC3	GO:0006952	defense response
AOC3	GO:0006954	inflammatory response
AOC3	GO:0055114	oxidation reduction
AOC3	GO:0022610	biological adhesion
AOC3	GO:0009611	response to wounding
AP3B1	GO:0016044	membrane organization
AP3B1	GO:0019882	antigen processing and presentation
AP3B1	GO:0045580	regulation of T cell differentiation
AP3B1	GO:0051251	positive regulation of lymphocyte activation
AP3B1	GO:0002684	positive regulation of immune system process
AP3B1	GO:0016192	vesicle-mediated transport
AP3B1	GO:0046637	regulation of alpha-beta T cell differentiation
AP3B1	GO:0015031	protein transport
AP3B1	GO:0045597	positive regulation of cell differentiation
AP3B1	GO:0034613	cellular protein localization
AP3B1	GO:0050865	regulation of cell activation
AP3B1	GO:0050870	positive regulation of T cell activation
AP3B1	GO:0051136	regulation of NK T cell differentiation
AP3B1	GO:0048003	antigen processing and presentation of lipid antigen via MHC class Ib
AP3B1	GO:0050867	positive regulation of cell activation
AP3B1	GO:0050817	coagulation
AP3B1	GO:0046638	positive regulation of alpha-beta T cell differentiation
AP3B1	GO:0007599	hemostasis
AP3B1	GO:0010324	membrane invagination
AP3B1	GO:0045621	positive regulation of lymphocyte differentiation
AP3B1	GO:0008104	protein localization
AP3B1	GO:0051138	positive regulation of NK T cell differentiation
AP3B1	GO:0009611	response to wounding
AP3B1	GO:0046907	intracellular transport
AP3B1	GO:0045619	regulation of lymphocyte differentiation
AP3B1	GO:0050878	regulation of body fluid levels
AP3B1	GO:0050863	regulation of T cell activation
AP3B1	GO:0048007	antigen processing and presentation, exogenous lipid antigen via MHC class Ib
AP3B1	GO:0045184	establishment of protein localization
AP3B1	GO:0042060	wound healing
AP3B1	GO:0002694	regulation of leukocyte activation
AP3B1	GO:0051094	positive regulation of developmental process
AP3B1	GO:0019884	antigen processing and presentation of exogenous antigen
AP3B1	GO:0051249	regulation of lymphocyte activation
AP3B1	GO:0007596	blood coagulation
AP3B1	GO:0006886	intracellular protein transport
AP3B1	GO:0046635	positive regulation of alpha-beta T cell activation
AP3B1	GO:0070727	cellular macromolecule localization
AP3B1	GO:0007034	vacuolar transport
AP3B1	GO:0007041	lysosomal transport
AP3B1	GO:0006623	protein targeting to vacuole
AP3B1	GO:0006622	protein targeting to lysosome
AP3B1	GO:0002475	antigen processing and presentation via MHC class Ib
AP3B1	GO:0006605	protein targeting
AP3B1	GO:0006897	endocytosis
AP3B1	GO:0045582	positive regulation of T cell differentiation
AP3B1	GO:0046634	regulation of alpha-beta T cell activation
AP3B1	GO:0002696	positive regulation of leukocyte activation
APOA5	GO:0010902	positive regulation of very-low-density lipoprotein particle remodeling
APOA5	GO:0055090	acylglycerol homeostasis
APOA5	GO:0055088	lipid homeostasis
APOA5	GO:0051004	regulation of lipoprotein lipase activity
APOA5	GO:0060193	positive regulation of lipase activity
APOA5	GO:0051050	positive regulation of transport
APOA5	GO:0042592	homeostatic process
APOA5	GO:0042304	regulation of fatty acid biosynthetic process
APOA5	GO:0046503	glycerolipid catabolic process
APOA5	GO:0045723	positive regulation of fatty acid biosynthetic process
APOA5	GO:0048878	chemical homeostasis
APOA5	GO:0046890	regulation of lipid biosynthetic process
APOA5	GO:0044242	cellular lipid catabolic process
APOA5	GO:0044269	glycerol ether catabolic process
APOA5	GO:0051130	positive regulation of cellular component organization
APOA5	GO:0046464	acylglycerol catabolic process
APOA5	GO:0045834	positive regulation of lipid metabolic process
APOA5	GO:0045923	positive regulation of fatty acid metabolic process
APOA5	GO:0045807	positive regulation of endocytosis
APOA5	GO:0046486	glycerolipid metabolic process
APOA5	GO:0043085	positive regulation of catalytic activity
APOA5	GO:0046889	positive regulation of lipid biosynthetic process
APOA5	GO:0044093	positive regulation of molecular function
APOA5	GO:0043933	macromolecular complex subunit organization
APOA5	GO:0048259	regulation of receptor-mediated endocytosis
APOA5	GO:0048260	positive regulation of receptor-mediated endocytosis
APOA5	GO:0070328	triglyceride homeostasis
APOA5	GO:0051336	regulation of hydrolase activity
APOA5	GO:0051006	positive regulation of lipoprotein lipase activity
APOA5	GO:0040007	growth
APOA5	GO:0050994	regulation of lipid catabolic process
APOA5	GO:0060627	regulation of vesicle-mediated transport
APOA5	GO:0034369	plasma lipoprotein particle remodeling
APOA5	GO:0051345	positive regulation of hydrolase activity
APOA5	GO:0034370	triglyceride-rich lipoprotein particle remodeling
APOA5	GO:0042060	wound healing
APOA5	GO:0031331	positive regulation of cellular catabolic process
APOA5	GO:0048589	developmental growth
APOA5	GO:0034368	protein-lipid complex remodeling
APOA5	GO:0042157	lipoprotein metabolic process
APOA5	GO:0031099	regeneration
APOA5	GO:0031329	regulation of cellular catabolic process
APOA5	GO:0050996	positive regulation of lipid catabolic process
APOA5	GO:0019433	triglyceride catabolic process
APOA5	GO:0016042	lipid catabolic process
APOA5	GO:0031328	positive regulation of cellular biosynthetic process
APOA5	GO:0019216	regulation of lipid metabolic process
APOA5	GO:0009894	regulation of catabolic process
APOA5	GO:0046461	neutral lipid catabolic process
APOA5	GO:0009896	positive regulation of catabolic process
APOA5	GO:0010876	lipid localization
APOA5	GO:0010896	regulation of triglyceride catabolic process
APOA5	GO:0006869	lipid transport
APOA5	GO:0042246	tissue regeneration
APOA5	GO:0006638	neutral lipid metabolic process
APOA5	GO:0006641	triglyceride metabolic process
APOA5	GO:0006662	glycerol ether metabolic process
APOA5	GO:0010898	positive regulation of triglyceride catabolic process
APOA5	GO:0009611	response to wounding
APOA5	GO:0060191	regulation of lipase activity
APOA5	GO:0006639	acylglycerol metabolic process
APOA5	GO:0009891	positive regulation of biosynthetic process
APOA5	GO:0010565	regulation of cellular ketone metabolic process
APOA5	GO:0019217	regulation of fatty acid metabolic process
APOA5	GO:0030100	regulation of endocytosis
APOA5	GO:0018904	organic ether metabolic process
APOA5	GO:0010901	regulation of very-low-density lipoprotein particle remodeling
APOA5	GO:0034367	macromolecular complex remodeling
APOH	GO:0060548	negative regulation of cell death
APOH	GO:0051917	regulation of fibrinolysis
APOH	GO:0050818	regulation of coagulation
APOH	GO:0044093	positive regulation of molecular function
APOH	GO:0043067	regulation of programmed cell death
APOH	GO:0050820	positive regulation of coagulation
APOH	GO:0043085	positive regulation of catalytic activity
APOH	GO:0045765	regulation of angiogenesis
APOH	GO:0043069	negative regulation of programmed cell death
APOH	GO:0051006	positive regulation of lipoprotein lipase activity
APOH	GO:0051240	positive regulation of multicellular organismal process
APOH	GO:0051004	regulation of lipoprotein lipase activity
APOH	GO:0051271	negative regulation of cell motion
APOH	GO:0051336	regulation of hydrolase activity
APOH	GO:0051345	positive regulation of hydrolase activity
APOH	GO:0043066	negative regulation of apoptosis
APOH	GO:0051605	protein maturation by peptide bond cleavage
APOH	GO:0050878	regulation of body fluid levels
APOH	GO:0042127	regulation of cell proliferation
APOH	GO:0051604	protein maturation
APOH	GO:0042981	regulation of apoptosis
APOH	GO:0042060	wound healing
APOH	GO:0009611	response to wounding
APOH	GO:0040012	regulation of locomotion
APOH	GO:0040013	negative regulation of locomotion
APOH	GO:0034197	triglyceride transport
APOH	GO:0034392	negative regulation of smooth muscle cell apoptosis
APOH	GO:0034391	regulation of smooth muscle cell apoptosis
APOH	GO:0033033	negative regulation of myeloid cell apoptosis
APOH	GO:0001936	regulation of endothelial cell proliferation
APOH	GO:0010941	regulation of cell death
APOH	GO:0031638	zymogen activation
APOH	GO:0031100	organ regeneration
APOH	GO:0032101	regulation of response to external stimulus
APOH	GO:0016485	protein processing
APOH	GO:0030195	negative regulation of blood coagulation
APOH	GO:0016525	negative regulation of angiogenesis
APOH	GO:0030336	negative regulation of cell migration
APOH	GO:0030193	regulation of blood coagulation
APOH	GO:0031099	regeneration
APOH	GO:0033032	regulation of myeloid cell apoptosis
APOH	GO:0010660	regulation of muscle cell apoptosis
APOH	GO:0007597	blood coagulation, intrinsic pathway
APOH	GO:0034196	acylglycerol transport
APOH	GO:0030334	regulation of cell migration
APOH	GO:0018904	organic ether metabolic process
APOH	GO:0030194	positive regulation of blood coagulation
APOH	GO:0010596	negative regulation of endothelial cell migration
APOH	GO:0060191	regulation of lipase activity
APOH	GO:0060193	positive regulation of lipase activity
APOH	GO:0050819	negative regulation of coagulation
APOH	GO:0046486	glycerolipid metabolic process
APOH	GO:0051241	negative regulation of multicellular organismal process
APOH	GO:0051270	regulation of cell motion
APOH	GO:0010656	negative regulation of muscle cell apoptosis
APOH	GO:0007599	hemostasis
APOH	GO:0010876	lipid localization
APOH	GO:0050817	coagulation
APOH	GO:0051918	negative regulation of fibrinolysis
APOH	GO:0008285	negative regulation of cell proliferation
APOH	GO:0010594	regulation of endothelial cell migration
APOH	GO:0007596	blood coagulation
APOH	GO:0006639	acylglycerol metabolic process
APOH	GO:0006869	lipid transport
APOH	GO:0006508	proteolysis
APOH	GO:0006662	glycerol ether metabolic process
APOH	GO:0001937	negative regulation of endothelial cell proliferation
APOH	GO:0006641	triglyceride metabolic process
APOH	GO:0006638	neutral lipid metabolic process
APOH	GO:0031639	plasminogen activation
ARHGAP10	GO:0007010	cytoskeleton organization
ARHGEF10	GO:0046578	regulation of Ras protein signal transduction
ARHGEF10	GO:0035023	regulation of Rho protein signal transduction
ARHGEF10	GO:0051056	regulation of small GTPase mediated signal transduction
ARHGEF10L	GO:0006355	regulation of transcription, DNA-dependent
ARHGEF10L	GO:0006984	ER-nuclear signaling pathway
ARHGEF10L	GO:0006357	regulation of transcription from RNA polymerase II promoter
ARHGEF10L	GO:0035023	regulation of Rho protein signal transduction
ARHGEF10L	GO:0051492	regulation of stress fiber formation
ARHGEF10L	GO:0051254	positive regulation of RNA metabolic process
ARHGEF10L	GO:0051496	positive regulation of stress fiber formation
ARHGEF10L	GO:0046578	regulation of Ras protein signal transduction
ARHGEF10L	GO:0051130	positive regulation of cellular component organization
ARHGEF10L	GO:0051252	regulation of RNA metabolic process
ARHGEF10L	GO:0051173	positive regulation of nitrogen compound metabolic process
ARHGEF10L	GO:0051495	positive regulation of cytoskeleton organization
ARHGEF10L	GO:0051493	regulation of cytoskeleton organization
ARHGEF10L	GO:0044087	regulation of cellular component biogenesis
ARHGEF10L	GO:0045893	positive regulation of transcription, DNA-dependent
ARHGEF10L	GO:0032970	regulation of actin filament-based process
ARHGEF10L	GO:0043193	positive regulation of gene-specific transcription
ARHGEF10L	GO:0010638	positive regulation of organelle organization
ARHGEF10L	GO:0032583	regulation of gene-specific transcription
ARHGEF10L	GO:0032933	SREBP-mediated signaling pathway
ARHGEF10L	GO:0031328	positive regulation of cellular biosynthetic process
ARHGEF10L	GO:0033043	regulation of organelle organization
ARHGEF10L	GO:0051056	regulation of small GTPase mediated signal transduction
ARHGEF10L	GO:0035104	positive regulation of transcription via sterol regulatory element binding
ARHGEF10L	GO:0045449	regulation of transcription
ARHGEF10L	GO:0032233	positive regulation of actin filament bundle formation
ARHGEF10L	GO:0045941	positive regulation of transcription
ARHGEF10L	GO:0032956	regulation of actin cytoskeleton organization
ARHGEF10L	GO:0010628	positive regulation of gene expression
ARHGEF10L	GO:0032231	regulation of actin filament bundle formation
ARHGEF10L	GO:0045944	positive regulation of transcription from RNA polymerase II promoter
ARHGEF10L	GO:0009891	positive regulation of biosynthetic process
ARHGEF10L	GO:0010557	positive regulation of macromolecule biosynthetic process
ARHGEF10L	GO:0010551	regulation of specific transcription from RNA polymerase II promoter
ARHGEF10L	GO:0045935	positive regulation of nucleobase, nucleoside, nucleotide and nucleic acid metabolic process
ARHGEF10L	GO:0010604	positive regulation of macromolecule metabolic process
ARHGEF10L	GO:0010552	positive regulation of specific transcription from RNA polymerase II promoter
ARHGEF12	GO:0043068	positive regulation of programmed cell death
ARHGEF12	GO:0012502	induction of programmed cell death
ARHGEF12	GO:0035023	regulation of Rho protein signal transduction
ARHGEF12	GO:0010942	positive regulation of cell death
ARHGEF12	GO:0043065	positive regulation of apoptosis
ARHGEF12	GO:0008624	induction of apoptosis by extracellular signals
ARHGEF12	GO:0010941	regulation of cell death
ARHGEF12	GO:0012501	programmed cell death
ARHGEF12	GO:0051056	regulation of small GTPase mediated signal transduction
ARHGEF12	GO:0042981	regulation of apoptosis
ARHGEF12	GO:0007242	intracellular signaling cascade
ARHGEF12	GO:0043067	regulation of programmed cell death
ARHGEF12	GO:0046578	regulation of Ras protein signal transduction
ARHGEF12	GO:0008219	cell death
ARHGEF12	GO:0006917	induction of apoptosis
ARHGEF12	GO:0016265	death
ARHGEF12	GO:0007186	G-protein coupled receptor protein signaling pathway
ARHGEF12	GO:0007166	cell surface receptor linked signal transduction
ARHGEF12	GO:0006915	apoptosis
ARHGEF38	GO:0046578	regulation of Ras protein signal transduction
ARHGEF38	GO:0035023	regulation of Rho protein signal transduction
ARHGEF38	GO:0051056	regulation of small GTPase mediated signal transduction
ARHGEF40	GO:0046578	regulation of Ras protein signal transduction
ARHGEF40	GO:0035023	regulation of Rho protein signal transduction
ARHGEF40	GO:0051056	regulation of small GTPase mediated signal transduction
ARID4A	GO:0006355	regulation of transcription, DNA-dependent
ARID4A	GO:0006325	chromatin organization
ARID4A	GO:0016481	negative regulation of transcription
ARID4A	GO:0051276	chromosome organization
ARID4A	GO:0045892	negative regulation of transcription, DNA-dependent
ARID4A	GO:0032774	RNA biosynthetic process
ARID4A	GO:0031327	negative regulation of cellular biosynthetic process
ARID4A	GO:0010605	negative regulation of macromolecule metabolic process
ARID4A	GO:0009890	negative regulation of biosynthetic process
ARID4A	GO:0045934	negative regulation of nucleobase, nucleoside, nucleotide and nucleic acid metabolic process
ARID4A	GO:0045449	regulation of transcription
ARID4A	GO:0010629	negative regulation of gene expression
ARID4A	GO:0006333	chromatin assembly or disassembly
ARID4A	GO:0051252	regulation of RNA metabolic process
ARID4A	GO:0051172	negative regulation of nitrogen compound metabolic process
ARID4A	GO:0051253	negative regulation of RNA metabolic process
ARID4A	GO:0006350	transcription
ARID4A	GO:0006351	transcription, DNA-dependent
ARID4A	GO:0006366	transcription from RNA polymerase II promoter
ARID4A	GO:0010558	negative regulation of macromolecule biosynthetic process
ARSA	GO:0019953	sexual reproduction
ARSA	GO:0045471	response to ethanol
ARSA	GO:0031667	response to nutrient levels
ARSA	GO:0048545	response to steroid hormone stimulus
ARSA	GO:0010033	response to organic substance
ARSA	GO:0009991	response to extracellular stimulus
ARSA	GO:0009725	response to hormone stimulus
ARSA	GO:0007339	binding of sperm to zona pellucida
ARSA	GO:0009719	response to endogenous stimulus
ARSA	GO:0007338	single fertilization
ARSA	GO:0009628	response to abiotic stimulus
ARSA	GO:0008037	cell recognition
ARSA	GO:0007584	response to nutrient
ARSA	GO:0009566	fertilization
ARSA	GO:0009988	cell-cell recognition
ARSA	GO:0043627	response to estrogen stimulus
ARSA	GO:0006914	autophagy
ARSA	GO:0035036	sperm-egg recognition
ARSA	GO:0051597	response to methylmercury
ARSA	GO:0048610	reproductive cellular process
ARSA	GO:0009268	response to pH
ASCC2	GO:0006350	transcription
ASCC2	GO:0045449	regulation of transcription
ASPM	GO:0045769	negative regulation of asymmetric cell division
ASPM	GO:0051960	regulation of nervous system development
ASPM	GO:0051651	maintenance of location in cell
ASPM	GO:0060284	regulation of cell development
ASPM	GO:0051661	maintenance of centrosome location
ASPM	GO:0055057	neuroblast division
ASPM	GO:0051657	maintenance of organelle location
ASPM	GO:0051782	negative regulation of cell division
ASPM	GO:0051640	organelle localization
ASPM	GO:0021873	forebrain neuroblast division
ASPM	GO:0051301	cell division
ASPM	GO:0051302	regulation of cell division
ASPM	GO:0051235	maintenance of location
ASPM	GO:0050767	regulation of neurogenesis
ASPM	GO:0051642	centrosome localization
ASPM	GO:0030900	forebrain development
ASPM	GO:0008283	cell proliferation
ASPM	GO:0048103	somatic stem cell division
ASPM	GO:0022403	cell cycle phase
ASPM	GO:0048285	organelle fission
ASPM	GO:0022402	cell cycle process
ASPM	GO:0021872	generation of neurons in the forebrain
ASPM	GO:0045596	negative regulation of cell differentiation
ASPM	GO:0045665	negative regulation of neuron differentiation
ASPM	GO:0045664	regulation of neuron differentiation
ASPM	GO:0009786	regulation of asymmetric cell division
ASPM	GO:0000280	nuclear division
ASPM	GO:0007067	mitosis
ASPM	GO:0007049	cell cycle
ASPM	GO:0000279	M phase
ASPM	GO:0017145	stem cell division
ASPM	GO:0000278	mitotic cell cycle
ASPM	GO:0007405	neuroblast proliferation
ASPM	GO:0000087	M phase of mitotic cell cycle
ASTN1	GO:0051674	localization of cell
ASTN1	GO:0007626	locomotory behavior
ASTN1	GO:0022610	biological adhesion
ASTN1	GO:0016477	cell migration
ASTN1	GO:0048870	cell motility
ASTN1	GO:0006928	cell motion
ASTN1	GO:0007158	neuron adhesion
ASTN1	GO:0007155	cell adhesion
ASTN1	GO:0007610	behavior
ASTN1	GO:0016337	cell-cell adhesion
ASZ1	GO:0008285	negative regulation of cell proliferation
ASZ1	GO:0010033	response to organic substance
ASZ1	GO:0009725	response to hormone stimulus
ASZ1	GO:0008015	blood circulation
ASZ1	GO:0019226	transmission of nerve impulse
ASZ1	GO:0070507	regulation of microtubule cytoskeleton organization
ASZ1	GO:0031109	microtubule polymerization or depolymerization
ASZ1	GO:0031116	positive regulation of microtubule polymerization
ASZ1	GO:0031334	positive regulation of protein complex assembly
ASZ1	GO:0006461	protein complex assembly
ASZ1	GO:0033043	regulation of organelle organization
ASZ1	GO:0051495	positive regulation of cytoskeleton organization
ASZ1	GO:0051674	localization of cell
ASZ1	GO:0050880	regulation of blood vessel size
ASZ1	GO:0050877	neurological system process
ASZ1	GO:0048732	gland development
ASZ1	GO:0048609	reproductive process in a multicellular organism
ASZ1	GO:0046785	microtubule polymerization
ASZ1	GO:0046777	protein amino acid autophosphorylation
ASZ1	GO:0043627	response to estrogen stimulus
ASZ1	GO:0048870	cell motility
ASZ1	GO:0044087	regulation of cellular component biogenesis
ASZ1	GO:0043434	response to peptide hormone stimulus
ASZ1	GO:0043254	regulation of protein complex assembly
ASZ1	GO:0042311	vasodilation
ASZ1	GO:0042127	regulation of cell proliferation
ASZ1	GO:0060541	respiratory system development
ASZ1	GO:0035150	regulation of tube size
ASZ1	GO:0034622	cellular macromolecular complex assembly
ASZ1	GO:0034621	cellular macromolecular complex subunit organization
ASZ1	GO:0042493	response to drug
ASZ1	GO:0032886	regulation of microtubule-based process
ASZ1	GO:0032504	multicellular organism reproduction
ASZ1	GO:0070633	transepithelial transport
ASZ1	GO:0030323	respiratory tube development
ASZ1	GO:0032271	regulation of protein polymerization
ASZ1	GO:0031113	regulation of microtubule polymerization
ASZ1	GO:0006793	phosphorus metabolic process
ASZ1	GO:0031112	positive regulation of microtubule polymerization or depolymerization
ASZ1	GO:0006811	ion transport
ASZ1	GO:0051258	protein polymerization
ASZ1	GO:0051493	regulation of cytoskeleton organization
ASZ1	GO:0031110	regulation of microtubule polymerization or depolymerization
ASZ1	GO:0006820	anion transport
ASZ1	GO:0051130	positive regulation of cellular component organization
ASZ1	GO:0048545	response to steroid hormone stimulus
ASZ1	GO:0043623	cellular protein complex assembly
ASZ1	GO:0043933	macromolecular complex subunit organization
ASZ1	GO:0030324	lung development
ASZ1	GO:0006821	chloride transport
ASZ1	GO:0030879	mammary gland development
ASZ1	GO:0030317	sperm motility
ASZ1	GO:0007267	cell-cell signaling
ASZ1	GO:0016477	cell migration
ASZ1	GO:0016310	phosphorylation
ASZ1	GO:0007595	lactation
ASZ1	GO:0010638	positive regulation of organelle organization
ASZ1	GO:0015698	inorganic anion transport
ASZ1	GO:0009719	response to endogenous stimulus
ASZ1	GO:0035295	tube development
ASZ1	GO:0007268	synaptic transmission
ASZ1	GO:0030321	transepithelial chloride transport
ASZ1	GO:0007017	microtubule-based process
ASZ1	GO:0007010	cytoskeleton organization
ASZ1	GO:0070271	protein complex biogenesis
ASZ1	GO:0006928	cell motion
ASZ1	GO:0006796	phosphate metabolic process
ASZ1	GO:0001764	neuron migration
ASZ1	GO:0001936	regulation of endothelial cell proliferation
ASZ1	GO:0000226	microtubule cytoskeleton organization
ASZ1	GO:0032273	positive regulation of protein polymerization
ASZ1	GO:0001937	negative regulation of endothelial cell proliferation
ASZ1	GO:0003013	circulatory system process
ASZ1	GO:0003018	vascular process in circulatory system
ASZ1	GO:0065003	macromolecular complex assembly
ASZ1	GO:0006468	protein amino acid phosphorylation
ATG9A	GO:0031668	cellular response to extracellular stimulus
ATG9A	GO:0015031	protein transport
ATG9A	GO:0000045	autophagic vacuole formation
ATG9A	GO:0006914	autophagy
ATG9A	GO:0009991	response to extracellular stimulus
ATG9A	GO:0008104	protein localization
ATG9A	GO:0009267	cellular response to starvation
ATG9A	GO:0031667	response to nutrient levels
ATG9A	GO:0007033	vacuole organization
ATG9A	GO:0016236	macroautophagy
ATG9A	GO:0045184	establishment of protein localization
ATG9A	GO:0031669	cellular response to nutrient levels
ATG9A	GO:0033554	stress response
ATG9A	GO:0042594	response to starvation
ATMIN	GO:0033554	stress response
ATMIN	GO:0006974	DNA damage response
ATP10A	GO:0046034	ATP metabolic process
ATP10A	GO:0015914	phospholipid transport
ATP10A	GO:0044271	nitrogen compound biosynthetic process
ATP10A	GO:0034654	nucleobase, nucleoside, nucleotide and nucleic acid biosynthetic process
ATP10A	GO:0034404	nucleobase, nucleoside and nucleotide biosynthetic process
ATP10A	GO:0010876	lipid localization
ATP10A	GO:0009260	ribonucleotide biosynthetic process
ATP10A	GO:0022604	regulation of cell morphogenesis
ATP10A	GO:0009206	purine ribonucleoside triphosphate biosynthetic process
ATP10A	GO:0009205	purine ribonucleoside triphosphate metabolic process
ATP10A	GO:0009201	ribonucleoside triphosphate biosynthetic process
ATP10A	GO:0009150	purine ribonucleotide metabolic process
ATP10A	GO:0006164	purine nucleotide biosynthetic process
ATP10A	GO:0009142	nucleoside triphosphate biosynthetic process
ATP10A	GO:0006163	purine nucleotide metabolic process
ATP10A	GO:0009141	nucleoside triphosphate metabolic process
ATP10A	GO:0006754	ATP biosynthetic process
ATP10A	GO:0006869	lipid transport
ATP10A	GO:0008360	regulation of cell shape
ATP10A	GO:0009152	purine ribonucleotide biosynthetic process
ATP10A	GO:0009144	purine nucleoside triphosphate metabolic process
ATP10A	GO:0009165	nucleotide biosynthetic process
ATP10A	GO:0009199	ribonucleoside triphosphate metabolic process
ATP10A	GO:0009259	ribonucleotide metabolic process
ATP10A	GO:0009145	purine nucleoside triphosphate biosynthetic process
ATP10D	GO:0009260	ribonucleotide biosynthetic process
ATP10D	GO:0046034	ATP metabolic process
ATP10D	GO:0034654	nucleobase, nucleoside, nucleotide and nucleic acid biosynthetic process
ATP10D	GO:0034404	nucleobase, nucleoside and nucleotide biosynthetic process
ATP10D	GO:0015914	phospholipid transport
ATP10D	GO:0010876	lipid localization
ATP10D	GO:0009259	ribonucleotide metabolic process
ATP10D	GO:0009206	purine ribonucleoside triphosphate biosynthetic process
ATP10D	GO:0009201	ribonucleoside triphosphate biosynthetic process
ATP10D	GO:0009165	nucleotide biosynthetic process
ATP10D	GO:0009205	purine ribonucleoside triphosphate metabolic process
ATP10D	GO:0009152	purine ribonucleotide biosynthetic process
ATP10D	GO:0009199	ribonucleoside triphosphate metabolic process
ATP10D	GO:0009145	purine nucleoside triphosphate biosynthetic process
ATP10D	GO:0009144	purine nucleoside triphosphate metabolic process
ATP10D	GO:0009150	purine ribonucleotide metabolic process
ATP10D	GO:0044271	nitrogen compound biosynthetic process
ATP10D	GO:0009141	nucleoside triphosphate metabolic process
ATP10D	GO:0006869	lipid transport
ATP10D	GO:0006812	cation transport
ATP10D	GO:0006811	ion transport
ATP10D	GO:0006754	ATP biosynthetic process
ATP10D	GO:0006164	purine nucleotide biosynthetic process
ATP10D	GO:0009142	nucleoside triphosphate biosynthetic process
ATP10D	GO:0006163	purine nucleotide metabolic process
ATP13A2	GO:0009205	purine ribonucleoside triphosphate metabolic process
ATP13A2	GO:0006163	purine nucleotide metabolic process
ATP13A2	GO:0009142	nucleoside triphosphate biosynthetic process
ATP13A2	GO:0009144	purine nucleoside triphosphate metabolic process
ATP13A2	GO:0009150	purine ribonucleotide metabolic process
ATP13A2	GO:0009259	ribonucleotide metabolic process
ATP13A2	GO:0009260	ribonucleotide biosynthetic process
ATP13A2	GO:0006812	cation transport
ATP13A2	GO:0044271	nitrogen compound biosynthetic process
ATP13A2	GO:0034404	nucleobase, nucleoside and nucleotide biosynthetic process
ATP13A2	GO:0046034	ATP metabolic process
ATP13A2	GO:0034654	nucleobase, nucleoside, nucleotide and nucleic acid biosynthetic process
ATP13A2	GO:0006811	ion transport
ATP13A2	GO:0009199	ribonucleoside triphosphate metabolic process
ATP13A2	GO:0009206	purine ribonucleoside triphosphate biosynthetic process
ATP13A2	GO:0009145	purine nucleoside triphosphate biosynthetic process
ATP13A2	GO:0009201	ribonucleoside triphosphate biosynthetic process
ATP13A2	GO:0009152	purine ribonucleotide biosynthetic process
ATP13A2	GO:0009165	nucleotide biosynthetic process
ATP13A2	GO:0009141	nucleoside triphosphate metabolic process
ATP13A2	GO:0006164	purine nucleotide biosynthetic process
ATP13A2	GO:0006754	ATP biosynthetic process
ATP2C2	GO:0046034	ATP metabolic process
ATP2C2	GO:0034654	nucleobase, nucleoside, nucleotide and nucleic acid biosynthetic process
ATP2C2	GO:0009260	ribonucleotide biosynthetic process
ATP2C2	GO:0030001	metal ion transport
ATP2C2	GO:0015674	di-, tri-valent inorganic cation transport
ATP2C2	GO:0009205	purine ribonucleoside triphosphate metabolic process
ATP2C2	GO:0009201	ribonucleoside triphosphate biosynthetic process
ATP2C2	GO:0009152	purine ribonucleotide biosynthetic process
ATP2C2	GO:0009165	nucleotide biosynthetic process
ATP2C2	GO:0009199	ribonucleoside triphosphate metabolic process
ATP2C2	GO:0009145	purine nucleoside triphosphate biosynthetic process
ATP2C2	GO:0009259	ribonucleotide metabolic process
ATP2C2	GO:0009142	nucleoside triphosphate biosynthetic process
ATP2C2	GO:0009141	nucleoside triphosphate metabolic process
ATP2C2	GO:0006816	calcium ion transport
ATP2C2	GO:0006811	ion transport
ATP2C2	GO:0006754	ATP biosynthetic process
ATP2C2	GO:0009144	purine nucleoside triphosphate metabolic process
ATP2C2	GO:0006163	purine nucleotide metabolic process
ATP2C2	GO:0006164	purine nucleotide biosynthetic process
ATP2C2	GO:0006812	cation transport
ATP2C2	GO:0009150	purine ribonucleotide metabolic process
ATP2C2	GO:0009206	purine ribonucleoside triphosphate biosynthetic process
ATP2C2	GO:0034404	nucleobase, nucleoside and nucleotide biosynthetic process
ATP2C2	GO:0044271	nitrogen compound biosynthetic process
ATP8B3	GO:0045332	phospholipid translocation
ATP8B3	GO:0048610	reproductive cellular process
ATP8B3	GO:0046034	ATP metabolic process
ATP8B3	GO:0034404	nucleobase, nucleoside and nucleotide biosynthetic process
ATP8B3	GO:0034654	nucleobase, nucleoside, nucleotide and nucleic acid biosynthetic process
ATP8B3	GO:0034204	lipid translocation
ATP8B3	GO:0019953	sexual reproduction
ATP8B3	GO:0016044	membrane organization
ATP8B3	GO:0010876	lipid localization
ATP8B3	GO:0009566	fertilization
ATP8B3	GO:0035036	sperm-egg recognition
ATP8B3	GO:0009206	purine ribonucleoside triphosphate biosynthetic process
ATP8B3	GO:0009205	purine ribonucleoside triphosphate metabolic process
ATP8B3	GO:0009988	cell-cell recognition
ATP8B3	GO:0015914	phospholipid transport
ATP8B3	GO:0009201	ribonucleoside triphosphate biosynthetic process
ATP8B3	GO:0009150	purine ribonucleotide metabolic process
ATP8B3	GO:0009260	ribonucleotide biosynthetic process
ATP8B3	GO:0009165	nucleotide biosynthetic process
ATP8B3	GO:0009152	purine ribonucleotide biosynthetic process
ATP8B3	GO:0009145	purine nucleoside triphosphate biosynthetic process
ATP8B3	GO:0009259	ribonucleotide metabolic process
ATP8B3	GO:0009144	purine nucleoside triphosphate metabolic process
ATP8B3	GO:0009142	nucleoside triphosphate biosynthetic process
ATP8B3	GO:0044271	nitrogen compound biosynthetic process
ATP8B3	GO:0007338	single fertilization
ATP8B3	GO:0006869	lipid transport
ATP8B3	GO:0006164	purine nucleotide biosynthetic process
ATP8B3	GO:0006163	purine nucleotide metabolic process
ATP8B3	GO:0009141	nucleoside triphosphate metabolic process
ATP8B3	GO:0009199	ribonucleoside triphosphate metabolic process
ATP8B3	GO:0007339	binding of sperm to zona pellucida
ATP8B3	GO:0008037	cell recognition
ATP8B3	GO:0006754	ATP biosynthetic process
AVPR1B	GO:0060191	regulation of lipase activity
AVPR1B	GO:0060193	positive regulation of lipase activity
AVPR1B	GO:0060341	regulation of cellular localization
AVPR1B	GO:0055074	calcium ion homeostasis
AVPR1B	GO:0051336	regulation of hydrolase activity
AVPR1B	GO:0051047	positive regulation of secretion
AVPR1B	GO:0051345	positive regulation of hydrolase activity
AVPR1B	GO:0051240	positive regulation of multicellular organismal process
AVPR1B	GO:0055065	metal ion homeostasis
AVPR1B	GO:0050886	endocrine process
AVPR1B	GO:0032849	positive regulation of cellular pH reduction
AVPR1B	GO:0051046	regulation of secretion
AVPR1B	GO:0044057	regulation of system process
AVPR1B	GO:0044093	positive regulation of molecular function
AVPR1B	GO:0045823	positive regulation of heart contraction
AVPR1B	GO:0048878	chemical homeostasis
AVPR1B	GO:0045777	positive regulation of blood pressure
AVPR1B	GO:0042538	hyperosmotic salinity response
AVPR1B	GO:0032846	positive regulation of homeostatic process
AVPR1B	GO:0032844	regulation of homeostatic process
AVPR1B	GO:0051050	positive regulation of transport
AVPR1B	GO:0030005	cellular di-, tri-valent inorganic cation homeostasis
AVPR1B	GO:0030003	cellular cation homeostasis
AVPR1B	GO:0032847	regulation of cellular pH reduction
AVPR1B	GO:0042592	homeostatic process
AVPR1B	GO:0051480	cytosolic calcium ion homeostasis
AVPR1B	GO:0019725	cellular homeostasis
AVPR1B	GO:0043085	positive regulation of catalytic activity
AVPR1B	GO:0050801	ion homeostasis
AVPR1B	GO:0014048	regulation of glutamate secretion
AVPR1B	GO:0010863	positive regulation of phospholipase C activity
AVPR1B	GO:0014049	positive regulation of glutamate secretion
AVPR1B	GO:0010518	positive regulation of phospholipase activity
AVPR1B	GO:0010517	regulation of phospholipase activity
AVPR1B	GO:0010460	positive regulation of heart rate
AVPR1B	GO:0055066	di-, tri-valent inorganic cation homeostasis
AVPR1B	GO:0006970	response to osmotic stress
AVPR1B	GO:0055082	cellular chemical homeostasis
AVPR1B	GO:0008015	blood circulation
AVPR1B	GO:0006875	cellular metal ion homeostasis
AVPR1B	GO:0009628	response to abiotic stimulus
AVPR1B	GO:0007166	cell surface receptor linked signal transduction
AVPR1B	GO:0007204	elevation of cytosolic calcium ion concentration
AVPR1B	GO:0055080	cation homeostasis
AVPR1B	GO:0007202	activation of phospholipase C activity
AVPR1B	GO:0007186	G-protein coupled receptor protein signaling pathway
AVPR1B	GO:0008016	regulation of heart contraction
AVPR1B	GO:0006972	hyperosmotic response
AVPR1B	GO:0009651	response to salt stress
AVPR1B	GO:0003013	circulatory system process
AVPR1B	GO:0002027	regulation of heart rate
AVPR1B	GO:0001992	regulation of systemic arterial blood pressure by vasopressin
AVPR1B	GO:0006873	cellular ion homeostasis
AVPR1B	GO:0003044	regulation of systemic arterial blood pressure mediated by a chemical signal
AVPR1B	GO:0008217	regulation of blood pressure
AVPR1B	GO:0003073	regulation of systemic arterial blood pressure
AVPR1B	GO:0006874	cellular calcium ion homeostasis
AVPR1B	GO:0001990	regulation of systemic arterial blood pressure by hormone
BCL7A	GO:0045934	negative regulation of nucleobase, nucleoside, nucleotide and nucleic acid metabolic process
BCL7A	GO:0051172	negative regulation of nitrogen compound metabolic process
BCL7A	GO:0045449	regulation of transcription
BCL7A	GO:0031327	negative regulation of cellular biosynthetic process
BCL7A	GO:0010605	negative regulation of macromolecule metabolic process
BCL7A	GO:0009890	negative regulation of biosynthetic process
BCL7A	GO:0010558	negative regulation of macromolecule biosynthetic process
BCL7A	GO:0016481	negative regulation of transcription
BCL7A	GO:0010629	negative regulation of gene expression
BEST3	GO:0051051	negative regulation of transport
BEST3	GO:0043269	regulation of ion transport
BEST3	GO:0006820	anion transport
BEST3	GO:0015698	inorganic anion transport
BEST3	GO:0006811	ion transport
BEST3	GO:0043271	negative regulation of ion transport
BLM	GO:0045449	regulation of transcription
BLM	GO:0042592	homeostatic process
BLM	GO:0043549	regulation of kinase activity
BLM	GO:0042325	regulation of phosphorylation
BLM	GO:0042770	DNA damage response, signal transduction
BLM	GO:0042129	regulation of T cell proliferation
BLM	GO:0042127	regulation of cell proliferation
BLM	GO:0042110	T cell activation
BLM	GO:0033554	stress response
BLM	GO:0045859	regulation of protein kinase activity
BLM	GO:0032946	positive regulation of mononuclear cell proliferation
BLM	GO:0045321	leukocyte activation
BLM	GO:0032944	regulation of mononuclear cell proliferation
BLM	GO:0031570	DNA integrity checkpoint
BLM	GO:0007242	intracellular signaling cascade
BLM	GO:0031297	replication fork processing
BLM	GO:0030217	T cell differentiation
BLM	GO:0031576	G2/M transition checkpoint
BLM	GO:0022402	cell cycle process
BLM	GO:0019220	regulation of phosphate metabolic process
BLM	GO:0010165	response to X-ray
BLM	GO:0010628	positive regulation of gene expression
BLM	GO:0010604	positive regulation of macromolecule metabolic process
BLM	GO:0010557	positive regulation of macromolecule biosynthetic process
BLM	GO:0010212	response to ionizing radiation
BLM	GO:0010558	negative regulation of macromolecule biosynthetic process
BLM	GO:0002520	immune system development
BLM	GO:0006461	protein complex assembly
BLM	GO:0009891	positive regulation of biosynthetic process
BLM	GO:0009628	response to abiotic stimulus
BLM	GO:0009314	response to radiation
BLM	GO:0006259	DNA metabolism
BLM	GO:0002521	leukocyte differentiation
BLM	GO:0008284	positive regulation of cell proliferation
BLM	GO:0006261	DNA-dependent DNA replication
BLM	GO:0008156	negative regulation of DNA replication
BLM	GO:0006275	regulation of DNA replication
BLM	GO:0006974	DNA damage response
BLM	GO:0006281	DNA repair
BLM	GO:0006302	double-strand break repair
BLM	GO:0006310	DNA recombination
BLM	GO:0009890	negative regulation of biosynthetic process
BLM	GO:0002694	regulation of leukocyte activation
BLM	GO:0007049	cell cycle
BLM	GO:0006260	DNA replication
BLM	GO:0000079	regulation of cyclin-dependent protein kinase activity
BLM	GO:0002684	positive regulation of immune system process
BLM	GO:0042102	positive regulation of T cell proliferation
BLM	GO:0001775	cell activation
BLM	GO:0000725	recombinational repair
BLM	GO:0045005	maintenance of fidelity during DNA-dependent DNA replication
BLM	GO:0043933	macromolecular complex subunit organization
BLM	GO:0000724	double-strand break repair via homologous recombination
BLM	GO:0000723	telomere maintenance
BLM	GO:0000278	mitotic cell cycle
BLM	GO:0031327	negative regulation of cellular biosynthetic process
BLM	GO:0010605	negative regulation of macromolecule metabolic process
BLM	GO:0031328	positive regulation of cellular biosynthetic process
BLM	GO:0000085	G2 phase of mitotic cell cycle
BLM	GO:0000077	DNA damage checkpoint
BLM	GO:0000075	cell cycle checkpoint
BLM	GO:0002696	positive regulation of leukocyte activation
BLM	GO:0030097	hemopoiesis
BLM	GO:0000019	regulation of mitotic recombination
BLM	GO:0032200	telomere organization
BLM	GO:0000018	regulation of DNA recombination
BLM	GO:0022403	cell cycle phase
BLM	GO:0031572	G2/M transition DNA damage checkpoint
BLM	GO:0030098	lymphocyte differentiation
BLM	GO:0070665	positive regulation of leukocyte proliferation
BLM	GO:0070663	regulation of leukocyte proliferation
BLM	GO:0070271	protein complex biogenesis
BLM	GO:0051782	negative regulation of cell division
BLM	GO:0065003	macromolecular complex assembly
BLM	GO:0051338	regulation of transferase activity
BLM	GO:0051329	interphase of mitotic cell cycle
BLM	GO:0060249	anatomical structure homeostasis
BLM	GO:0051325	interphase
BLM	GO:0051302	regulation of cell division
BLM	GO:0051259	protein oligomerization
BLM	GO:0051172	negative regulation of nitrogen compound metabolic process
BLM	GO:0051249	regulation of lymphocyte activation
BLM	GO:0046641	positive regulation of alpha-beta T cell proliferation
BLM	GO:0051173	positive regulation of nitrogen compound metabolic process
BLM	GO:0051098	regulation of binding
BLM	GO:0051052	regulation of DNA metabolic process
BLM	GO:0051251	positive regulation of lymphocyte activation
BLM	GO:0048534	hemopoietic or lymphoid organ development
BLM	GO:0050863	regulation of T cell activation
BLM	GO:0051319	G2 phase
BLM	GO:0050671	positive regulation of lymphocyte proliferation
BLM	GO:0050670	regulation of lymphocyte proliferation
BLM	GO:0050867	positive regulation of cell activation
BLM	GO:0051053	negative regulation of DNA metabolic process
BLM	GO:0048478	replication fork protection
BLM	GO:0051726	regulation of cell cycle
BLM	GO:0046649	lymphocyte activation
BLM	GO:0051174	regulation of phosphorus metabolic process
BLM	GO:0050870	positive regulation of T cell activation
BLM	GO:0046640	regulation of alpha-beta T cell proliferation
BLM	GO:0050865	regulation of cell activation
BLM	GO:0046635	positive regulation of alpha-beta T cell activation
BLM	GO:0046631	alpha-beta T cell activation
BLM	GO:0051276	chromosome organization
BLM	GO:0045941	positive regulation of transcription
BLM	GO:0045935	positive regulation of nucleobase, nucleoside, nucleotide and nucleic acid metabolic process
BLM	GO:0045950	negative regulation of mitotic recombination
BLM	GO:0046632	alpha-beta T cell differentiation
BLM	GO:0046634	regulation of alpha-beta T cell activation
BLM	GO:0045934	negative regulation of nucleobase, nucleoside, nucleotide and nucleic acid metabolic process
BLM	GO:0045910	negative regulation of DNA recombination
BMP2K	GO:0070167	regulation of biomineral formation
BMP2K	GO:0030500	regulation of bone mineralization
BMP2K	GO:0030278	regulation of ossification
BMP2K	GO:0016310	phosphorylation
BMP2K	GO:0006793	phosphorus metabolic process
BMP2K	GO:0006468	protein amino acid phosphorylation
BMP2K	GO:0006796	phosphate metabolic process
BPI	GO:0051241	negative regulation of multicellular organismal process
BPI	GO:0050866	negative regulation of cell activation
BPI	GO:0050865	regulation of cell activation
BPI	GO:0043031	negative regulation of macrophage activation
BPI	GO:0043030	regulation of macrophage activation
BPI	GO:0042742	defense response to bacterium
BPI	GO:0032720	negative regulation of tumor necrosis factor production
BPI	GO:0032717	negative regulation of interleukin-8 production
BPI	GO:0032715	negative regulation of interleukin-6 production
BPI	GO:0001817	regulation of cytokine production
BPI	GO:0032677	regulation of interleukin-8 production
BPI	GO:0032675	regulation of interleukin-6 production
BPI	GO:0002695	negative regulation of leukocyte activation
BPI	GO:0006952	defense response
BPI	GO:0001818	negative regulation of cytokine production
BPI	GO:0009617	response to bacterium
BPI	GO:0002694	regulation of leukocyte activation
BPI	GO:0006955	immune response
BPI	GO:0002683	negative regulation of immune system process
BPI	GO:0032680	regulation of tumor necrosis factor production
BRCA1	GO:0070647	protein modification by small protein conjugation or removal
BRCA1	GO:0080135	regulation of cellular response to stress
BRCA1	GO:0051494	negative regulation of cytoskeleton organization
BRCA1	GO:0070507	regulation of microtubule cytoskeleton organization
BRCA1	GO:0051603	proteolysis involved in cellular protein catabolic process
BRCA1	GO:0051493	regulation of cytoskeleton organization
BRCA1	GO:0051254	positive regulation of RNA metabolic process
BRCA1	GO:0051252	regulation of RNA metabolic process
BRCA1	GO:0051726	regulation of cell cycle
BRCA1	GO:0051247	positive regulation of protein metabolic process
BRCA1	GO:0051173	positive regulation of nitrogen compound metabolic process
BRCA1	GO:0051172	negative regulation of nitrogen compound metabolic process
BRCA1	GO:0051055	negative regulation of lipid biosynthetic process
BRCA1	GO:0048584	positive regulation of response to stimulus
BRCA1	GO:0051052	regulation of DNA metabolic process
BRCA1	GO:0048545	response to steroid hormone stimulus
BRCA1	GO:0046890	regulation of lipid biosynthetic process
BRCA1	GO:0046606	negative regulation of centrosome cycle
BRCA1	GO:0046600	negative regulation of centriole replication
BRCA1	GO:0046599	regulation of centriole replication
BRCA1	GO:0046394	carboxylic acid biosynthetic process
BRCA1	GO:0046605	regulation of centrosome cycle
BRCA1	GO:0045935	positive regulation of nucleobase, nucleoside, nucleotide and nucleic acid metabolic process
BRCA1	GO:0045922	negative regulation of fatty acid metabolic process
BRCA1	GO:0045833	negative regulation of lipid metabolic process
BRCA1	GO:0045739	positive regulation of DNA repair
BRCA1	GO:0045717	negative regulation of fatty acid biosynthetic process
BRCA1	GO:0045893	positive regulation of transcription, DNA-dependent
BRCA1	GO:0044265	cellular macromolecule catabolic process
BRCA1	GO:0045449	regulation of transcription
BRCA1	GO:0043068	positive regulation of programmed cell death
BRCA1	GO:0044257	cellular protein catabolic process
BRCA1	GO:0043065	positive regulation of apoptosis
BRCA1	GO:0042981	regulation of apoptosis
BRCA1	GO:0042772	DNA damage response, signal transduction resulting in transcription
BRCA1	GO:0042770	DNA damage response, signal transduction
BRCA1	GO:0042127	regulation of cell proliferation
BRCA1	GO:0040029	regulation of gene expression, epigenetic
BRCA1	GO:0033554	stress response
BRCA1	GO:0032886	regulation of microtubule-based process
BRCA1	GO:0032446	protein modification by small protein conjugation
BRCA1	GO:0032268	regulation of cellular protein metabolic process
BRCA1	GO:0032270	positive regulation of cellular protein metabolic process
BRCA1	GO:0031576	G2/M transition checkpoint
BRCA1	GO:0031572	G2/M transition DNA damage checkpoint
BRCA1	GO:0031570	DNA integrity checkpoint
BRCA1	GO:0031328	positive regulation of cellular biosynthetic process
BRCA1	GO:0031396	regulation of protein ubiquitination
BRCA1	GO:0031327	negative regulation of cellular biosynthetic process
BRCA1	GO:0031023	microtubule organizing center organization
BRCA1	GO:0030522	intracellular receptor-mediated signaling pathway
BRCA1	GO:0022402	cell cycle process
BRCA1	GO:0043067	regulation of programmed cell death
BRCA1	GO:0016567	protein ubiquitination
BRCA1	GO:0030330	DNA damage response, signal transduction by p53 class mediator
BRCA1	GO:0030163	protein catabolic process
BRCA1	GO:0019941	modification-dependent protein catabolic process
BRCA1	GO:0019216	regulation of lipid metabolic process
BRCA1	GO:0016481	negative regulation of transcription
BRCA1	GO:0030521	androgen receptor signaling pathway
BRCA1	GO:0016265	death
BRCA1	GO:0016053	organic acid biosynthetic process
BRCA1	GO:0019217	regulation of fatty acid metabolic process
BRCA1	GO:0031401	positive regulation of protein modification process
BRCA1	GO:0031399	regulation of protein modification process
BRCA1	GO:0012502	induction of programmed cell death
BRCA1	GO:0030518	steroid hormone receptor signaling pathway
BRCA1	GO:0010824	regulation of centrosome duplication
BRCA1	GO:0010942	positive regulation of cell death
BRCA1	GO:0043009	chordate embryonic development
BRCA1	GO:0031398	positive regulation of protein ubiquitination
BRCA1	GO:0010605	negative regulation of macromolecule metabolic process
BRCA1	GO:0033043	regulation of organelle organization
BRCA1	GO:0010033	response to organic substance
BRCA1	GO:0010604	positive regulation of macromolecule metabolic process
BRCA1	GO:0010557	positive regulation of macromolecule biosynthetic process
BRCA1	GO:0010564	regulation of cell cycle process
BRCA1	GO:0010212	response to ionizing radiation
BRCA1	GO:0009719	response to endogenous stimulus
BRCA1	GO:0043632	modification-dependent macromolecule catabolic process
BRCA1	GO:0043627	response to estrogen stimulus
BRCA1	GO:0042304	regulation of fatty acid biosynthetic process
BRCA1	GO:0009792	embryonic development ending in birth or egg hatching
BRCA1	GO:0010565	regulation of cellular ketone metabolic process
BRCA1	GO:0009314	response to radiation
BRCA1	GO:0010948	negative regulation of cell cycle process
BRCA1	GO:0009048	dosage compensation, by inactivation of X chromosome
BRCA1	GO:0008629	induction of apoptosis by intracellular signals
BRCA1	GO:0008630	DNA damage response, signal transduction resulting in induction of apoptosis
BRCA1	GO:0010629	negative regulation of gene expression
BRCA1	GO:0009891	positive regulation of biosynthetic process
BRCA1	GO:0008219	cell death
BRCA1	GO:0007549	dosage compensation
BRCA1	GO:0009628	response to abiotic stimulus
BRCA1	GO:0008610	lipid biosynthetic process
BRCA1	GO:0007242	intracellular signaling cascade
BRCA1	GO:0045934	negative regulation of nucleobase, nucleoside, nucleotide and nucleic acid metabolic process
BRCA1	GO:0045941	positive regulation of transcription
BRCA1	GO:0010628	positive regulation of gene expression
BRCA1	GO:0010558	negative regulation of macromolecule biosynthetic process
BRCA1	GO:0007017	microtubule-based process
BRCA1	GO:0006302	double-strand break repair
BRCA1	GO:0007059	chromosome segregation
BRCA1	GO:0007049	cell cycle
BRCA1	GO:0006978	DNA damage response, signal transduction by p53 class mediator resulting in transcription of p21 class mediator
BRCA1	GO:0006355	regulation of transcription, DNA-dependent
BRCA1	GO:0006915	apoptosis
BRCA1	GO:0006974	DNA damage response
BRCA1	GO:0006357	regulation of transcription from RNA polymerase II promoter
BRCA1	GO:0009057	macromolecule catabolic process
BRCA1	GO:0051129	negative regulation of cellular component organization
BRCA1	GO:0051054	positive regulation of DNA metabolic process
BRCA1	GO:0006631	fatty acid metabolic process
BRCA1	GO:0006633	fatty acid biosynthetic process
BRCA1	GO:0006917	induction of apoptosis
BRCA1	GO:0006508	proteolysis
BRCA1	GO:0010941	regulation of cell death
BRCA1	GO:0006359	regulation of transcription from RNA polymerase III promoter
BRCA1	GO:0007010	cytoskeleton organization
BRCA1	GO:0012501	programmed cell death
BRCA1	GO:0009890	negative regulation of biosynthetic process
BRCA1	GO:0009725	response to hormone stimulus
BRCA1	GO:0006310	DNA recombination
BRCA1	GO:0051297	centrosome organization
BRCA1	GO:0006301	postreplication repair
BRCA1	GO:0006282	regulation of DNA repair
BRCA1	GO:0007098	centrosome cycle
BRCA1	GO:0006281	DNA repair
BRCA1	GO:0010639	negative regulation of organelle organization
BRCA1	GO:0000724	double-strand break repair via homologous recombination
BRCA1	GO:0006259	DNA metabolism
BRCA1	GO:0000226	microtubule cytoskeleton organization
BRCA1	GO:0000725	recombinational repair
BRCA1	GO:0000077	DNA damage checkpoint
BRCA1	GO:0000075	cell cycle checkpoint
BRCA1	GO:0006260	DNA replication
BRWD1	GO:0006355	regulation of transcription, DNA-dependent
BRWD1	GO:0006357	regulation of transcription from RNA polymerase II promoter
BRWD1	GO:0006350	transcription
BRWD1	GO:0045449	regulation of transcription
BRWD1	GO:0051252	regulation of RNA metabolic process
BYSL	GO:0042254	ribosome biogenesis
BYSL	GO:0022613	ribonucleoprotein complex biogenesis
BYSL	GO:0022610	biological adhesion
BYSL	GO:0007565	female pregnancy
BYSL	GO:0007155	cell adhesion
C10orf137	GO:0045449	regulation of transcription
C10orf137	GO:0006350	transcription
C15orf2	GO:0048609	reproductive process in a multicellular organism
C15orf2	GO:0032504	multicellular organism reproduction
C15orf2	GO:0019953	sexual reproduction
C15orf2	GO:0007283	spermatogenesis
C15orf2	GO:0007276	gamete generation
C15orf2	GO:0048232	male gamete generation
C17orf101	GO:0055114	oxidation reduction
C1RL	GO:0051605	protein maturation by peptide bond cleavage
C1RL	GO:0051604	protein maturation
C1RL	GO:0048584	positive regulation of response to stimulus
C1RL	GO:0016485	protein processing
C1RL	GO:0016064	immunoglobulin mediated immune response
C1RL	GO:0002526	acute inflammatory response
C1RL	GO:0006959	humoral immune response
C1RL	GO:0006958	complement activation, classical pathway
C1RL	GO:0006952	defense response
C1RL	GO:0006956	complement activation
C1RL	GO:0006508	proteolysis
C1RL	GO:0002684	positive regulation of immune system process
C1RL	GO:0050778	positive regulation of immune response
C1RL	GO:0006955	immune response
C1RL	GO:0002541	activation of plasma proteins involved in acute inflammatory response
C1RL	GO:0045087	innate immune response
C1RL	GO:0019724	B cell mediated immunity
C1RL	GO:0002460	adaptive immune response based on somatic recombination of immune receptors built from immunoglobulin superfamily domains
C1RL	GO:0002455	humoral immune response mediated by circulating immunoglobulin
C1RL	GO:0009611	response to wounding
C1RL	GO:0002449	lymphocyte mediated immunity
C1RL	GO:0006954	inflammatory response
C1RL	GO:0002443	leukocyte mediated immunity
C1RL	GO:0002253	activation of immune response
C1RL	GO:0002252	immune effector process
C1RL	GO:0002250	adaptive immune response
C5	GO:0051605	protein maturation by peptide bond cleavage
C5	GO:0051604	protein maturation
C5	GO:0051338	regulation of transferase activity
C5	GO:0002253	activation of immune response
C5	GO:0051174	regulation of phosphorus metabolic process
C5	GO:0050778	positive regulation of immune response
C5	GO:0045860	positive regulation of protein kinase activity
C5	GO:0045859	regulation of protein kinase activity
C5	GO:0045087	innate immune response
C5	GO:0043549	regulation of kinase activity
C5	GO:0043406	positive regulation of MAP kinase activity
C5	GO:0043405	regulation of MAP kinase activity
C5	GO:0043009	chordate embryonic development
C5	GO:0044093	positive regulation of molecular function
C5	GO:0033674	positive regulation of kinase activity
C5	GO:0042325	regulation of phosphorylation
C5	GO:0019724	B cell mediated immunity
C5	GO:0019220	regulation of phosphate metabolic process
C5	GO:0016310	phosphorylation
C5	GO:0016265	death
C5	GO:0016064	immunoglobulin mediated immune response
C5	GO:0009792	embryonic development ending in birth or egg hatching
C5	GO:0009611	response to wounding
C5	GO:0007626	locomotory behavior
C5	GO:0007186	G-protein coupled receptor protein signaling pathway
C5	GO:0016485	protein processing
C5	GO:0006958	complement activation, classical pathway
C5	GO:0006954	inflammatory response
C5	GO:0002684	positive regulation of immune system process
C5	GO:0006959	humoral immune response
C5	GO:0006957	complement activation, alternative pathway
C5	GO:0006793	phosphorus metabolic process
C5	GO:0006955	immune response
C5	GO:0007243	protein kinase cascade
C5	GO:0042330	taxis
C5	GO:0019835	cytolysis
C5	GO:0006935	chemotaxis
C5	GO:0006796	phosphate metabolic process
C5	GO:0007166	cell surface receptor linked signal transduction
C5	GO:0006952	defense response
C5	GO:0006508	proteolysis
C5	GO:0006956	complement activation
C5	GO:0043085	positive regulation of catalytic activity
C5	GO:0048584	positive regulation of response to stimulus
C5	GO:0006468	protein amino acid phosphorylation
C5	GO:0002541	activation of plasma proteins involved in acute inflammatory response
C5	GO:0007242	intracellular signaling cascade
C5	GO:0002526	acute inflammatory response
C5	GO:0002460	adaptive immune response based on somatic recombination of immune receptors built from immunoglobulin superfamily domains
C5	GO:0002455	humoral immune response mediated by circulating immunoglobulin
C5	GO:0007610	behavior
C5	GO:0002449	lymphocyte mediated immunity
C5	GO:0002443	leukocyte mediated immunity
C5	GO:0051347	positive regulation of transferase activity
C5	GO:0000187	activation of MAPK activity
C5	GO:0002252	immune effector process
C5	GO:0001701	in utero embryonic development
C5	GO:0002250	adaptive immune response
C5	GO:0008219	cell death
C5	GO:0000165	MAPKKK cascade
C5orf4	GO:0046394	carboxylic acid biosynthetic process
C5orf4	GO:0055114	oxidation reduction
C5orf4	GO:0016053	organic acid biosynthetic process
C5orf4	GO:0008610	lipid biosynthetic process
C5orf4	GO:0006633	fatty acid biosynthetic process
C5orf4	GO:0006631	fatty acid metabolic process
C6orf15	GO:0043062	extracellular structure organization
C6orf15	GO:0030198	extracellular matrix organization
C8orf45	GO:0006260	DNA replication
C8orf45	GO:0006259	DNA metabolism
C9orf96	GO:0016310	phosphorylation
C9orf96	GO:0006796	phosphate metabolic process
C9orf96	GO:0006793	phosphorus metabolic process
C9orf96	GO:0006468	protein amino acid phosphorylation
CABLES2	GO:0051726	regulation of cell cycle
CABLES2	GO:0051302	regulation of cell division
CABLES2	GO:0051301	cell division
CABLES2	GO:0007049	cell cycle
CACNA1A	GO:0070271	protein complex biogenesis
CACNA1A	GO:0060627	regulation of vesicle-mediated transport
CACNA1A	GO:0060548	negative regulation of cell death
CACNA1A	GO:0060341	regulation of cellular localization
CACNA1A	GO:0060284	regulation of cell development
CACNA1A	GO:0060024	rhythmic synaptic transmission
CACNA1A	GO:0060004	reflex
CACNA1A	GO:0055085	transmembrane transport
CACNA1A	GO:0055082	cellular chemical homeostasis
CACNA1A	GO:0055081	anion homeostasis
CACNA1A	GO:0055080	cation homeostasis
CACNA1A	GO:0055064	chloride ion homeostasis
CACNA1A	GO:0051960	regulation of nervous system development
CACNA1A	GO:0051952	regulation of amine transport
CACNA1A	GO:0051899	membrane depolarization
CACNA1A	GO:0051588	regulation of neurotransmitter transport
CACNA1A	GO:0051480	cytosolic calcium ion homeostasis
CACNA1A	GO:0051969	regulation of transmission of nerve impulse
CACNA1A	GO:0051046	regulation of secretion
CACNA1A	GO:0050905	neuromuscular process
CACNA1A	GO:0050883	musculoskeletal movement, spinal reflex action
CACNA1A	GO:0050881	musculoskeletal movement
CACNA1A	GO:0050879	multicellular organismal movement
CACNA1A	GO:0050808	synapse organization
CACNA1A	GO:0050804	regulation of synaptic transmission
CACNA1A	GO:0055066	di-, tri-valent inorganic cation homeostasis
CACNA1A	GO:0050801	ion homeostasis
CACNA1A	GO:0050767	regulation of neurogenesis
CACNA1A	GO:0050770	regulation of axonogenesis
CACNA1A	GO:0048858	cell projection morphogenesis
CACNA1A	GO:0048813	dendrite morphogenesis
CACNA1A	GO:0048812	neuron projection morphogenesis
CACNA1A	GO:0055074	calcium ion homeostasis
CACNA1A	GO:0048791	calcium ion-dependent exocytosis of neurotransmitter
CACNA1A	GO:0048666	neuron development
CACNA1A	GO:0048266	behavioral response to pain
CACNA1A	GO:0048265	response to pain
CACNA1A	GO:0046942	carboxylic acid transport
CACNA1A	GO:0046928	regulation of neurotransmitter secretion
CACNA1A	GO:0046885	regulation of hormone biosynthetic process
CACNA1A	GO:0043524	negative regulation of neuron apoptosis
CACNA1A	GO:0043623	cellular protein complex assembly
CACNA1A	GO:0043523	regulation of neuron apoptosis
CACNA1A	GO:0043933	macromolecular complex subunit organization
CACNA1A	GO:0043113	receptor clustering
CACNA1A	GO:0043112	receptor metabolic process
CACNA1A	GO:0043067	regulation of programmed cell death
CACNA1A	GO:0043066	negative regulation of apoptosis
CACNA1A	GO:0043062	extracellular structure organization
CACNA1A	GO:0042592	homeostatic process
CACNA1A	GO:0042445	hormone metabolic process
CACNA1A	GO:0042403	thyroid hormone metabolic process
CACNA1A	GO:0042133	neurotransmitter metabolic process
CACNA1A	GO:0040007	growth
CACNA1A	GO:0035249	synaptic transmission, glutamatergic
CACNA1A	GO:0034622	cellular macromolecular complex assembly
CACNA1A	GO:0034621	cellular macromolecular complex subunit organization
CACNA1A	GO:0033555	multicellular organismal response to stress
CACNA1A	GO:0032990	cell part morphogenesis
CACNA1A	GO:0032940	secretion by cell
CACNA1A	GO:0032535	regulation of cellular component size
CACNA1A	GO:0032353	negative regulation of hormone biosynthetic process
CACNA1A	GO:0032350	regulation of hormone metabolic process
CACNA1A	GO:0031644	regulation of neurological system process
CACNA1A	GO:0031344	regulation of cell projection organization
CACNA1A	GO:0031175	neuron projection development
CACNA1A	GO:0030902	hindbrain development
CACNA1A	GO:0030644	cellular chloride ion homeostasis
CACNA1A	GO:0030534	adult behavior
CACNA1A	GO:0030320	cellular monovalent inorganic anion homeostasis
CACNA1A	GO:0030182	neuron differentiation
CACNA1A	GO:0030030	cell projection organization
CACNA1A	GO:0030003	cellular cation homeostasis
CACNA1A	GO:0030005	cellular di-, tri-valent inorganic cation homeostasis
CACNA1A	GO:0030001	metal ion transport
CACNA1A	GO:0030002	cellular anion homeostasis
CACNA1A	GO:0022604	regulation of cell morphogenesis
CACNA1A	GO:0022037	metencephalon development
CACNA1A	GO:0021953	central nervous system neuron differentiation
CACNA1A	GO:0021750	vestibular nucleus development
CACNA1A	GO:0021702	cerebellar Purkinje cell differentiation
CACNA1A	GO:0021700	developmental maturation
CACNA1A	GO:0021697	cerebellar cortex formation
CACNA1A	GO:0021696	cerebellar cortex morphogenesis
CACNA1A	GO:0021695	cerebellar cortex development
CACNA1A	GO:0021694	cerebellar Purkinje cell layer formation
CACNA1A	GO:0021692	cerebellar Purkinje cell layer morphogenesis
CACNA1A	GO:0021680	cerebellar Purkinje cell layer development
CACNA1A	GO:0031327	negative regulation of cellular biosynthetic process
CACNA1A	GO:0032351	negative regulation of hormone metabolic process
CACNA1A	GO:0021626	central nervous system maturation
CACNA1A	GO:0021587	cerebellum morphogenesis
CACNA1A	GO:0032989	cellular component morphogenesis
CACNA1A	GO:0021578	hindbrain maturation
CACNA1A	GO:0021575	hindbrain morphogenesis
CACNA1A	GO:0021549	cerebellum development
CACNA1A	GO:0021548	pons development
CACNA1A	GO:0021533	cell differentiation in hindbrain
CACNA1A	GO:0021590	cerebellum maturation
CACNA1A	GO:0021522	spinal cord motor neuron differentiation
CACNA1A	GO:0021517	ventral spinal cord development
CACNA1A	GO:0021679	cerebellar molecular layer development
CACNA1A	GO:0021515	cell differentiation in spinal cord
CACNA1A	GO:0021510	spinal cord development
CACNA1A	GO:0019725	cellular homeostasis
CACNA1A	GO:0019318	hexose metabolic process
CACNA1A	GO:0019226	transmission of nerve impulse
CACNA1A	GO:0042391	regulation of membrane potential
CACNA1A	GO:0046903	secretion
CACNA1A	GO:0042981	regulation of apoptosis
CACNA1A	GO:0045664	regulation of neuron differentiation
CACNA1A	GO:0044057	regulation of system process
CACNA1A	GO:0043069	negative regulation of programmed cell death
CACNA1A	GO:0017158	regulation of calcium ion-dependent exocytosis
CACNA1A	GO:0017157	regulation of exocytosis
CACNA1A	GO:0017156	calcium ion-dependent exocytosis
CACNA1A	GO:0016358	dendrite development
CACNA1A	GO:0016265	death
CACNA1A	GO:0016192	vesicle-mediated transport
CACNA1A	GO:0016049	cell growth
CACNA1A	GO:0015849	organic acid transport
CACNA1A	GO:0015674	di-, tri-valent inorganic cation transport
CACNA1A	GO:0010975	regulation of neuron projection development
CACNA1A	GO:0010941	regulation of cell death
CACNA1A	GO:0008361	regulation of cell size
CACNA1A	GO:0007626	locomotory behavior
CACNA1A	GO:0007270	nerve-nerve synaptic transmission
CACNA1A	GO:0007267	cell-cell signaling
CACNA1A	GO:0007214	gamma-aminobutyric acid signaling pathway
CACNA1A	GO:0048667	cell morphogenesis involved in neuron differentiation
CACNA1A	GO:0048857	neural nucleus development
CACNA1A	GO:0007169	transmembrane receptor protein tyrosine kinase signaling pathway
CACNA1A	GO:0006875	cellular metal ion homeostasis
CACNA1A	GO:0048878	chemical homeostasis
CACNA1A	GO:0006873	cellular ion homeostasis
CACNA1A	GO:0006887	exocytosis
CACNA1A	GO:0006836	neurotransmitter transport
CACNA1A	GO:0006816	calcium ion transport
CACNA1A	GO:0006811	ion transport
CACNA1A	GO:0006790	sulfur metabolic process
CACNA1A	GO:0050877	neurological system process
CACNA1A	GO:0050885	neuromuscular process controlling balance
CACNA1A	GO:0006461	protein complex assembly
CACNA1A	GO:0006006	glucose metabolic process
CACNA1A	GO:0005996	monosaccharide metabolic process
CACNA1A	GO:0006812	cation transport
CACNA1A	GO:0006865	amino acid transport
CACNA1A	GO:0003001	generation of a signal involved in cell-cell signaling
CACNA1A	GO:0055065	metal ion homeostasis
CACNA1A	GO:0001505	regulation of neurotransmitter levels
CACNA1A	GO:0000904	cell morphogenesis involved in differentiation
CACNA1A	GO:0000902	cell morphogenesis
CACNA1A	GO:0006874	cellular calcium ion homeostasis
CACNA1A	GO:0007166	cell surface receptor linked signal transduction
CACNA1A	GO:0000096	sulfur amino acid metabolic process
CACNA1A	GO:0007172	signal complex assembly
CACNA1A	GO:0007186	G-protein coupled receptor protein signaling pathway
CACNA1A	GO:0007204	elevation of cytosolic calcium ion concentration
CACNA1A	GO:0007167	enzyme linked receptor protein signaling pathway
CACNA1A	GO:0007268	synaptic transmission
CACNA1A	GO:0055083	monovalent inorganic anion homeostasis
CACNA1A	GO:0007610	behavior
CACNA1A	GO:0007416	synaptogenesis
CACNA1A	GO:0007628	adult walking behavior
CACNA1A	GO:0008219	cell death
CACNA1A	GO:0065003	macromolecular complex assembly
CACNA1A	GO:0007274	neuromuscular synaptic transmission
CACNA1A	GO:0008344	adult locomotory behavior
CACNA1A	GO:0009890	negative regulation of biosynthetic process
CACNA1A	GO:0010769	regulation of cell morphogenesis involved in differentiation
CACNA1A	GO:0014051	gamma-aminobutyric acid secretion
CACNA1A	GO:0014056	regulation of acetylcholine secretion
CACNA1A	GO:0010817	regulation of hormone levels
CACNA1A	GO:0015812	gamma-aminobutyric acid transport
CACNA1A	GO:0015807	L-amino acid transport
CACNA1A	GO:0015837	amine transport
CACNA1A	GO:0007269	neurotransmitter secretion
CAMLG	GO:0043112	receptor metabolic process
CAMLG	GO:0007173	epidermal growth factor receptor signaling pathway
CAMLG	GO:0007169	transmembrane receptor protein tyrosine kinase signaling pathway
CAMLG	GO:0007167	enzyme linked receptor protein signaling pathway
CAMLG	GO:0007166	cell surface receptor linked signal transduction
CAMLG	GO:0006952	defense response
CAMLG	GO:0001881	receptor recycling
CAPN1	GO:0042127	regulation of cell proliferation
CAPN1	GO:0016540	protein autoprocessing
CAPN1	GO:0016485	protein processing
CAPN1	GO:0008284	positive regulation of cell proliferation
CAPN1	GO:0006508	proteolysis
CAPN1	GO:0051604	protein maturation
CAPN13	GO:0006508	proteolysis
CAPRIN2	GO:0045926	negative regulation of growth
CAPRIN2	GO:0045792	negative regulation of cell size
CAPRIN2	GO:0040008	regulation of growth
CAPRIN2	GO:0032535	regulation of cellular component size
CAPRIN2	GO:0030308	negative regulation of cell growth
CAPRIN2	GO:0008361	regulation of cell size
CAPRIN2	GO:0001558	regulation of cell growth
CASC5	GO:0048609	reproductive process in a multicellular organism
CASC5	GO:0048515	spermatid differentiation
CASC5	GO:0048232	male gamete generation
CASC5	GO:0048610	reproductive cellular process
CASC5	GO:0032989	cellular component morphogenesis
CASC5	GO:0032504	multicellular organism reproduction
CASC5	GO:0010927	cellular component assembly involved in morphogenesis
CASC5	GO:0007286	spermatid development
CASC5	GO:0007283	spermatogenesis
CASC5	GO:0019953	sexual reproduction
CASC5	GO:0007281	germ cell development
CASC5	GO:0007276	gamete generation
CASC5	GO:0003006	repro dev process
CASC5	GO:0001675	acrosome assembly
CASP10	GO:0043068	positive regulation of programmed cell death
CASP10	GO:0043067	regulation of programmed cell death
CASP10	GO:0043065	positive regulation of apoptosis
CASP10	GO:0042981	regulation of apoptosis
CASP10	GO:0016265	death
CASP10	GO:0012502	induction of programmed cell death
CASP10	GO:0012501	programmed cell death
CASP10	GO:0010942	positive regulation of cell death
CASP10	GO:0010941	regulation of cell death
CASP10	GO:0008624	induction of apoptosis by extracellular signals
CASP10	GO:0008219	cell death
CASP10	GO:0006917	induction of apoptosis
CASP10	GO:0006915	apoptosis
CASP10	GO:0006508	proteolysis
CASR	GO:0055082	cellular chemical homeostasis
CASR	GO:0060348	bone development
CASR	GO:0055080	cation homeostasis
CASR	GO:0055074	calcium ion homeostasis
CASR	GO:0055066	di-, tri-valent inorganic cation homeostasis
CASR	GO:0051924	regulation of calcium ion transport
CASR	GO:0051606	detection of stimulus
CASR	GO:0051592	response to calcium ion
CASR	GO:0051336	regulation of hydrolase activity
CASR	GO:0050801	ion homeostasis
CASR	GO:0048878	chemical homeostasis
CASR	GO:0044093	positive regulation of molecular function
CASR	GO:0043462	regulation of ATPase activity
CASR	GO:0043269	regulation of ion transport
CASR	GO:0043085	positive regulation of catalytic activity
CASR	GO:0042592	homeostatic process
CASR	GO:0032781	positive regulation of ATPase activity
CASR	GO:0030005	cellular di-, tri-valent inorganic cation homeostasis
CASR	GO:0030003	cellular cation homeostasis
CASR	GO:0051345	positive regulation of hydrolase activity
CASR	GO:0019932	second-messenger-mediated signaling
CASR	GO:0019725	cellular homeostasis
CASR	GO:0019722	calcium-mediated signaling
CASR	GO:0010959	regulation of metal ion transport
CASR	GO:0055065	metal ion homeostasis
CASR	GO:0010035	response to inorganic substance
CASR	GO:0010038	response to metal ion
CASR	GO:0009593	detection of chemical stimulus
CASR	GO:0007635	chemosensory behavior
CASR	GO:0007610	behavior
CASR	GO:0007242	intracellular signaling cascade
CASR	GO:0007186	G-protein coupled receptor protein signaling pathway
CASR	GO:0007166	cell surface receptor linked signal transduction
CASR	GO:0006875	cellular metal ion homeostasis
CASR	GO:0006874	cellular calcium ion homeostasis
CASR	GO:0006873	cellular ion homeostasis
CASR	GO:0005513	detection of calcium ion
CASR	GO:0001503	ossification
CASR	GO:0001501	skeletal system development
CATSPER4	GO:0007276	gamete generation
CATSPER4	GO:0055085	transmembrane transport
CATSPER4	GO:0051674	localization of cell
CATSPER4	GO:0048870	cell motility
CATSPER4	GO:0048609	reproductive process in a multicellular organism
CATSPER4	GO:0048232	male gamete generation
CATSPER4	GO:0032504	multicellular organism reproduction
CATSPER4	GO:0030317	sperm motility
CATSPER4	GO:0030001	metal ion transport
CATSPER4	GO:0019953	sexual reproduction
CATSPER4	GO:0015674	di-, tri-valent inorganic cation transport
CATSPER4	GO:0015672	monovalent inorganic cation transport
CATSPER4	GO:0007283	spermatogenesis
CATSPER4	GO:0006928	cell motion
CATSPER4	GO:0006816	calcium ion transport
CATSPER4	GO:0006814	sodium ion transport
CATSPER4	GO:0006812	cation transport
CATSPER4	GO:0006811	ion transport
CATSPER4	GO:0001539	ciliary or flagellar motility
CCBP2	GO:0007166	cell surface receptor linked signal transduction
CCBP2	GO:0042330	taxis
CCBP2	GO:0007626	locomotory behavior
CCBP2	GO:0007610	behavior
CCBP2	GO:0007186	G-protein coupled receptor protein signaling pathway
CCBP2	GO:0006955	immune response
CCBP2	GO:0006935	chemotaxis
CCHCR1	GO:0051168	nuclear export
CCHCR1	GO:0034613	cellular protein localization
CCHCR1	GO:0015031	protein transport
CCHCR1	GO:0008104	protein localization
CCHCR1	GO:0006913	nucleocytoplasmic transport
CCHCR1	GO:0006886	intracellular protein transport
CCHCR1	GO:0006611	protein export from nucleus
CCHCR1	GO:0045184	establishment of protein localization
CCHCR1	GO:0046907	intracellular transport
CCHCR1	GO:0006605	protein targeting
CCHCR1	GO:0051169	nuclear transport
CCHCR1	GO:0070727	cellular macromolecule localization
CCIN	GO:0048609	reproductive process in a multicellular organism
CCIN	GO:0007283	spermatogenesis
CCIN	GO:0007276	gamete generation
CCIN	GO:0019953	sexual reproduction
CCIN	GO:0032504	multicellular organism reproduction
CCIN	GO:0048232	male gamete generation
CCL22	GO:0042330	taxis
CCL22	GO:0007626	locomotory behavior
CCL22	GO:0007267	cell-cell signaling
CCL22	GO:0006955	immune response
CCL22	GO:0006954	inflammatory response
CCL22	GO:0006928	cell motion
CCL22	GO:0006935	chemotaxis
CCL22	GO:0007610	behavior
CCL22	GO:0009615	response to virus
CCL22	GO:0009611	response to wounding
CCL22	GO:0016477	cell migration
CCL22	GO:0051674	localization of cell
CCL22	GO:0006952	defense response
CCL22	GO:0048870	cell motility
CCP110	GO:0051297	centrosome organization
CCP110	GO:0022402	cell cycle process
CCP110	GO:0007099	centriole replication
CCP110	GO:0007010	cytoskeleton organization
CCP110	GO:0000226	microtubule cytoskeleton organization
CCP110	GO:0007017	microtubule-based process
CCP110	GO:0007049	cell cycle
CCP110	GO:0007098	centrosome cycle
CCP110	GO:0051298	centrosome duplication
CCP110	GO:0051302	regulation of cell division
CCP110	GO:0032465	regulation of cytokinesis
CCP110	GO:0031023	microtubule organizing center organization
CD5	GO:0070663	regulation of leukocyte proliferation
CD5	GO:0051249	regulation of lymphocyte activation
CD5	GO:0050870	positive regulation of T cell activation
CD5	GO:0050867	positive regulation of cell activation
CD5	GO:0050863	regulation of T cell activation
CD5	GO:0050670	regulation of lymphocyte proliferation
CD5	GO:0043068	positive regulation of programmed cell death
CD5	GO:0043067	regulation of programmed cell death
CD5	GO:0043065	positive regulation of apoptosis
CD5	GO:0042127	regulation of cell proliferation
CD5	GO:0031294	lymphocyte costimulation
CD5	GO:0012502	induction of programmed cell death
CD5	GO:0008283	cell proliferation
CD5	GO:0002694	regulation of leukocyte activation
CD5	GO:0050865	regulation of cell activation
CD5	GO:0051251	positive regulation of lymphocyte activation
CD5	GO:0002684	positive regulation of immune system process
CD5	GO:0002696	positive regulation of leukocyte activation
CD5	GO:0006917	induction of apoptosis
CD5	GO:0008037	cell recognition
CD5	GO:0008624	induction of apoptosis by extracellular signals
CD5	GO:0010941	regulation of cell death
CD5	GO:0010942	positive regulation of cell death
CD5	GO:0031295	T cell costimulation
CD5	GO:0032944	regulation of mononuclear cell proliferation
CD5	GO:0042981	regulation of apoptosis
CDKL1	GO:0016310	phosphorylation
CDKL1	GO:0006796	phosphate metabolic process
CDKL1	GO:0006793	phosphorus metabolic process
CDKL1	GO:0006468	protein amino acid phosphorylation
CER1	GO:0048870	cell motility
CER1	GO:0048598	embryonic morphogenesis
CER1	GO:0042127	regulation of cell proliferation
CER1	GO:0030514	negative regulation of BMP signaling pathway
CER1	GO:0030510	regulation of BMP signaling pathway
CER1	GO:0030509	BMP signaling pathway
CER1	GO:0016477	cell migration
CER1	GO:0010648	negative regulation of cell communication
CER1	GO:0009968	negative regulation of signal transduction
CER1	GO:0009952	anterior/posterior pattern formation
CER1	GO:0042074	cell migration involved in gastrulation
CER1	GO:0009948	anterior/posterior axis specification
CER1	GO:0007389	pattern specification process
CER1	GO:0051674	localization of cell
CER1	GO:0007178	transmembrane receptor protein serine/threonine kinase signaling pathway
CER1	GO:0007167	enzyme linked receptor protein signaling pathway
CER1	GO:0007369	gastrulation
CER1	GO:0007166	cell surface receptor linked signal transduction
CER1	GO:0006928	cell motion
CER1	GO:0009798	axis specification
CER1	GO:0003002	regionalization
CER1	GO:0008285	negative regulation of cell proliferation
CER1	GO:0001667	ameboidal cell migration
CHAT	GO:0060538	skeletal muscle organ development
CHAT	GO:0060537	muscle tissue development
CHAT	GO:0060024	rhythmic synaptic transmission
CHAT	GO:0055002	striated muscle cell development
CHAT	GO:0055001	muscle cell development
CHAT	GO:0051146	striated muscle cell differentiation
CHAT	GO:0050877	neurological system process
CHAT	GO:0050808	synapse organization
CHAT	GO:0048747	muscle fiber development
CHAT	GO:0048741	skeletal muscle fiber development
CHAT	GO:0048666	neuron development
CHAT	GO:0043179	rhythmic excitation
CHAT	GO:0044057	regulation of system process
CHAT	GO:0043062	extracellular structure organization
CHAT	GO:0042133	neurotransmitter metabolic process
CHAT	GO:0031644	regulation of neurological system process
CHAT	GO:0031175	neuron projection development
CHAT	GO:0030182	neuron differentiation
CHAT	GO:0030534	adult behavior
CHAT	GO:0030030	cell projection organization
CHAT	GO:0050804	regulation of synaptic transmission
CHAT	GO:0019226	transmission of nerve impulse
CHAT	GO:0042136	neurotransmitter biosynthetic process
CHAT	GO:0016358	dendrite development
CHAT	GO:0042692	muscle cell differentiation
CHAT	GO:0014706	striated muscle tissue development
CHAT	GO:0008344	adult locomotory behavior
CHAT	GO:0051969	regulation of transmission of nerve impulse
CHAT	GO:0007628	adult walking behavior
CHAT	GO:0048511	rhythmic process
CHAT	GO:0007626	locomotory behavior
CHAT	GO:0007622	rhythmic behavior
CHAT	GO:0007610	behavior
CHAT	GO:0007529	establishment of synaptic specificity at neuromuscular junction
CHAT	GO:0007528	neuromuscular junction development
CHAT	GO:0007519	skeletal muscle tissue development
CHAT	GO:0007517	muscle organ development
CHAT	GO:0007267	cell-cell signaling
CHAT	GO:0001505	regulation of neurotransmitter levels
CHAT	GO:0007268	synaptic transmission
CHAT	GO:0007274	neuromuscular synaptic transmission
CHD1L	GO:0051276	chromosome organization
CHD1L	GO:0033554	stress response
CHD1L	GO:0016568	chromatin modification
CHD1L	GO:0006974	DNA damage response
CHD1L	GO:0006338	chromatin remodeling
CHD1L	GO:0006325	chromatin organization
CHD1L	GO:0006281	DNA repair
CHD1L	GO:0006259	DNA metabolism
CIAPIN1	GO:0060548	negative regulation of cell death
CIAPIN1	GO:0043069	negative regulation of programmed cell death
CIAPIN1	GO:0030097	hemopoiesis
CIAPIN1	GO:0016265	death
CIAPIN1	GO:0012501	programmed cell death
CIAPIN1	GO:0010941	regulation of cell death
CIAPIN1	GO:0008219	cell death
CIAPIN1	GO:0006916	anti-apoptosis
CIAPIN1	GO:0006915	apoptosis
CIAPIN1	GO:0002520	immune system development
CIAPIN1	GO:0042981	regulation of apoptosis
CIAPIN1	GO:0043066	negative regulation of apoptosis
CIAPIN1	GO:0043067	regulation of programmed cell death
CIAPIN1	GO:0048534	hemopoietic or lymphoid organ development
CLEC1B	GO:0007166	cell surface receptor linked signal transduction
CLEC1B	GO:0006952	defense response
CLEC7A	GO:0060627	regulation of vesicle-mediated transport
CLEC7A	GO:0051130	positive regulation of cellular component organization
CLEC7A	GO:0050778	positive regulation of immune response
CLEC7A	GO:0050766	positive regulation of phagocytosis
CLEC7A	GO:0050764	regulation of phagocytosis
CLEC7A	GO:0048584	positive regulation of response to stimulus
CLEC7A	GO:0046649	lymphocyte activation
CLEC7A	GO:0051050	positive regulation of transport
CLEC7A	GO:0045807	positive regulation of endocytosis
CLEC7A	GO:0045321	leukocyte activation
CLEC7A	GO:0045088	regulation of innate immune response
CLEC7A	GO:0045087	innate immune response
CLEC7A	GO:0042832	defense response to protozoan
CLEC7A	GO:0032760	positive regulation of tumor necrosis factor production
CLEC7A	GO:0032680	regulation of tumor necrosis factor production
CLEC7A	GO:0031349	positive regulation of defense response
CLEC7A	GO:0030100	regulation of endocytosis
CLEC7A	GO:0016337	cell-cell adhesion
CLEC7A	GO:0016192	vesicle-mediated transport
CLEC7A	GO:0010324	membrane invagination
CLEC7A	GO:0016044	membrane organization
CLEC7A	GO:0010033	response to organic substance
CLEC7A	GO:0009743	response to carbohydrate stimulus
CLEC7A	GO:0009620	response to fungus
CLEC7A	GO:0009611	response to wounding
CLEC7A	GO:0009756	carbohydrate mediated signaling
CLEC7A	GO:0009595	detection of biotic stimulus
CLEC7A	GO:0009581	detection of external stimulus
CLEC7A	GO:0008037	cell recognition
CLEC7A	GO:0016046	detection of fungus
CLEC7A	GO:0007242	intracellular signaling cascade
CLEC7A	GO:0022610	biological adhesion
CLEC7A	GO:0007155	cell adhesion
CLEC7A	GO:0006955	immune response
CLEC7A	GO:0006954	inflammatory response
CLEC7A	GO:0006952	defense response
CLEC7A	GO:0006911	phagocytosis, engulfment
CLEC7A	GO:0006910	phagocytosis, recognition
CLEC7A	GO:0006909	phagocytosis
CLEC7A	GO:0051606	detection of stimulus
CLEC7A	GO:0042110	T cell activation
CLEC7A	GO:0045089	positive regulation of innate immune response
CLEC7A	GO:0006897	endocytosis
CLEC7A	GO:0002768	immune response-regulating cell surface receptor signaling pathway
CLEC7A	GO:0002764	immune response-regulating signal transduction
CLEC7A	GO:0002758	innate immune response-activating signal transduction
CLEC7A	GO:0051240	positive regulation of multicellular organismal process
CLEC7A	GO:0002757	immune response-activating signal transduction
CLEC7A	GO:0002752	cell surface pattern recognition receptor signaling pathway
CLEC7A	GO:0007166	cell surface receptor linked signal transduction
CLEC7A	GO:0002684	positive regulation of immune system process
CLEC7A	GO:0002429	immune response-activating cell surface receptor signaling pathway
CLEC7A	GO:0002253	activation of immune response
CLEC7A	GO:0002238	response to molecule of fungal origin
CLEC7A	GO:0002221	pattern recognition receptor signaling pathway
CLEC7A	GO:0002220	innate immune response activating cell surface receptor signaling pathway
CLEC7A	GO:0002218	activation of innate immune response
CLEC7A	GO:0001879	detection of yeast
CLEC7A	GO:0001878	response to yeast
CLEC7A	GO:0001819	positive regulation of cytokine production
CLEC7A	GO:0001817	regulation of cytokine production
CLEC7A	GO:0001775	cell activation
CLEC7A	GO:0001562	response to protozoan
CLTCL1	GO:0046907	intracellular transport
CLTCL1	GO:0070727	cellular macromolecule localization
CLTCL1	GO:0045184	establishment of protein localization
CLTCL1	GO:0034613	cellular protein localization
CLTCL1	GO:0016192	vesicle-mediated transport
CLTCL1	GO:0016044	membrane organization
CLTCL1	GO:0015031	protein transport
CLTCL1	GO:0010324	membrane invagination
CLTCL1	GO:0008104	protein localization
CLTCL1	GO:0006898	receptor-mediated endocytosis
CLTCL1	GO:0006897	endocytosis
CLTCL1	GO:0006886	intracellular protein transport
CNGB3	GO:0050890	cognition
CNGB3	GO:0006811	ion transport
CNGB3	GO:0007600	sensory perception
CNGB3	GO:0007601	visual perception
CNGB3	GO:0050877	neurological system process
CNGB3	GO:0050953	sensory perception of light stimulus
CNGB3	GO:0055085	transmembrane transport
CNR2	GO:0019935	cyclic-nucleotide-mediated signaling
CNR2	GO:0019932	second-messenger-mediated signaling
CNR2	GO:0009611	response to wounding
CNR2	GO:0007610	behavior
CNR2	GO:0007242	intracellular signaling cascade
CNR2	GO:0007187	G-protein signaling, coupled to cyclic nucleotide second messenger
CNR2	GO:0007186	G-protein coupled receptor protein signaling pathway
CNR2	GO:0007166	cell surface receptor linked signal transduction
CNR2	GO:0006955	immune response
CNR2	GO:0006954	inflammatory response
CNR2	GO:0006952	defense response
CNTNAP1	GO:0022610	biological adhesion
CNTNAP1	GO:0007155	cell adhesion
COL12A1	GO:0043062	extracellular structure organization
COL12A1	GO:0030199	collagen fibril organization
COL12A1	GO:0030198	extracellular matrix organization
COL12A1	GO:0022610	biological adhesion
COL12A1	GO:0007155	cell adhesion
COL12A1	GO:0001501	skeletal system development
COL18A1	GO:0009415	response to water
COL18A1	GO:0043065	positive regulation of apoptosis
COL18A1	GO:0060429	epithelium development
COL18A1	GO:0051599	response to hydrostatic pressure
COL18A1	GO:0051272	positive regulation of cell motion
COL18A1	GO:0050953	sensory perception of light stimulus
COL18A1	GO:0050890	cognition
COL18A1	GO:0050877	neurological system process
COL18A1	GO:0048514	blood vessel morphogenesis
COL18A1	GO:0045446	endothelial cell differentiation
COL18A1	GO:0043068	positive regulation of programmed cell death
COL18A1	GO:0043067	regulation of programmed cell death
COL18A1	GO:0043062	extracellular structure organization
COL18A1	GO:0042981	regulation of apoptosis
COL18A1	GO:0042493	response to drug
COL18A1	GO:0042127	regulation of cell proliferation
COL18A1	GO:0040017	positive regulation of locomotion
COL18A1	GO:0040012	regulation of locomotion
COL18A1	GO:0032989	cellular component morphogenesis
COL18A1	GO:0030855	epithelial cell differentiation
COL18A1	GO:0030335	positive regulation of cell migration
COL18A1	GO:0030334	regulation of cell migration
COL18A1	GO:0030198	extracellular matrix organization
COL18A1	GO:0022610	biological adhesion
COL18A1	GO:0010942	positive regulation of cell death
COL18A1	GO:0010941	regulation of cell death
COL18A1	GO:0009628	response to abiotic stimulus
COL18A1	GO:0051270	regulation of cell motion
COL18A1	GO:0008285	negative regulation of cell proliferation
COL18A1	GO:0008284	positive regulation of cell proliferation
COL18A1	GO:0007601	visual perception
COL18A1	GO:0007600	sensory perception
COL18A1	GO:0007155	cell adhesion
COL18A1	GO:0002064	epithelial cell development
COL18A1	GO:0001944	vasculature development
COL18A1	GO:0001886	endothelial cell morphogenesis
COL18A1	GO:0001885	endothelial cell development
COL18A1	GO:0001568	blood vessel development
COL18A1	GO:0001525	angiogenesis
COL18A1	GO:0000904	cell morphogenesis involved in differentiation
COL18A1	GO:0000902	cell morphogenesis
COL21A1	GO:0022610	biological adhesion
COL21A1	GO:0007155	cell adhesion
COL22A1	GO:0007155	cell adhesion
COL22A1	GO:0022610	biological adhesion
COL24A1	GO:0022610	biological adhesion
COL24A1	GO:0007155	cell adhesion
COL28A1	GO:0022610	biological adhesion
COL28A1	GO:0007155	cell adhesion
COL2A1	GO:0060548	negative regulation of cell death
COL2A1	GO:0060351	cartilage development involved in endochondral bone morphogenesis
COL2A1	GO:0060350	endochondral bone morphogenesis
COL2A1	GO:0060348	bone development
COL2A1	GO:0060272	embryonic skeletal joint morphogenesis
COL2A1	GO:0060249	anatomical structure homeostasis
COL2A1	GO:0060173	limb development
COL2A1	GO:0051216	cartilage development
COL2A1	GO:0050954	sensory perception of mechanical stimulus
COL2A1	GO:0048871	multicellular organismal homeostasis
COL2A1	GO:0048705	skeletal system morphogenesis
COL2A1	GO:0048562	embryonic organ morphogenesis
COL2A1	GO:0043069	negative regulation of programmed cell death
COL2A1	GO:0043067	regulation of programmed cell death
COL2A1	GO:0043066	negative regulation of apoptosis
COL2A1	GO:0042592	homeostatic process
COL2A1	GO:0035107	appendage morphogenesis
COL2A1	GO:0016337	cell-cell adhesion
COL2A1	GO:0009100	glycoprotein metabolic process
COL2A1	GO:0007605	sensory perception of sound
COL2A1	GO:0007423	sensory organ development
COL2A1	GO:0002062	chondrocyte differentiation
COL2A1	GO:0001502	cartilage condensation
COL2A1	GO:0001501	skeletal system development
COL2A1	GO:0001958	endochondral ossification
COL2A1	GO:0001894	tissue homeostasis
COL2A1	GO:0003007	heart morphogenesis
COL2A1	GO:0006029	proteoglycan metabolic process
COL2A1	GO:0001503	ossification
COL2A1	GO:0007155	cell adhesion
COL2A1	GO:0007507	heart development
COL2A1	GO:0007600	sensory perception
COL2A1	GO:0009792	embryonic development ending in birth or egg hatching
COL2A1	GO:0010941	regulation of cell death
COL2A1	GO:0007601	visual perception
COL2A1	GO:0030198	extracellular matrix organization
COL2A1	GO:0022610	biological adhesion
COL2A1	GO:0030199	collagen fibril organization
COL2A1	GO:0042471	ear morphogenesis
COL2A1	GO:0042472	inner ear morphogenesis
COL2A1	GO:0042981	regulation of apoptosis
COL2A1	GO:0043009	chordate embryonic development
COL2A1	GO:0035108	limb morphogenesis
COL2A1	GO:0043062	extracellular structure organization
COL2A1	GO:0060349	bone morphogenesis
[truncated: 7,585 more rows]

## Sheet: Supplemental Table 8
		Type 1 error rates
	P-value threshold	Reverse Genetics Model (2 or more diagnoses)	Reverse Genetics Model (2 or more diagnoses and Fisher's p<0.1)
Thrombosis data set:
	0.1	0.16073	0.10543
	0.05	0.0808	0.05025
	0.01	0.01741	0.02253
	0.005	0.00515	0.00939
	0.001	0.00112	0.00164
	0.0005	0.00049	0.00079
	0.0001	0.00013	8e-05
Cancer Data set:
	0.1	0.14131	0.15081
	0.05	0.06542	0.06187
	0.01	0.01008	0.01348
	0.005	0.00624	0.00767
	0.001	0.00107	0.00137
	0.0005	0.00048	0.00078
	0.0001	0.00016	0.00013

## Sheet: Supplemental Table 9
SNP	Gene	P
rs16846673	P2RY12	0.003
rs6031	F5	0.005
rs17255978	ADAM22	0.005
rs2233106	MATN4	0.006
rs2068178	ACTRT3	0.008
rs2266691	CCNH	0.009
rs12608960	SH2D3A	0.011
rs2069683	F2RL2	0.012
rs11543283	SLC41A3	0.012
rs6689850	C1orf65	0.012
rs6907580	GPRC6A	0.013
rs35452097	PIGS	0.026
rs2232434	ZSCAN12	0.028
rs5939	PTAFR	0.03
rs10187689	C2orf40	0.037
rs17155937	DNAJB9	0.038
rs17023638	PRMT10	0.048
rs10974657	SPATA6L	0.05
rs6659176	NR0B2	0.051
rs3795519	CENPF	0.055
rs3795522	CENPF	0.058
rs3795523	CENPF	0.058
rs3795517	CENPF	0.061
rs13326552	TGM4	0.062
rs12067133	CENPF	0.062
rs17598561	NMB	0.069
rs3097675	HLA-DPB1	0.071
rs11868946	DNAH2	0.074
rs16919579	MRPS28	0.075
rs2240038	ZNF749	0.08
rs17151919	LEP	0.081
rs2066703	ATP10A	0.082
rs17147995	GPNMB	0.084
rs1022586	QSER1	0.085
rs2228065	ALOX5	0.088
rs17883898	CXCL12	0.095
rs7112749	OTOG	0.097
rs17360994	C1orf172	0.098
rs902393	FRMD1	0.099
rs16891646	BTN2A2	0.099
rs28381349	MSH5	0.102
rs8187692	ABCC2	0.103
rs2041049	DBF4	0.107
rs16988799	KLK8	0.111
rs12339582	UNC13B	0.113
rs3087477	ORC1	0.114
rs6736017	HTR2B	0.115
rs4988492	GHRH	0.115
rs6933573	SLC17A1	0.116
rs77055528	AHNAK	0.118
rs12267385	ZFAND4	0.119
rs17182762	CCDC176	0.12
rs7202010	C16orf71	0.124
rs2066704	ATP10A	0.124
rs2297781	QSER1	0.125
rs1055153	WWTR1	0.127
rs6059139	BPIFA2	0.131
rs7151995	KHNYN	0.132
rs1981071	IFI44L	0.135
rs16879259	FASTKD3	0.137
rs7854446	GPR144	0.137
rs6731822	CKAP2L	0.14
rs3911893	SKIV2L	0.141
rs28381319	MMP21	0.145
rs3917724	SELP	0.146
rs16832619	TBCE	0.148
rs3815875	LY75	0.15
rs7927388	TSGA10IP	0.152
rs11833801	GPR133	0.157
rs11549795	ASCC2	0.158
rs16885197	TINAG	0.166
rs12291617	OR8K3	0.166
rs2227955	HSPA1L	0.167
rs9444039	DOPEY1	0.17
rs16832611	TBCE	0.172
rs34432931	TIGD4	0.175
rs12422149	SLCO2B1	0.177
rs161628	G6PC	0.177
rs2227902	REST	0.182
rs10413455	ZNF134	0.182
rs2230149	UBA7	0.182
rs2230524	CD180	0.186
rs6975981	ABCB8	0.187
rs11802835	TRIM67	0.196
rs17163271	TAF1A	0.206
rs2511241	P2RY2	0.21
rs2304821	PTPRB	0.214
rs6700677	LEPRE1	0.217
rs7246969	OR7G1	0.218
rs13419724	SLC39A10	0.219
rs2472647	PCDHGA1	0.223
rs16992035	DTHD1	0.225
rs9306099	C21orf2	0.225
rs588703	IFI35	0.226
rs915877	TRAPPC10	0.226
rs2229774	RARG	0.227
rs12359281	ANKRD26	0.234
rs11970638	HIST1H1B	0.236
rs2269383	CPT1B	0.238
rs11870360	AKAP10	0.238
rs11553143	DENND6B	0.238
rs7920896	TACC2	0.246
rs10489962	FHAD1	0.248
rs619128	C4orf45	0.248
rs17107831	PODN	0.25
rs10115703	CER1	0.256
rs7246980	OR7G1	0.259
rs17094821	DACT1	0.26
rs7565275	SAG	0.26
rs2228473	UQCRC2	0.261
rs768994	RSPH3	0.262
rs7296162	UHRF1BP1L	0.265
rs11549789	PYCRL	0.271
rs1805373	OGG1	0.275
rs608433	ZNF236	0.279
rs2974942	PPP1R3A	0.282
rs35196751	VARS	0.283
rs8072406	TBCD	0.288
rs4150313	ERCC5	0.289
rs3211938	CD36	0.291
rs2974938	PPP1R3A	0.293
rs26008	FNIP1	0.294
rs2348353	YIPF7	0.294
rs11575594	CCL27	0.294
rs2431352	IQGAP2	0.302
rs2230635	CHAF1A	0.304
rs9312870	FAM105B	0.308
rs2279854	PTPLAD1	0.31
rs2917782	STARD6	0.315
rs16998061	CYTH4	0.316
rs17122711	BPIFB4	0.316
rs6758025	ZAK	0.323
rs4252499	TRPV5	0.335
rs8104931	MYBPC2	0.341
rs2286323	MTERFD2	0.343
rs2170646	GUCY1A3	0.344
rs35571449	SLC24A1	0.346
rs12076815	IGSF21	0.346
rs2737085	ITGA6	0.348
rs10504829	CNBD1	0.349
rs10521016	RAI14	0.355
rs17104991	SLC25A21	0.357
rs17138681	AQPEP	0.358
rs2067648	RNASE10	0.361
rs10078686	MGAT4B	0.367
rs16942745	SLC24A6	0.367
rs28507587	NID2	0.368
rs8068240	SMG8	0.371
rs2230382	ITPR2	0.373
rs7135642	USP44	0.379
rs9073	A1CF	0.381
rs10342	MBD4	0.382
rs9930821	HS3ST4	0.383
rs1035442	MUC16	0.384
rs7654410	FREM3	0.385
rs17227354	FANCA	0.389
rs2277552	NOX5	0.395
rs8178318	LPO	0.399
rs3027238	CTC1	0.399
rs61744791	DCAF11	0.409
rs34488963	SLC25A41	0.415
rs16855539	LEMD1	0.416
rs10509332	UNC5B	0.419
rs2307105	EIF2AK4	0.42
rs393044	UBQLNL	0.42
rs16870794	AGXT2	0.422
rs7007084	ADAMDEC1	0.424
rs6874468	SPARC	0.427
rs4894048	TTN	0.428
rs7926203	SHANK2	0.435
rs2274750	TNC	0.441
rs17207923	TNXB	0.441
rs7533166	CENPF	0.441
rs2076506	HDGFL1	0.443
rs17094779	LRRIQ3	0.45
rs11568525	SLC22A5	0.46
rs17880282	WRAP53	0.462
rs34562867	IGFLR1	0.462
rs36042591	PNMA3	0.474
rs8100724	UQCRFS1	0.474
rs16957552	BCAR1	0.475
rs8071814	KRT37	0.476
rs3853648	ZNF594	0.482
rs6934118	ZC2HC1B	0.486
rs11228763	OR9G4	0.49
rs7833473	C8orf47	0.492
rs922985	TTN	0.492
rs16896629	RSPH9	0.493
rs7256787	CYP4F22	0.497
rs17103671	RPGRIP1	0.497
rs7804532	COL28A1	0.5
rs61095322	ACAA1	0.503
rs17121403	AGL	0.506
rs798911	CPED1	0.509
rs17286758	LRRC2	0.509
rs11907355	BPIFB6	0.513
rs35849605	PPP1R12C	0.513
rs7272702	CASS4	0.514
rs373496	TNFRSF17	0.521
rs16824215	PADI1	0.521
rs16903518	C5orf42	0.523
rs1003995	RTP4	0.525
rs3112374	FAM180A	0.529
rs16945431	DNAH9	0.531
rs7702892	C5orf42	0.532
rs3808794	CNTLN	0.532
rs17550360	FGF20	0.534
rs2072164	OR2F1	0.537
rs1135034	SLC35B1	0.537
rs5743673	IL18BP	0.542
rs12094024	CYP4B1	0.546
rs7684722	FRAS1	0.547
rs17102592	CYP4B1	0.55
rs34669811	PIGS	0.551
rs2230157	LAMC1	0.558
rs6140807	RSPO4	0.559
rs6742404	DNPEP	0.566
rs8050974	IFT140	0.569
rs10164753	TTN	0.57
rs17588988	TRIM69	0.573
rs10003238	ATP10D	0.578
rs16982020	CECR5	0.581
rs3210518	OTUD6B	0.585
rs11041525	CYB5R2	0.587
rs2282406	AMER2	0.588
rs17031074	THADA	0.589
rs6464201	GALNT11	0.595
rs16996616	APOL1	0.595
rs2291628	FBN2	0.596
rs2233903	SEMG2	0.597
rs1802323	LY86	0.598
rs16957538	BBS2	0.598
rs1043261	IL17RB	0.601
rs17025503	DNAH6	0.602
rs3888778	PRR3	0.602
rs7940077	QSER1	0.603
rs12109782	FNIP1	0.607
rs9675246	KRT36	0.611
rs6742280	SLC9A4	0.613
rs2228063	CA2	0.616
rs16852767	NUF2	0.616
rs12268559	CCDC7	0.618
rs7927108	NCAPD3	0.618
rs4690661	WDR17	0.623
rs10272187	RAMP3	0.625
rs3731895	RESP18	0.634
rs41469	TAS2R1	0.636
rs34494265	KIRREL2	0.638
rs3917973	CSF3R	0.639
rs9267532	LY6G5B	0.642
rs3917974	CSF3R	0.643
rs12530146	MDN1	0.643
rs11802902	PALMD	0.646
rs3212723	JAK3	0.647
rs61737838	NOL12	0.649
rs2256871	CYP2C9	0.654
rs16889320	RSPH3	0.663
rs17031297	PLEKHH2	0.665
rs3129157	OR2J2	0.666
rs10406757	ALDH16A1	0.667
rs60293430	ACACB	0.677
rs2302878	PSME4	0.678
rs1923185	GMNN	0.682
rs8072048	LRRC48	0.688
rs9626829	PKDREJ	0.689
rs438363	HELZ2	0.694
rs17762735	OR1A1	0.695
rs16989535	DEPDC5	0.702
rs8131735	KRTAP19-2	0.705
rs7216628	SLFN13	0.707
rs9296146	DEF6	0.707
rs10014170	N4BP2	0.707
rs2231510	CHAD	0.712
rs867186	PROCR	0.713
rs7924553	DCHS1	0.718
rs9909732	TOP3A	0.733
rs297118	OR5D13	0.734
rs34043027	SLC22A14	0.735
rs7626962	SCN5A	0.74
rs7577483	FAM179A	0.74
rs1748020	PADI4	0.744
rs16845107	WDR52	0.753
rs16958654	ZC3H7A	0.76
rs4946977	MICAL1	0.769
rs505480	KIAA1456	0.77
rs8072510	SLFN13	0.772
rs1529874	ECEL1	0.774
rs2234622	XYLB	0.774
rs2073714	SLC22A14	0.774
rs1678674	DNAH8	0.777
rs2296225	KIF17	0.784
rs423141	OR6K2	0.79
rs28986467	MDC1	0.793
rs413029	OR6K2	0.797
rs17001213	SMCR7L	0.807
rs17736370	KCNG4	0.807
rs16855164	CEP350	0.813
rs2072036	TNN	0.824
rs17099969	DYNC2H1	0.825
rs7039287	AKAP2	0.825
rs16932912	RECK	0.825
rs7908490	RBM20	0.837
rs10027479	BBS12	0.869
rs297054	OR5D14	1
rs2929516	MYO9A	1
rs11126472	EVA1A	1
rs12256262	TTC18	1
rs16992131	NMRK2	1
rs16989521	TCP10L	1
rs2567241	CLGN	1
rs1109968	CCDC146	1
rs2445179	MRGPRX4	1
rs16987188	KIAA1755	1
rs2444007	TRIM69	1
rs16981956	ZNF114	1
rs2306369	KIAA1109	1
rs2298813	SORL1	1
rs2285348	GCC1	1
rs16944971	FURIN	1
rs12060879	DPT	1
rs2275831	CEP104	1
rs2273801	WDR25	1
rs16931549	DNAI1	1
rs2272722	DERL1	1
rs10793873	PRRC2B	1
rs11917716	GUCA1C	1
rs2242047	SLC28A1	1
rs2237857	FANCG	1
rs2233578	PAX4	1
rs1029396	ASZ1	1
rs10735309	NAV3	1
rs11896293	ALMS1	1
rs2233560	OR2S2	1
rs2233295	TNIP1	1
rs16875122	ADAMTS16	1
rs2230570	EIF4G1	1
rs1065205	SERPINB3	1
rs16870608	UTP15	1
rs12172926	MYLK	1
rs10083536	TEP1	1
rs1028180	BLZF1	1
rs11838270	TMPO	1
rs16867510	SSFA2	1
rs2175563	CLGN	1
rs2073201	SGSM1	1
rs12259382	NOC3L	1
rs11833399	HPD	1
rs2072174	ZNF596	1
rs11826683	DPP3	1
rs16833835	TCHHL1	1
rs2069830	IL6	1
rs11820003	NELL1	1
rs16828486	ASAP3	1
rs1959630	OR4L1	1
rs16823940	WRAP73	1
rs1801474	PARK2	1
rs17855934	VEZT	1
rs17855933	VEZT	1
rs1175640	CTTNBP2NL	1
rs1493953	MICALCL	1
rs17717241	RAD21L1	1
rs11594934	DUPD1	1
rs13409059	THSD7B	1
rs13405869	MOGS	1
rs17544587	CCDC173	1
rs1746842	MACF1	1
rs13321689	USP19	1
rs11569681	SULT2A1	1
rs13021	PNN	1
rs17225943	FANCA	1
rs12792040	ESAM	1
rs12782963	PKD2L1	1
rs17119344	MYO1A	1
rs10417885	RANBP3	1
rs17118224	KRT77	1
rs12419308	C2CD3	1
rs3800544	WDR27	1
rs3781408	CTBP2	1
rs3751803	MTHFSD	1
rs3749930	NOX3	1
rs12337034	TRMT10B	1
rs12331663	NAF1	1
rs34621310	CDH16	1
rs34574340	CUL7	1
rs12322444	IKBIP	1
rs17020956	C4BPA	1
rs323343	TEX15	1
rs17016865	TOP2B	1
rs17012064	PTPN13	1
rs17009684	FAT4	1
rs17002890	TCF20	1
rs3014626	PPP1R15B	1
rs4393101	MYOM3	1
rs8176038	KEL	1
rs6880875	SLC6A3	1
rs8082683	KRT36	1
rs6855813	PHF17	1
rs6840615	BST1	1
rs8069943	KRT36	1
rs8057474	ABCC12	1
rs4253230	ERCC6	1
rs6756629	ABCG5	1
rs7938203	CLPB	1
rs3923647	TLR1	1
rs5030752	EPRS	1
rs499037	OR10V1	1
rs7823979	SLC39A4	1
rs7821248	CA1	1
rs6584356	PKD2L1	1
rs4986826	AHR	1
rs6504191	SCN4A	1
rs7666283	DCHS2	1
rs624307	SLC25A45	1
rs7532933	UBE2U	1
rs748358	AHNAK2	1
rs736118	STRA6	1
rs4855271	SI	1
rs61733152	INPP4B	1
rs7260392	TDRD12	1
rs475076	RNF217	1
rs6114	SERPINA5	1
rs7210156	C17orf98	1
rs997983	MKI67	1
rs9901675	CD68	1
rs4732748	ESCO2	1
rs9892705	TTYH2	1
rs7128270	C11orf34	1
rs9676012	ANKRD30B	1
rs9668527	VSIG10	1
rs7086200	CDHR1	1
rs7073610	CWF19L1	1
rs6046740	C20orf26	1
rs9295783	ZNF311	1

## Sheet: Supplemental Table 10
SNP	Gene	P
rs6031	F5	0.002
rs6689850	C1orf65	0.004
rs2233106	MATN4	0.007
rs17255978	ADAM22	0.01
rs16846673	P2RY12	0.011
rs35452097	PIGS	0.011
rs10187689	C2orf40	0.019
rs11868946	DNAH2	0.022
rs16891646	BTN2A2	0.03
rs17151919	LEP	0.031
rs12339582	UNC13B	0.031
rs6059139	BPIFA2	0.033
rs17147995	GPNMB	0.04
rs17023638	PRMT10	0.042
rs2266691	CCNH	0.043
rs10413455	ZNF134	0.046
rs7112749	OTOG	0.051
rs2232434	ZSCAN12	0.055
rs11802835	TRIM67	0.056
rs6736017	HTR2B	0.056
rs1981071	IFI44L	0.058
rs28381349	MSH5	0.059
rs2297781	QSER1	0.06
rs1055153	WWTR1	0.062
rs2511241	P2RY2	0.064
rs12608960	SH2D3A	0.065
rs2069683	F2RL2	0.07
rs2068178	ACTRT3	0.071
rs5939	PTAFR	0.071
rs11543283	SLC41A3	0.073
rs28381319	MMP21	0.077
rs2229774	RARG	0.079
rs17155937	DNAJB9	0.081
rs3911893	SKIV2L	0.084
rs16832619	TBCE	0.086
rs2304821	PTPRB	0.091
rs13326552	TGM4	0.092
rs3097675	HLA-DPB1	0.093
rs6731822	CKAP2L	0.095
rs16832611	TBCE	0.096
rs8187692	ABCC2	0.099
rs7246980	OR7G1	0.105
rs2917782	STARD6	0.105
rs26008	FNIP1	0.105
rs12422149	SLCO2B1	0.108
rs16919579	MRPS28	0.11
rs161628	G6PC	0.111
rs7246969	OR7G1	0.114
rs10489962	FHAD1	0.115
rs2431352	IQGAP2	0.123
rs12359281	ANKRD26	0.127
rs17883898	CXCL12	0.129
rs7151995	KHNYN	0.134
rs2472647	PCDHGA1	0.138
rs1035442	MUC16	0.139
rs6907580	GPRC6A	0.139
rs11870360	AKAP10	0.14
rs6700677	LEPRE1	0.144
rs4252499	TRPV5	0.149
rs2228473	UQCRC2	0.159
rs4894048	TTN	0.16
rs17182762	CCDC176	0.161
rs3795523	CENPF	0.162
rs3795522	CENPF	0.162
rs2227955	HSPA1L	0.162
rs12067133	CENPF	0.165
rs3795519	CENPF	0.166
rs11549795	ASCC2	0.167
rs3087477	ORC1	0.169
rs1022586	QSER1	0.169
rs16992035	DTHD1	0.172
rs9073	A1CF	0.173
rs608433	ZNF236	0.174
rs6758025	ZAK	0.175
rs3795517	CENPF	0.176
rs8071814	KRT37	0.176
rs8072406	TBCD	0.183
rs6659176	NR0B2	0.191
rs2076506	HDGFL1	0.196
rs7256787	CYP4F22	0.206
rs7854446	GPR144	0.21
rs17102592	CYP4B1	0.21
rs768994	RSPH3	0.212
rs12094024	CYP4B1	0.214
rs34432931	TIGD4	0.218
rs11833801	GPR133	0.219
rs8050974	IFT140	0.22
rs10504829	CNBD1	0.223
rs16870794	AGXT2	0.224
rs9930821	HS3ST4	0.225
rs16896629	RSPH9	0.225
rs2277552	NOX5	0.226
rs902393	FRMD1	0.232
rs4690661	WDR17	0.233
rs8100724	UQCRFS1	0.234
rs6874468	SPARC	0.234
rs7920896	TACC2	0.236
rs17107831	PODN	0.243
rs9909732	TOP3A	0.244
rs10509332	UNC5B	0.246
rs16957552	BCAR1	0.247
rs16885197	TINAG	0.25
rs17121403	AGL	0.255
rs2228065	ALOX5	0.257
rs11228763	OR9G4	0.259
rs2041049	DBF4	0.259
rs2227902	REST	0.261
rs2230157	LAMC1	0.263
rs35849605	PPP1R12C	0.265
rs77055528	AHNAK	0.267
rs3917724	SELP	0.269
rs17138681	AQPEP	0.27
rs17031297	PLEKHH2	0.272
rs61737838	NOL12	0.277
rs10521016	RAI14	0.281
rs7927108	NCAPD3	0.282
rs3815875	LY75	0.289
rs7296162	UHRF1BP1L	0.291
rs17094821	DACT1	0.291
rs2291628	FBN2	0.303
rs2170646	GUCY1A3	0.31
rs16855164	CEP350	0.314
rs7908490	RBM20	0.319
rs12267385	ZFAND4	0.326
rs9444039	DOPEY1	0.336
rs11802902	PALMD	0.342
rs17286758	LRRC2	0.347
rs12076815	IGSF21	0.347
rs16998061	CYTH4	0.35
rs10003238	ATP10D	0.353
rs6742280	SLC9A4	0.366
rs10342	MBD4	0.397
rs17094779	LRRIQ3	0.419
rs588703	IFI35	0.421
rs915877	TRAPPC10	1
rs6933573	SLC17A1	1
rs8178318	LPO	1
rs8104931	MYBPC2	1
rs438363	HELZ2	1
rs6855813	PHF17	1
rs8072048	LRRC48	1
rs393044	UBQLNL	1
rs8072510	SLFN13	1
rs6880875	SLC6A3	1
rs8131735	KRTAP19-2	1
rs60293430	ACACB	1
rs867186	PROCR	1
rs6975981	ABCB8	1
rs922985	TTN	1
rs8069943	KRT36	1
rs8068240	SMG8	1
rs8057474	ABCC12	1
rs798911	CPED1	1
rs505480	KIAA1456	1
rs6742404	DNPEP	1
rs7938203	CLPB	1
rs7927388	TSGA10IP	1
rs7926203	SHANK2	1
rs7924553	DCHS1	1
rs3923647	TLR1	1
rs499037	OR10V1	1
rs7833473	C8orf47	1
rs7821248	CA1	1
rs4988492	GHRH	1
rs7804532	COL28A1	1
rs7702892	C5orf42	1
rs4986826	AHR	1
rs6504191	SCN4A	1
rs7666283	DCHS2	1
rs7626962	SCN5A	1
rs6464201	GALNT11	1
rs7654410	FREM3	1
rs423141	OR6K2	1
rs7684722	FRAS1	1
rs7577483	FAM179A	1
rs6584356	PKD2L1	1
rs4946977	MICAL1	1
rs624307	SLC25A45	1
rs7565275	SAG	1
rs7823979	SLC39A4	1
rs7533166	CENPF	1
rs619128	C4orf45	1
rs7532933	UBE2U	1
rs3917974	CSF3R	1
rs4150313	ERCC5	1
rs748358	AHNAK2	1
rs61744791	DCAF11	1
rs736118	STRA6	1
rs5030752	EPRS	1
rs4253230	ERCC6	1
rs7940077	QSER1	1
rs6756629	ABCG5	1
rs7272702	CASS4	1
rs5743673	IL18BP	1
rs6840615	BST1	1
rs4855271	SI	1
rs61733152	INPP4B	1
rs7260392	TDRD12	1
rs6140807	RSPO4	1
rs8082683	KRT36	1
rs7216628	SLFN13	1
rs41469	TAS2R1	1
rs475076	RNF217	1
rs6114	SERPINA5	1
rs7210156	C17orf98	1
rs8176038	KEL	1
rs4393101	MYOM3	1
rs6934118	ZC2HC1B	1
rs7202010	C16orf71	1
rs61095322	ACAA1	1
rs997983	MKI67	1
rs7007084	ADAMDEC1	1
rs9267532	LY6G5B	1
rs9901675	CD68	1
rs9892705	TTYH2	1
rs7128270	C11orf34	1
rs9676012	ANKRD30B	1
rs9668527	VSIG10	1
rs7086200	CDHR1	1
rs9626829	PKDREJ	1
rs9675246	KRT36	1
rs4732748	ESCO2	1
rs7135642	USP44	1
rs9312870	FAM105B	1
rs7073610	CWF19L1	1
rs9306099	C21orf2	1
rs3888778	PRR3	1
rs3917973	CSF3R	1
rs413029	OR6K2	1
rs9296146	DEF6	1
rs6046740	C20orf26	1
rs7039287	AKAP2	1
rs9295783	ZNF311	1
rs2929516	MYO9A	1
rs12256262	TTC18	1
rs28507587	NID2	1
rs2567241	CLGN	1
rs12109782	FNIP1	1
rs16987188	KIAA1755	1
rs2444007	TRIM69	1
rs2306369	KIAA1109	1
rs2302878	PSME4	1
rs2298813	SORL1	1
rs2285348	GCC1	1
rs10974657	SPATA6L	1
rs12060879	DPT	1
rs16942745	SLC24A6	1
rs2275831	CEP104	1
rs10115703	CER1	1
rs2279854	PTPLAD1	1
rs16945431	DNAH9	1
rs2296225	KIF17	1
rs16958654	ZC3H7A	1
rs16981956	ZNF114	1
rs2348353	YIPF7	1
rs1109968	CCDC146	1
rs16988799	KLK8	1
rs16989521	TCP10L	1
rs2737085	ITGA6	1
rs11126472	EVA1A	1
rs28986467	MDC1	1
rs16996616	APOL1	1
rs297118	OR5D13	1
rs2273801	WDR25	1
rs16931549	DNAI1	1
rs2269383	CPT1B	1
rs2256871	CYP2C9	1
rs11917716	GUCA1C	1
rs16903518	C5orf42	1
rs2240038	ZNF749	1
rs2234622	XYLB	1
rs2233903	SEMG2	1
rs2233578	PAX4	1
rs10735309	NAV3	1
rs11896293	ALMS1	1
rs16889320	RSPH3	1
rs2233295	TNIP1	1
rs2230635	CHAF1A	1
rs16875122	ADAMTS16	1
rs2230524	CD180	1
rs2230382	ITPR2	1
rs1065205	SERPINB3	1
rs16870608	UTP15	1
rs2230149	UBA7	1
rs16867510	SSFA2	1
rs16855539	LEMD1	1
rs2228063	CA2	1
rs10027479	BBS12	1
rs10083536	TEP1	1
rs1028180	BLZF1	1
rs2175563	CLGN	1
rs16852767	NUF2	1
rs2073201	SGSM1	1
rs16845107	WDR52	1
rs2072164	OR2F1	1
rs11826683	DPP3	1
rs16833835	TCHHL1	1
rs2069830	IL6	1
rs2066704	ATP10A	1
rs16828486	ASAP3	1
rs2066703	ATP10A	1
rs1959630	OR4L1	1
rs10272187	RAMP3	1
rs1923185	GMNN	1
rs16823940	WRAP73	1
rs1805373	OGG1	1
rs1801474	PARK2	1
rs17880282	WRAP53	1
rs1678674	DNAH8	1
rs1802323	LY86	1
rs16824215	PADI1	1
rs17855934	VEZT	1
rs1529874	ECEL1	1
rs17855933	VEZT	1
rs11820003	NELL1	1
rs2067648	RNASE10	1
rs17762735	OR1A1	1
rs1175640	CTTNBP2NL	1
rs1493953	MICALCL	1
rs17736370	KCNG4	1
rs2072036	TNN	1
rs11833399	HPD	1
rs2072174	ZNF596	1
rs2073714	SLC22A14	1
rs17717241	RAD21L1	1
rs13419724	SLC39A10	1
rs17598561	NMB	1
rs17588988	TRIM69	1
rs11594934	DUPD1	1
rs13409059	THSD7B	1
rs17550360	FGF20	1
rs11838270	TMPO	1
rs17544587	CCDC173	1
rs10078686	MGAT4B	1
rs13405869	MOGS	1
rs1748020	PADI4	1
rs11575594	CCL27	1
rs1746842	MACF1	1
rs17360994	C1orf172	1
rs2230570	EIF4G1	1
rs16879259	FASTKD3	1
rs2231510	CHAD	1
rs13321689	USP19	1
rs1029396	ASZ1	1
rs2233560	OR2S2	1
rs11907355	BPIFB6	1
rs17227354	FANCA	1
rs2237857	FANCG	1
rs10793873	PRRC2B	1
rs2242047	SLC28A1	1
rs11569681	SULT2A1	1
rs13021	PNN	1
rs17225943	FANCA	1
rs11970638	HIST1H1B	1
rs2272722	DERL1	1
rs16932912	RECK	1
rs2274750	TNC	1
rs12792040	ESAM	1
rs17207923	TNXB	1
rs16944971	FURIN	1
rs2282406	AMER2	1
rs2286323	MTERFD2	1
rs1043261	IL17RB	1
rs11568525	SLC22A5	1
rs12782963	PKD2L1	1
rs17163271	TAF1A	1
rs16957538	BBS2	1
rs11041525	CYB5R2	1
rs11553143	DENND6B	1
rs12530146	MDN1	1
rs17122711	BPIFB4	1
rs2307105	EIF2AK4	1
rs16982020	CECR5	1
rs2445179	MRGPRX4	1
rs17119344	MYO1A	1
rs3853648	ZNF594	1
rs12172926	MYLK	1
rs10417885	RANBP3	1
rs17118224	KRT77	1
rs3808794	CNTLN	1
rs12419308	C2CD3	1
rs3800544	WDR27	1
rs16989535	DEPDC5	1
rs16992131	NMRK2	1
rs12259382	NOC3L	1
rs297054	OR5D14	1
rs17104991	SLC25A21	1
rs2974938	PPP1R3A	1
rs17103671	RPGRIP1	1
rs3781408	CTBP2	1
rs3749930	NOX3	1
rs373496	TNFRSF17	1
rs17099969	DYNC2H1	1
rs3731895	RESP18	1
rs36042591	PNMA3	1
rs12337034	TRMT10B	1
rs35571449	SLC24A1	1
rs34669811	PIGS	1
rs34621310	CDH16	1
rs12331663	NAF1	1
rs17031074	THADA	1
rs34574340	CUL7	1
rs34562867	IGFLR1	1
rs17025503	DNAH6	1
rs34494265	KIRREL2	1
rs12322444	IKBIP	1
rs34488963	SLC25A41	1
rs35196751	VARS	1
rs34043027	SLC22A14	1
rs17020956	C4BPA	1
rs323343	TEX15	1
rs3212723	JAK3	1
rs11549789	PYCRL	1
rs1135034	SLC35B1	1
rs12291617	OR8K3	1
rs17016865	TOP2B	1
rs3211938	CD36	1
rs3751803	MTHFSD	1
rs3210518	OTUD6B	1
rs17012064	PTPN13	1
rs3129157	OR2J2	1
rs12268559	CCDC7	1
rs17009684	FAT4	1
rs3112374	FAM180A	1
rs17002890	TCF20	1
rs3027238	CTC1	1
rs10014170	N4BP2	1
rs1003995	RTP4	1
rs10164753	TTN	1
rs10406757	ALDH16A1	1
rs3014626	PPP1R15B	1
rs17001213	SMCR7L	1
rs2974942	PPP1R3A	1

[truncated: 23 more sheets: Supplemental Table 11, Supplemental Table 12, Supplemental table 13, Supplemental Table 14, Supplemental Table 15, Supplemental Table 16, Supplemental Table 17, Supplemental Table 18, Supplemental Table 19, Supplemental Table 20, Supplemental Table 21, Supplemental Table 22, Supplemental Table 23, Supplemental Table 24, Supplemental Table 25, Supplemental Table 26, Supplemental Table 27, Supplemental Table 28, Supplemental Table 29, Supplemental Table 30 …]
