# Supplementary material for: Mechanistic Phenotypes: An Aggregative Phenotyping Strategy to Identify Disease Mechanisms Using GWAS Data
Source: PubMed Central journal article supplement (PMC3861317; doi:10.1371/journal.pone.0081503), 2013-12-12

# Supplemental figure 4

**a**

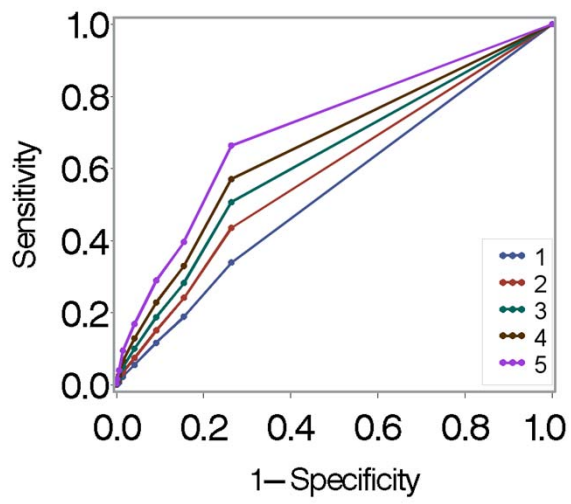

**b**

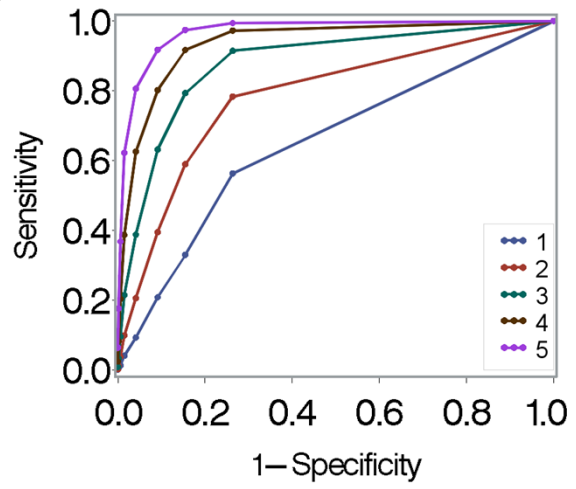

Supplement: pone.0081503.s004.pdf [file pone.0081503.s004.pdf]
